1 Running title: Phylogenomics and biogeography of the apple genus (*Malus*)

2 Phylogenomic analyses in the apple genus *Malus* s.l. reveal widespread

3 hybridization and allopolyploidy driving the diversifications, with insights into the

4 complex biogeographic history in the Northern Hemisphere

5 Bin-Bin Liu<sup>1,2\*</sup>, Chen Ren<sup>3,4</sup>, Myounghai Kwak<sup>5</sup>, Richard G.J. Hodel<sup>2</sup>, Chao Xu<sup>1</sup>, Jian He<sup>6</sup>, Wen-Bin

6 Zhou<sup>7</sup>, Chien-Hsun Huang<sup>8</sup>, Hong Ma<sup>9</sup>, Guan-Ze Qian<sup>10</sup>, De-Yuan Hong<sup>1</sup>, Jun Wen<sup>2\*</sup>

7 Correspondance: Bin-Bin Liu ([liubinbin@ibcas.ac.cn](mailto:liubinbin@ibcas.ac.cn)) or Jun Wen ([wenj@si.edu](mailto:wenj@si.edu))

8 <sup>1</sup>State Key Laboratory of Systematic and Evolutionary Botany, Institute of Botany, Chinese Academy of

9 Sciences, Beijing 100093, China

10 <sup>2</sup>Department of Botany, National Museum of Natural History, Smithsonian Institution, PO Box 37012,

11 Washington, DC 20013-7012, USA

12 Full list of author information is available at the end of the article

13

14 **Abstract:** Phylogenomic evidence from an increasing number of studies has demonstrated that different  
15 data sets and analytical approaches often reconstruct strongly supported but conflicting relationships. In  
16 this study, hundreds of single-copy nuclear (SCN) genes (785) and complete plastomes (75) were used  
17 to infer the phylogenetic relationships and estimate the historical biogeography of the apple genus *Malus*  
18 sensu lato, an economically important lineage disjunctly distributed in the Northern Hemisphere  
19 involved in known and suspected hybridization and allopolyploidy events. The nuclear phylogeny  
20 recovered the monophyly of *Malus* s.l. (including *Docynia*); however, it was supported to be biphyletic  
21 in the plastid phylogeny. An ancient chloroplast capture event best explains the cytonuclear discordance  
22 that occurred in the Eocene in western North America. Our conflict analysis demonstrated that ILS,  
23 hybridization, and allopolyploidy could explain the widespread nuclear gene tree discordance. We  
24 detected one deep hybridization event (*Malus doumeri*) involving the ancestor of pome-bearing species  
25 and *Docynia delavayi*, and one recent hybridization event (*Malus coronaria*) between *M. sieversii* and a  
26 combined clade of *M. ioensis* and *M. angustifolia*. Furthermore, our historical biogeographic analysis  
27 combining living and fossil species supported a widespread East Asian-western North American origin  
28 of *Malus* s.l., followed by a series of extinction events in the Eocene in northern East Asia and western  
29 North America. This study provides a valuable evolutionary framework for the breeding and crop  
30 improvement of apples and their close relatives.

31 **Keywords:** deep genome skimming; historical biogeography; genomic discordance; massive extinction;  
32 reticulate evolution; single-copy nuclear genes.

## 33 Introduction

34 The apple genus *Malus* Mill. (tribe Maleae, Rosaceae) is of great economic importance, with the  
35 domesticated apple (*M. domestica* (Suckow) Borkh.), various crabapples, as well as some important  
36 ornamentals (e.g., *M. halliana* Koehne, *M. hupehensis* (Pamp.) Rehder, and *M. micromalus* Makino)<sup>1</sup>.  
37 *Malus* comprises ca. 38-55 species disjunctly distributed across the temperate Northern Hemisphere<sup>2,3</sup>,  
38 from East Asia (ca. 27 species)<sup>2</sup>, Central Asia (ca. two species), Europe (three species)<sup>4</sup>, and the  
39 Mediterranean (ca. two species)<sup>4</sup> to western (one species) and eastern North America (three species)<sup>3</sup>.  
40 Hybridization, polyploidy, and apomixis within the apple genus *Malus* have been reported to have  
41 occurred frequently in the wild and horticulture, and introgression has led to many taxa described in  
42 *Malus*<sup>3,5</sup>. These reticulated processes have significantly challenged the accurate phylogenetic inference  
43 of *Malus*; however, this genus also provides an ideal case for studying the phylogenomic discordance  
44 and its underlying potential causes. Based on morphology, many taxonomists have struggled to propose  
45 a reasonable classification system<sup>5-15</sup>, and over-emphasis of one or a few morphological characters  
46 resulted in the controversial taxonomy at the sectional level, varying from two, five, six, to eight  
47 sections<sup>15-17</sup>. It has been challenging to elucidate the evolutionary relationships among *Malus* members  
48 based solely on morphological evidence. Robinson et al. (2001) first used molecular evidence (plastid  
49 *matK* and nuclear ribosomal internal transcribed spacer (nrITS) sequences) to explore the phylogenetic  
50 relationships of five sections sensu Rehder (1940). Subsequently, phylogenetic studies on *Malus* and its  
51 close relatives used more plastid and nrITS sequences<sup>18</sup>, whole plastome and/or entire nuclear ribosomal  
52 DNA (nrDNA)<sup>19-21</sup>, and transcriptomic dataset<sup>22</sup>. These studies provided significant insights into the  
53 major clades, but many questions remain due to the limited informative sites and/or taxon sampling (Fig.  
54 1). The phylogenetic analysis in the framework of Maleae so far has shown strongly supported yet  
55 discordant nuclear and chloroplast topologies of *Malus* sect. *Chloromeles* (Decne.) Rehder and *M.* sect.  
56 *Eriolobus* lineage, which makes *Malus* s.l. either monophyletic (nuclear sequences: Fig. 1f-i) or  
57 biphyletic (whole plastome: Fig. 1e), suggesting possible hybridization and/or chloroplast capture events

58 in the origin of this clade<sup>21</sup>. However, Lo & Donoghue (2012) produced a monophyletic *Malus* s.l. based  
59 on 11 plastid regions as Robinson et al. (2001) did using *matK* regions (Fig. 1a, b). Generally,  
60 phylogenetic relationships within *Malus* s.l. are not fully resolved, particularly along the backbone of the  
61 phylogeny.

62 Phylogenomics has revolutionized plant systematics and evolution as well as the associated fields  
63 in the last decades, enabling the utilization of a large number of nuclear genes for testing phylogenetic  
64 hypotheses, especially untangling recalcitrant relationships using traditional molecular systematic  
65 approaches<sup>23-25</sup>. While data collection efforts have significantly increased overall phylogenetic support,  
66 these analyses are a double-edged sword by demonstrating that different data sets and analytical  
67 approaches often reconstruct strongly supported but conflicting relationships<sup>26-28</sup>. Underlying these  
68 conflicting topologies are strongly discordant gene trees<sup>29</sup>, which may be due to several biological  
69 processes such as gene duplication, incomplete lineage sorting (ILS), and gene flow (e.g., hybridization,  
70 allopolyploidy, and introgression). High levels of gene tree discordance have occurred in the nuclear  
71 genome and in the plastome, with the latter often regarded as a single locus<sup>30-34</sup>. The evidence so far  
72 suggests that gene flow between lineages promoted the diversification of land plants<sup>34,35</sup>. Additionally,  
73 conflicts between nuclear and organellar genomes, often called cytonuclear discordance, complicate  
74 phylogenetic inference. Generally, cytonuclear conflict has been interpreted as a result of introgressive  
75 chloroplast capture, which has been found in various lineages of angiosperms<sup>21,36-38</sup>. Despite widespread  
76 introgression detected in angiosperms, current methods for phylogenetic inference often either assume  
77 no gene tree discordance (i.e., concatenated supermatrices) or only consider a coalescent model in which  
78 all discordance is attributed to ILS<sup>39,40</sup>. Recently, through calculating unique, conflicting, and concordant  
79 bipartitions (e.g., *phyparts*)<sup>29</sup> or quartet-based evaluation (e.g., Quartet-Sampling)<sup>41</sup>, the highly  
80 supported but sometimes conflicting relationships can be quantified. Additionally, phylogenetic network  
81 analysis has allowed estimating species trees to account for ILS and introgression<sup>42-44</sup>, and this approach  
82 can explore the mechanisms of the discordance.

83 *Malus* s.l. has a wide disjunct distribution in the major refugia of the Northern Hemisphere: East

84 Asia, the Mediterranean, western North America, and eastern North America, as well as Europe. This  
85 distribution pattern provides an ideal case study for exploring the evolution of the major patterns of  
86 biogeographic disjunctions in the Northern Hemisphere. Such disjunctions are generally considered to  
87 be remnants of a more continuously distributed, mixed mesophytic forest during the Tertiary<sup>45,46</sup>. Due to  
88 the geologic and climatic oscillations, the once more widely distributed flora was fragmented and  
89 became relict in four major refugia: East Asia, eastern North America, western North America, and  
90 Southwest Europe. Based on phylogenetic analyses of 47 chloroplast genomes, Nikiforova et al. (2013)  
91 suggested a North American origin of *Malus*, which was in accordance with the fossil evidence, because  
92 many fossils were recorded in the middle to late Eocene from western North America<sup>47-53</sup>. Contrasting  
93 this New World origin hypothesis, Jin (2014) proposed an alternative hypothesis of East Asian origin  
94 based on biogeographic analyses using complete plastome data. Jin (2014) concluded that this conflict  
95 may be due to the lack of sampling of key early diverged lineages, such as *Malus doumeri* (Bois) A.  
96 Chev., *M. florentina* C.K.Schneid., and *M. trilobata* C.K.Schneid. in Nikiforova et al. (2013)'s study.  
97 However, Jin (2014)'s misidentified *M. doumeri* sample (actually *Pseudocydonia sinensis* (Thouin)  
98 C.K.Schneid.<sup>21</sup>) may have also biased the phylogenetic inference and historical biogeographic  
99 estimation. These two conflicting hypotheses showcase the need for a robust phylogenetic framework  
100 with a comprehensive taxon sampling scheme to reconstruct the biogeographic history of *Malus*.

101 In this study, we intend to explore gene tree concordance and the phylogenetic relationships among  
102 major clades to test the potential ILS and hybridization events in the evolutionary history of *Malus* s.l.  
103 We further conduct biogeographic analyses to infer geographic origins and timing of possible hybrid  
104 clades. Due to their significant economic importance, genomes of apples and their close relatives have  
105 been sequenced, such as *Malus baccata* (L.) Borkh.<sup>54</sup>, *M. × domestica*<sup>55-59</sup>, *M. sieversii* (Ledeb.)  
106 M.Roem.<sup>59</sup>, and *M. sylvestris* Mill.<sup>59</sup>, which provided substantial genome resources for exploring single-  
107 copy nuclear (SCN) genes for phylogenetic analysis. Additionally, numerous genome resequencing,  
108 transcriptomes, and raw genome skimming data are available from the NCBI sequence read archive  
109 (SRA: <https://www.ncbi.nlm.nih.gov/sra>). These raw genomic data, coupled with deep genome

110 skimming data sensu Liu et al. (2021) generated for this study, provide an excellent opportunity to  
111 explore a robust phylogenetic framework within *Malus* s.l. using a large-scale phylogenomic analysis.

112 This study employs extensive genomic data, sampling from 77 individuals by integrating genome  
113 resequencing<sup>57</sup>, transcriptomic<sup>22</sup>, and deep genome skimming data<sup>60</sup> to assemble 797 SCN genes and  
114 whole plastomes. Specifically, we aim to: (1) reconstruct a robust phylogenetic backbone of the apple  
115 genus *Malus* s.l.; (2) explore gene tree conflicts and evaluate the potential causes; and (3) investigate  
116 broad-scale biogeographic relationships and ancestral range evolution.

## 117 **Results**

### 118 **Single-copy nuclear genes and plastome assembly**

119 Raw reads for the 27 newly sequenced deep genome skimming data are available from the NCBI  
120 Sequence Read Archive (SRA: BioProject: PRJNA759205 with the accession for each sample listed in  
121 Supplementary Table S1). The number of clean reads ranged from 33 (*Cotoneaster salicifolius* var.  
122 *henryanus* (C.K.Schneid.) T.T.Yu) to 103 (*Pourthiaea zhejiangensis* (P.L.Chiu) Iketani & H.Ohashi)  
123 million with the sequencing depths varying from 6.7× to 20.8×, assuming an estimated genome size of  
124 around 750 Mb based on *Malus domestica* genome<sup>55</sup>.

125 We designed a set of 797 SCN genes from six genomes as mentioned below for this phylogenomic  
126 study on *Malus* and its close relatives. The number of genes recovered for each sample varied from 665  
127 (83.4%: *Aronia melanocarpa* (Michx.) Elliott) to 797 (100%: 11 samples listed in Supplementary Table  
128 S2) (also referring to Fig. 2), and the number of genes after cleaning ranged from 568 (71.3%: *Malus*  
129 *doumeri*) to 785 (98.5%: *Malus baccata*) (Fig. 1 and Supplementary Table S2).

130 We successfully assembled 69 plastomes for this study, except *Aronia melanocarpa*, *Crataegus*  
131 *pinnatifida* Bunge, *Eriolobus trilobatus* (Labill. ex Poir.) M.Roem., *Pyrus pyrifolia* (Burm.f.) Nakai, and  
132 *Sorbus commixta* Hedl. due to the limited plastid reads in the raw data. All plastomes were submitted to  
133 GenBank with accessions listed in Supplementary Table S1, and the aligned plastid matrix was

134 deposited in Dryad Digital Repository (Data S4) <https://doi.org/10.5061/dryad.2jm63xsq5>.

### 135 **Nuclear phylogenetic analysis and gene tree discordance**

136 We obtained sequences of 785 genes with at least 47 samples and 273 bp for each gene (Data S1,  
137 available from Dryad Digital Repository <https://doi.org/10.5061/dryad.2jm63xsq5>). We kept 604 genes  
138 with more than 900 bp in aligned length for the downstream phylogenetic analysis. To test the effect of  
139 missing data for phylogenetic analysis, we generated three datasets including different numbers of  
140 samples for each clean gene, i.e., 50%-sample dataset (604 genes), 80%-sample dataset (589 genes), and  
141 all-sample dataset (66 genes), and all these three datasets have been deposited in Dryad Digital  
142 Repository (Data S2-S4) <https://doi.org/10.5061/dryad.2jm63xsq5>. These three concatenated matrices  
143 consisted of 1,193,313 bp, 1,042,020 bp, and 152,891 bp in aligned length. We estimated nine  
144 phylogenetic trees (Fig. 3 and Supplementary Figs. S1-S9), in which six of them resulted in the same  
145 topology. Henceforth, we used the RAxML tree (Fig. 3: hereafter, referred to as “nuclear phylogeny”)  
146 estimated from the 80%-sample dataset for the following analysis. The nuclear phylogeny recovered  
147 *Malus* as paraphyletic with the genus *Docynia* Decne. embedded in *Malus*. *Malus* s.l. was delimited into  
148 three strongly supported major clades (BS = 100, 100, 100). Clade I included most of the species of  
149 *Malus* sect. *Malus* and *M.* sect. *Sorbomalus* except for a Mediterranean species, *M. florentina*. We  
150 sampled 27 individuals of clade I representing 11 species, disjunctly distributed between East Asia,  
151 Europe & Central Asia, and western North America. Clade II is composed of all the eastern North  
152 American (three species) and the Mediterranean species (two species). Clade III included two species,  
153 *M. doumeri*, previously delimited in *M.* sect. *Docyniopsis* C.K.Schneid. and *Docynia delavayi*  
154 C.K.Schneid.

155 Conflicted phylogenetic positions were detected in these nine phylogenetic trees (Fig. 3 and  
156 Supplementary Figs. S1-S9), in which the placements of *Malus coronaria* (L.) Mill. from eastern North  
157 America (Fig. 3: clade V) and the Asian *M. sikkimensis* (Wenz.) Koehne (Fig. 3: clade III) varied  
158 significantly among trees. All three species trees (Supplementary Figs. S3, S6, S9) estimated from



159 ASTRAL-III supported the sister relationship between *M. coronaria* and a large clade consisting of all  
160 species in clade I, II, III, and IV (defined in Fig. 3) (i.e., *M. coronaria* bipartition A: Table 1), while the  
161 remaining six ML trees (Supplementary Figs. S1, S2, S4, S5, S7, S8) estimated from IQ-TREE2 and  
162 RAxML recovered *M. coronaria* as sister to the clade composed of another two eastern North American  
163 species (*M. angustifolia* (Aiton) Michx. and *M. ioensis* (Alph. Wood) Britton) (i.e., *M. coronaria*  
164 bipartition B: Table 1). Likewise, the phylogenetic position of *M. sikkimensis* showed incongruence  
165 among trees (Supplementary Figs. S1-S9). One bipartition supported by seven out of nine trees was the  
166 sister relationship between *M. sikkimensis* and the combined clade, including *M. baccata* var.  
167 *xiaojinensis* (M.H.Cheng & N.G.Jiang) Ponomar., *M. orientalis* Uglitzk., *M. sylvestris*, *M. sieversii*, *M.*  
168 *hupehensis* (Pamp.) Rehder, *M. toringo* (Siebold) de Vriese, *M. baccata*, and *M. rockii* Rehder (i.e., *M.*  
169 *sikkimensis* bipartition A: Table 1), while the other bipartition recovered by only two trees was the sister  
170 relationship between *M. sikkimensis* and the clade composed of two species (*M. fusca* (Raf.)  
171 C.K.Schneid. and *M. kansuensis* (Batalin) C.K.Schneid.) (*M. sikkimensis* bipartition B: Table 1). An  
172 edge-based phylogenomic support test implemented in *phyckle*<sup>28</sup> on the 50%-sample dataset (600 genes  
173 all having *Gillenia stipulata* (Muhl. ex Willd.) Nutt. as outgroup) revealed that *M. coronaria* bipartition  
174 A was supported by more genes (445) than the *M. coronaria* bipartition B (155 genes). Meanwhile, the  
175 summed difference in log-likelihood scores supported the *M. coronaria* bipartition A (sum  $\Delta\ln L =$   
176 17028.36) over the bipartition B (sum  $\Delta\ln L = 4126.411$ ). Although the extreme outlier genes were  
177 excluded (Table 1), both the number of genes ( $427:153 = 2.79 \approx 3:1$ ) and summed difference  
178 ( $14731.52:3876.897$ ) supported the *M. coronaria* bipartition A. Similarly, two different bipartitions for  
179 the placements of *M. sikkimensis* were analyzed by *phyckle*. *Malus sikkimensis* bipartition B was  
180 supported by only 191 genes (sum  $\Delta\ln L = 3987.746$ ) compared to the 409 genes of bipartition A (sum  
181  $\Delta\ln L = 11675.01$ ). Even with the outlier genes removed, *M. sikkimensis* bipartition B had more gene  
182 support (393, sum  $\Delta\ln L = 9168.462$ ) than that of bipartition A (188, sum  $\Delta\ln L = 3647.953$ ).

183 The conflict analysis from *phyparts* showed that significant gene tree discordance was detected  
184 among nuclear genes regarding the placement of three major clades, and minimal informative gene trees



185 supported each clade (Fig. 3 and Supplementary Fig. S11). In contrast, the QS result demonstrated that  
186 all these five nodes related to three major clades were confirmed with full support (1/-/1; i.e., all  
187 informative quartets support that lineage). Although Quartet Sampling (QS) confirmed the monophyly  
188 of *Malus* s.l. (node A) with full support, only 159 out of the 314 informative gene trees (50.6%) were  
189 concordant with this topology (ICA = 0.23). In contrast, only 56% of sampled informative quartets  
190 supported node B with only one alternative discordant topology (QS score = 0.56/0/1), but the *phyparts*  
191 result showed only 38 out of the 339 informative gene trees (11.2%; ICA = 0.05) supported this clade.  
192 Similarly, node E was supported by only 11% of informative quartets with a skewed frequency for  
193 alternative discordant topologies (QS score = 0.11/0.6/0.99), and the result of *phyparts* supported this  
194 clade with only 17 of the 387 informative gene trees (4.4%; ICA = 0.03). Node D was recovered in all  
195 nine trees (Supplementary Figs. S1-S9), while this was supported by only 12 of the 383 informative  
196 gene trees with counter-support from ICA (-0.05). Additionally, QS conflict analysis also showed the  
197 weak quartet support (0.32) with a skewed frequency for discordant topologies (0.59). In contrast, node  
198 E was recovered with full QS support (1/-/1) and 157 of the 282 informative gene trees (ICA = 0.29).

### 199 **Coalescence simulation and phylogenetic network analysis**

200 The nuclear gene coalescent simulation analysis showed the distinguished empirical and simulated  
201 gene to gene distance distribution (Fig. 4h), suggesting that ILS alone can not explain most observed  
202 gene tree heterogeneity<sup>61</sup>. Of the 27-taxa dataset at the tribe level, the plot of pseudo-loglikelihood  
203 scores (Fig. 4g) showed that the optimal number of hybridization events inferred in the SNaQ network  
204 analysis was one (Fig. 4g: -ploglik = 5218.4), suggesting the hybrid origin of *Malus doumeri* between  
205 *Docynia delavayi* ( $\gamma = 0.794$ ) and the ancestor of pome related members (i.e., the formerly Maloideae;  $\gamma$   
206 = 0.206). As  $h_{max}$  increased beyond one, the pseudo-loglikelihood increased slightly; therefore, we  
207 considered  $h_{max} = 1$  to be optimal for this 27-taxa dataset.

208 The nuclear gene discordance analysis of the 14-taxa sampling dataset at the *Malus* level showed  
209 much overlap between the empirical and simulated distance distributions. This revealed that ILS alone

210 might explain the observed phylogenomic discordance. Meanwhile, the optimal hybridization event  
211 inferred from SNaQ network analysis was also one (Fig. 5c:  $-\text{ploglik} = 491.5$ ), because the score of  
212 pseudo-loglikelihood levels off when  $h_{\max}$  increased beyond one. *Malus coronaria* was 64.2% sister to a  
213 clade composed of *M. ioensis* and *M. angustifolia*, and 35.8% sister to one Central Asian species, *M.*  
214 *sieversii* (Fig. 5a).

215 We used the filtered HyDe results (i.e.,  $0 < \gamma < 1$ ) for detecting hybridization events. A total of 594  
216 out of the 2448 hypotheses tested by HyDe showed significant evidence of a hybridization event  
217 (Supplementary Table S3), and nearly every species sampled in this study was involved in hybridization.  
218 The  $\gamma$  value for 350 of the 594 hypotheses was greater than 0.7 and less than 0.3, indicating ancient  
219 hybridization events, and only 244  $\gamma$  values were close to 0.5 ( $0.3 < \gamma < 0.7$ ), suggesting recent  
220 hybridization events. *Malus orientalis* has been involved in the most number of hybridization  
221 hypotheses (66), following with *M. coronaria* (54 ones) and *M. sikkimensis* (24 ones).

222 Due to the similar phylogenetic pattern between allopolyploidy and hybridization speciation, we  
223 summarized the chromosome count data for all species available from previous studies (Table 2, Fig. 3)  
224 for distinguishing the phylogenomic discordance from the two mechanisms. Generally, the chromosome  
225 distribution in *Malus* s.l. showed that allopolyploidy may have promoted the diversification of *Malus*.  
226 We did not find allopolyploidy in clade III. However, the various proportion of allopolyploidy cases was  
227 detected in clades I and II.

## 228 **Plastid phylogenetic analysis**

229 The final alignment from 80 plastid coding genes (CDSs) included 75 taxa and 80,799 bp in  
230 aligned length. All three phylogenetic trees from RAxML, IQ-TREE2, and ASTRAL-III recovered the  
231 same topology (Fig. 6 and Supplementary Figs. S12-S14). We presented the topology from RAxML  
232 herein and referred it to as the plastid phylogeny in the following context. Although the plastid result  
233 confirmed the three major clades in the nuclear phylogeny (Fig. 3), their relative phylogenetic position  
234 varied greatly (Fig. 6), and significant cytonuclear discordance showed between the plastid tree and the

235 nuclear phylogeny (Fig. 7). The monophyly of *Malus* s.l. did not recover in the plastid phylogeny, and  
236 the eastern North American and Mediterranean species (clade II) were supported to be sister to  
237 *Pourthiaea* Decne. (Fig. 6). Due to the limited informative sites for each plastid coding gene, the  
238 *phyparts* resulted in nearly completely grey pies for each focal node, i.e., no or very few genes  
239 supported this node (Fig. 6 and Supplementary Fig. S16), suggesting the limited utility of *phyparts* in  
240 shallow phylogenies and/or plastid genes. By contrast, the QS conflict analysis showed full support for  
241 the five focal nodes (1/-/1).

## 242 **Dating and ancestral area reconstruction**

243 The historical biogeographic analysis based on the SCN and plastid datasets using BEAST2  
244 supported the East Asian origin of *Malus* s.l. The Northern Hemisphere disjunct distribution was through  
245 six (SCN data) or five (plastid data) dispersal events (Fig. 8). However, the phylogenetic dating analysis  
246 from SCN and the plastid dataset resulted in different age estimates. Generally, the overall age estimates  
247 in the nuclear data appeared to be older than those estimated from the plastid coding genes (Fig. 8 and  
248 Supplementary Figs. S17, S18). *Malus* s.l. originated from East Asia in the early Eocene, ca. 47.37  
249 million years ago [Mya] in the SCN dating analysis, as compared to 42.16 Mya (95% highest posterior  
250 density (HPD) interval: 41.2-44.39 Mya: Supplementary Fig. S19) in the plastid analysis. The current  
251 disjunct distribution has been stabilized by the late Oligocene (26.42 Mya: 22.91-27.92 Mya: Fig. 8)  
252 based on the SCN result and by the early Miocene (15.14 Mya: 12.55-17.73 Mya: Supplementary Fig.  
253 S17) based on the plastid result. The eastern North American and Mediterranean clade (clade II: Fig. 3)  
254 was estimated to have originated from western North America in the middle Eocene [SCN: 43.58 Mya  
255 (41.2-44.39 Mya) and plastid coding genes: 41.2 Mya: 41.2-46.67 Mya], and then dispersed to the  
256 Mediterranean in the late Eocene [SCN: 39.61 Mya: 36.18-40.81 Mya; plastid coding genes: 35.77 Mya:  
257 33.99-37.99 Mya] through North Atlantic Land Bridge (NALB). The SCN analysis showed that the  
258 eastern North American species originated from the extinct Western North American species in the late  
259 Eocene (34.97 Mya). In contrast, the plastid analysis resulted in the middle Miocene origin (14.18 Mya).

260 Furthermore, our ancestral area reconstruction analysis from the SCN data showed that some *Malus*  
261 members dispersed back to western North America in the early Miocene (20.98 Mya: Fig. 8), which may  
262 be due to the climate oscillations then. However, our plastid result did not present this back dispersal  
263 (Fig. 8). Similarly, the Europe & Central Asia clade originated from an East Asian ancestor in the late  
264 Oligocene (SCN: 26.42 Mya: 22.91-27.92 Mya) and the middle Miocene (plastid coding genes: 15.14  
265 Mya: 12.55-17.73 Mya). Contrastingly, the western North American lineage (*Malus fusca*) was  
266 estimated to have originated from East Asia in the early Oligocene (31.46 Mya: 26.08-34.92 Mya: Fig.  
267 8) and migrated through the BLB by the SCN data, while it originated from Europe & Central Asia in  
268 the late Miocene (8.6 Mya: 6.46-10.91 Mya: Supplementary Fig. S17) and likely migrated through the  
269 NALB based on the plastid coding gene data.

## 270 Discussion

271 This study integrated hundreds of SCN genes and plastomes to resolve the backbone of *Malus* s.l.  
272 The potential roles of ILS, hybridization, and allopolyploidy for the underlying phylogenetic  
273 discordance are herein evaluated. We also elucidate the biogeographic diversification patterns of the  
274 widespread disjunct distributions in the Northern Hemisphere. Our results support the paraphyly of the  
275 apple genus *Malus*, with *Docynia* nested within it, and recovered three strongly supported major clades  
276 within *Malus* s.l. except for the unstable phylogenetic placements of *M. coronaria* and *M. sikkimensis* in  
277 different trees. Furthermore, our coalescent simulation analysis demonstrated that ILS is not the sole or  
278 dominant cause of phylogenomic conflict, and other processes (e.g., hybridization and allopolyploidy)  
279 may have driven the discordance. The phylogenetic network analysis at the *Malus* and the Maleae levels  
280 supported the hybrid origin of *M. coronaria* and *M. doumeri*, and the further gene tree discordance  
281 analysis (e.g., *phyparts*, QS, *phyckle*, and HyDe) promoted the understanding of underlying conflict at  
282 some nodes. Below we will integrate several lines of evidence to discuss the potential causes of  
283 conflicts.

284 **The phylogenetic backbone and an early chloroplast capture event in *Malus* s.l.**

285 The taxonomic circumscription of *Malus* s.l. has been controversial due to the phylogenetic  
286 position of *Docynia*. With the highly distinctive numbers of ovules per locule (3-10 in *Docynia* vs. 2 in  
287 *Malus*), *Docynia* has been recognized as a separate genus by taxonomists historically<sup>1,5,6,10,74-77</sup>. The  
288 nuclear and plastid phylogeny from hundreds of SCN genes in our study supported the paraphyly of  
289 *Malus* s.s., with *Docynia* nested within it (Figs. 3, 4), and this was consistent with the phylogenetic  
290 inferences in several recent molecular studies<sup>18,21,22</sup> (Fig. 1). *Docynia delavayi* (clade VIII: Fig. 3) was  
291 the sister of *Malus doumeri* (clade VII: Fig. 3), a species formerly treated in the *Malus* sect. *Docyniopsis*  
292 or the genus *Docyniopsis* (C.K.Schneid.) Koidz.. Several shared characteristics supported a close  
293 relationship between these species, i.e., cone-shaped non-adnate part of the ovaries, fully connate  
294 carpels, incurved and persistent calyx, numerous scattered sclereids throughout the flesh, juvenile leaves  
295 deeply lobed, and similar flavonoid chemistry<sup>1,5,78</sup>. Robertson et al. (1991) proposed to merge *Docynia*  
296 into *Docyniopsis* (= *Malus* sect. *Docyniopsis*) based on these shared characters. Given the more ovules  
297 per locule (more than 2), *Docynia* was treated in *Cydonia* Mill. by Roemer (1847) and Wenzig (1883),  
298 and this treatment was not supported by our strongly supported nuclear and plastid phylogeny.  
299 Furthermore, several characters may easily distinguish *Docynia* from *Cydonia*, such as ovaries partially  
300 adnate to hypanthium in *Docynia* vs. fully adnate in *Cydonia*, styles fused at the base in *Docynia* vs. free  
301 in *Cydonia*, and stamens ca. 40 in *Docynia* vs. 25 in *Cydonia*<sup>1,5</sup>. Hence, the above lines of evidence  
302 support a redefined circumscription of *Malus* s.l., by merging *Docynia* into *Malus*.

303 Our nuclear phylogeny recovered three major clades within *Malus* s.l.; however, cytonuclear  
304 discordance was detected for the placement of clade II, i.e., the combined eastern North American and  
305 Mediterranean species. Clade II was sister to clade III in the nuclear phylogeny (Fig. 3), while sister to  
306 another East Asian genus *Pourthiaea* in the plastid phylogeny (Figs. 4, 7). Several possible causes may  
307 explain the conflict between nuclear and plastid topologies, such as ILS, allopolyploidy, and  
308 hybridization<sup>79</sup>. Our coalescence simulation analysis showed that no simulated nuclear genes were

309 concordant to the plastid tree, the well-supported incongruence of the clade II between the nuclear and  
310 plastid trees may not be explained by ILS (Fig. 7). Allopolyploidy could be excluded for explaining the  
311 discordance (Fig. 3, Table 2). Although the eastern Northern American species have been involved in  
312 diploidy, triploidy, and tetraploidy<sup>3,65</sup>, the two Mediterranean species were consistently diploid<sup>65,73</sup>. It is  
313 less likely that allopolyploidy has resulted in cytonuclear discordance.

314 Hybridization might be the underlying mechanism for explaining the conflicts between nuclear and  
315 plastid topologies (Fig. 7), especially in the context of the chloroplast capture hypothesis, which has  
316 been well illustrated by recent studies<sup>21,38,80</sup>. The chloroplast capture events have also been used to  
317 explain the topological conflicts in the AMP (*Amelanchier-Malacomelels-Peraphyllum*) clade of  
318 Maleae<sup>21</sup>. Furthermore, hybridization has played an essential role in the diversification of the apple tribe  
319 (Maleae)<sup>5</sup>. Our ancestral area reconstruction showed that the clade II originated from western North  
320 America in the middle Eocene (Fig. 8 and Supplementary Fig. S17). The shared plastomes between  
321 clade II and *Pourthiaea* implicated that the ancestor of clade II most likely captured the plastome of the  
322 ancestor of *Pourthiaea* in western North America, and the ancestor of *Pourthiaea* may have been widely  
323 distributed in the boreotropical flora of the Northern Hemisphere in Eocene<sup>45,81</sup>. According to the  
324 chloroplast capture scenario of Liu et al. (2020a), we hypothesize that the ancestor of clade II might  
325 have been widely distributed in western North America, and served as the paternal parent of the hybrid.  
326 The pollen provider (the ancestor of the clade II) hybridized with the ancestor of *Pourthiaea* (the ovule  
327 provider), and formed the hybrid founder population. Subsequent backcrossings with the paternal parent  
328 promoted that the ancestor of clade II captured the complete plastome of the ancestor of *Pourthiaea*.  
329 Morphologically, clade II showed similarities to *Pourthiaea*, such as the densely scattered sclereids in  
330 the flesh of fruits<sup>5,82-84</sup>.

331 **Ancient and recent events of hybridization and allopolyploidy drive the diversification of *Malus***

332 **s.l.**

333 Rapid diversification and reticulate evolution pose significant challenges for phylogenetic inference  
334 of *Malus* s.l. This study resolved three strongly supported clades using hundreds of SCN genes.  
335 However, underlying gene tree conflicts for most nodes showed the potential hybridization and  
336 allopolyploidy events in the early diversification of *Malus* s.l.<sup>5,85</sup>.

337 Our phylogenetic network analysis at the Maleae level confirmed one hybridization event, i.e., the  
338 hybrid origin of *Malus doumeri* between *Docynia delavayi* and the ancestor of the pome-related  
339 members of Maleae (Fig. 4), supporting an ancient hybridization event in the evolutionary history of  
340 Maleae. *Malus doumeri* is a diploid<sup>63,64</sup> ( $2n = 34$ ); hence its origin did not involve an  
341 allopolyploidy event. Additionally, Our HyDe analysis detected 34 significant hybridization hypotheses  
342 that supported the hybrid origin of *M. doumeri*, and 25 out of 34 ( $\gamma < 0.3$  and  $\gamma > 0.7$ ) ones supported the  
343 ancient hybridization hypothesis.

344 Although the hybrid origin of *Malus coronaria* was estimated from the SNaQ analysis, the  
345 distribution of chromosome count data ( $2n = 34, 51, 68$ ) indicated that allopolyploidy might have been  
346 involved in the speciation of *M. coronaria*, because the result of allopolyploidy event may have  
347 resembled that of hybridization<sup>86</sup>. In addition, our HyDe analysis showed that 27 of the 54 significant  $\gamma$   
348 values supported the ancient hybridization events, and the same number of significant  $\gamma$  values (27)  
349 confirmed the recent hybridization events. However, an alternative hypothesis may explain this genetic  
350 admixture. With the wide naturalization of the European and the Central Asian species (*M. sylvestris*, *M.*  
351 *sieversii*, and *M. orientalis*) in eastern North America, the two individuals sampled in this study may  
352 represent a recent hybrid in the wild or horticulture. We need to test more samples of *M. coronaria* from  
353 its distributional range.

354 The phylogenetic conflicting positions of *Malus sikkimensis* among nine inferred topologies  
355 (Supplementary Figs. S1-S9) suggested its genetic heterogeneity, which also implicated by far more



356 gene trees in conflict with the species tree than in concord (6/370) in the *phyparts* analysis and the  
357 limited QS quartets (0.4/0.76/0.99) (Fig. 3 and Supplementary Fig. S10). We suggest that allopolyploidy  
358 might have resulted in the phylogenetic discordance of *Malus sikkimensis* (Fig. 3) based on the uneven  
359 gene trees supporting each bipartition (Table 1). Other lines of evidence also support this hypothesis.  
360 The chromosome count of *M. sikkimensis* varied from diploid to tetraploid (Fig. 3, Table 2).  
361 Additionally, an equal number of significant ancient and recent hybridization events (12 : 12:  
362 Supplementary Table S2) estimated by HyDe analysis showed that frequent hybridization might have  
363 played an important role in the diversification of *M. sikkimensis*, which might have introgressed with  
364 other species in ancient and recent times.

365 Although the sister relationship between *Malus baccata* var. *xiaojinensis* and clade I (Fig 2) has  
366 been fully supported in all nine nuclear topologies (Supplementary Figs. S1-S9) and the nearly full  
367 support of the QS analysis (Supplementary Fig. S10), only 23 out of the 319 informative gene trees  
368 confirmed this relationship in the *phyparts* analysis (Supplementary Fig. S11). A series of previous  
369 studies have demonstrated exclusive apomixis for *M. baccata* var. *xiaojinensis*<sup>87</sup>. They may have derived  
370 from the hybridization events between *M. kansuensis* and *M. toringoides*<sup>88</sup>.

## 371 **An East Asian-western North American origin of *Malus* s.l. and its subsequent extinctions in the** 372 **Eocene**

373 Our historical biogeographic analysis inferred East Asian + western North America as the most  
374 likely ancestral area of *Malus* s.l. (Fig. 8). The common ancestor is postulated to have occupied a  
375 widespread East Asian-western North American range, consistent with the rich fossil records of clade II  
376 and III recovered in northeast Asia and western North America from Eocene to Pliocene (Table 3).  
377 However, we did not find any fossil records of clade I from southern East Asia, which may be due to the  
378 underexplored fossil discovery for this region. This result disagrees with the North American origin or  
379 the East Asian origin, as proposed by Nikiforova et al. (2013) and Jin (2014), respectively. The

380 conflicted hypothesis on the *Malus* origin may be due to the absence of fossil records and the uneven  
381 sampling in the two prior analyses. Nikiforova et al. (2013)'s investigation did not include taxa of clade  
382 III (*Malus doumeri* and *Docynia delavayi*), and Jin (2014)'s study misidentified *Pseudocydonia sinensis*  
383 to be *Docynia delavayi*.

384 Our divergence time estimation suggested that three major clades of *Malus* diversified in the late  
385 Oligocene (43.58 Mya, 95% HPD interval: 41.2-44.39 Mya). Due to the decreased CO<sub>2</sub> principal forcing  
386 and long-term cooling trend from the early Eocene, the high latitude *Malus* (clade III) from northern  
387 East Asia migrated to southern East Asia; the ancient western North American populations dispersed to  
388 eastern North America and the Mediterranean region (clade II: Fig. 8). Subsequent extinctions occurred  
389 in the northern cold area from the Eocene to the Quaternary because a series of fossil species from  
390 different eras have been discovered in northern East Asia (*Malus kingiensis* in the Eocene, *M.*  
391 *parahupehensis* in the Miocene, and *M. obensis* in the Pliocene: Table 3) and western North America  
392 (*M. collardii*, *M. florissantensis*, and *M. pseudocredneria* in the Eocene, and *M. idahoensis* in the  
393 Miocene: Table 3). These extinction events in northern East Asia may be related to the cooling events in  
394 geologic times, such as the Miocene cooling and drying occurred at approximately 15-10 Mya<sup>89-91</sup> and  
395 the enhanced aridity at the middle latitudes of the Northern Hemisphere at about 8-7 Mya<sup>92,93</sup>. The living  
396 species of clade III show preferences to cool habitats in the high altitudes of southern East Asia,  
397 suggesting the northern East Asian origin of clade III, such as *Malus doumeri* at 700-2400 m and  
398 *Docynia delavayi* at 1000-3000 m<sup>2</sup>. This distribution pattern has also been reported in many other  
399 angiosperm lineages, such as *Astilbe* Buch.-Ham. ex D. Don<sup>94</sup>, *Meehania* Britton ex Small & Vail<sup>95</sup>,  
400 *Mitchella* L.<sup>96</sup>, *Parthenocissus* Planch.<sup>97</sup>, and *Vitis* L.<sup>98</sup>. The extinctions of the early diverged *Malus* in  
401 western North America may be due to the increasing seasonality and drying spreading in the western  
402 Cordillera and cooling events into the Pleistocene<sup>99-101</sup>. The warm and moist environment in southern  
403 East Asia, eastern North America, and the Mediterranean promoted its survival in the refugia for *Malus*  
404 there, and the dispersal and vicariance events in the middle to late Eocene further facilitated its survival  
405 diversification across the Northern Hemisphere (Fig. 8).

## 406 **Materials & Methods**

### 407 **Taxon sampling, library preparation, and deep genome skimming sequencing**

408 Taxon sampling is designed to resolve the phylogenetic placements and relationships of major  
409 clades within *Malus* s.l. For the convenience of discussion, we followed the widely accepted taxonomic  
410 system proposed by Phipps et al. (1990), in which they recognized five sections. Due to the great  
411 economic importance of *Malus*, numerous hybrid cultivars have been used as crops and ornamentals,  
412 which have hybridized either within one section or between sections, and this made it difficult to infer  
413 the phylogenetic relationships between cultivated and wild species. Hence, we excluded the widely  
414 recognized artificial hybrid species in *Malus*, e.g., *M. × asiatica* Nakai, *M. × astracanica* hort. ex  
415 Dum.Cours., *M. × cerasifera* Spach, *M. × dawsoniana* Rehder, *M. × domestica* (= *M. pumila* Mill.), *M.*  
416 *× floribunda* Siebold ex Van Houtte, *M. × halliana*, *M. × micromalus*, *M. × heterophylla* Spach, *M. ×*  
417 *magdeburgensis* Schoch ex Rehder, *M. × prunifolia* (Willd.) Borkh., *M. × sargentii* Rehder, *M. ×*  
418 *scheideckeri* Späth ex Zabel, *M. × soulardii* (L.H.Bailey) Britton, *M. × spectabilis* (Aiton) Borkh., and  
419 *M. × sublobata* Rehder. We hence sampled 39 ingroup individuals representing 18 wild species (out of  
420 ca. 24<sup>15</sup>), representing all five sections and *Docynia* within *Malus* s.l. In addition, due to the potential  
421 biphyly of *Malus* based on complete plastomes<sup>21,103</sup>, we sampled 38 outgroups across the tribes Maleae  
422 and Gillenieae to resolve the *Malus* phylogeny and identify possible events of cytonuclear discordance  
423 (Supplementary Table S1). We investigated 77 individuals in total, of which 27 species of deep genome  
424 skimming data were generated for this study (Supplementary Table S1).

425 Total genomic DNAs were extracted from silica-gel dried leaves or herbarium specimens using a  
426 modified CTAB (mCTAB) method<sup>104</sup> in the lab of the Institute of Botany, Chinese Academy of Science  
427 (IBCAS) in China. The libraries were prepared in the lab of Novogene, Beijing, China using NEBNext<sup>®</sup>  
428 Ultra<sup>™</sup> II DNA Library Prep Kit, and then paired-end reads of 2 × 150 bp were generated on the  
429 NovoSeq 6000 Sequencing System (Novogene, Beijing; 5-10 G data for each sample: Supplementary

430 Table S1).

### 431 **Single-copy nuclear marker development**

432 The SCN marker development followed the pipeline in Liu et al. (2021). Briefly, the coding regions  
433 of *Malus domestica* (GenBank assembly accession: GCA\_000148765.2) were first input into  
434 MarkerMiner v.1.0<sup>105</sup> to identify the putative single-copy genes. The resulting genes were then filtered  
435 by successively BLASTing<sup>106-108</sup> against six available genomes [*Malus baccata* (accession:  
436 GCA\_006547085.1), *M. domestica*, *Pyrus betulifolia* Bunge (accession: GCA\_007844245.1), *P.*  
437 *bretschneideri* Rehder (accession: GCA\_000315295.1), *P. ussuriensis* Maxim. × *P. communis* L.  
438 (accession: GCA\_008932095.1), and *P. pyrifolia* (Burm.f.) Nakai (accession: GCA\_016587475.1)] in  
439 Geneious Prime<sup>109</sup>, with the parameters settings in the Megablast program<sup>110</sup> as a maximum of 60 hits, a  
440 maximum E-value of  $1 \times 10^{-10}$ , a linear gap cost, a word size of 28, and scores of 1 for match and -2 for  
441 mismatch in alignments. We first excluded genes with mean coverage > 1.1 for alignments, which  
442 generally indicate potential paralogy of the genes and/or the presence of highly repeated elements in the  
443 sequences. The remaining alignments were further visually examined to exclude those genes receiving  
444 multiple hits with long overlapping but different sequences during the BLAST. It should be noted that  
445 the alignments with mean coverage between 1.0 and 1.1 were generally caused by the presence of tiny  
446 pieces of flanking intron sequences in the alignments. These fragments were still accepted as a SCN  
447 gene here. After filtering, the remaining genes were used as references in the following gene assembly.  
448 The baits *in silico* could be available from the Dryad Digital Repository (Data 1):  
449 <https://doi.org/10.5061/dryad.2jm63xsq5>.

### 450 **Data processing and the assembly of single-copy nuclear genes**

451 Read processing and assembly followed the pipeline in Liu et al. (2021). Generally, we used  
452 Trimmomatic v. 0.39<sup>111</sup> for quality trimming and adapter clipping with the parameters  
453 (ILLUMINACLIP:TruSeq3-PE.fa:2:30:10:1:true LEADING:3 TRAILING:3 SLIDINGWINDOW:4:15

454 MINLEN:36). Then, the results were quality-checked with FastQC v. 0.11.9<sup>112</sup>. The number of clean  
455 reads after trimming was also calculated here for comparison (Supplementary Table S1). We used the  
456 HybPiper pipeline v. 1.3.1<sup>113</sup> for targeting SCN genes with default settings; BWA v. 0.7.1<sup>114</sup> to align and  
457 distribute reads to target genes; SPAdes v. 3.15.0<sup>115</sup> with a coverage cutoff value of 8 to assemble reads  
458 to contigs; and Exonerate v. 2.2.0<sup>116</sup> to align assembled contigs to target sequences and determine exon-  
459 intron boundaries. Python and R scripts included in the HybPiper pipeline<sup>113</sup> were used to retrieve the  
460 recovered gene sequences, summarize and visualize the recovery efficiency.

### 461 **Nuclear datasets construction and phylogenetic analysis**

462 Sequences for each SCN were aligned in MAFFT v. 7.480<sup>117</sup> with options “--localpair --maxiterate  
463 1000”. Due to the variable sequencing coverage of each sample in this study, we employed three steps to  
464 remove the poorly aligned regions. We used trimAL v. 1.2<sup>118</sup> to trim the alignment of each SCN, in  
465 which all columns with gaps in more than 20% of the sequences or with a similarity score lower than  
466 0.001 were removed. Given the low-quality assembly in some sequences, Spruceup<sup>119</sup> was used to  
467 discover, visualize, and remove outlier sequences in the concatenated multiple sequence alignments with  
468 the window size 50 and overlap 25. Because the Spruceup algorithm works better, the more data it has,  
469 we concatenated all the SCN gene alignments with AMAS v. 1.0<sup>120</sup> before running Spruceup. We also  
470 used AMAS v. 1.0<sup>120</sup> to split the processed/trimmed alignment back into single-locus alignments. The  
471 resulting alignments for each SCN were trimmed again using trimAL v. 1.2<sup>118</sup> with the same parameters  
472 described above. Thirdly, we excluded the sequences less than 250 bp in each alignment with our  
473 customized python script (exclude\_short\_sequences.py, which can be available from Dryad Digital  
474 Repository <https://doi.org/10.5061/dryad.2jm63xsq5>) for decreasing the effect of missing data, because  
475 the short sequences in each alignment have few informative sites for the following coalescent-based  
476 species tree inference. The resulting SCN genes were used to infer individual ML gene trees using  
477 RAxML 8.2.12<sup>121</sup> with a GTRGAMMA model and the option “-f a” and 200 BS replicates to assess  
478 clade support for each SCN. TreeShrink v. 1.3.9<sup>122</sup> was used for detecting abnormally long branches in

479 each tree with the default false positive error rate  $\alpha = 0.05$  and per-species mode. The shrunk trees and  
480 sequences have been used for the following phylogenetic inference, and hereafter these resulted  
481 sequences were referred to as “clean genes”.

482 We generated three different datasets to reconstruct the phylogeny to account for the effect of  
483 missing data in each SCN gene: (1) 50%-sample dataset: each SCN gene with at least 900 bp and more  
484 than 50% samples ( $\geq 39$  individuals); (2) 80%-sample dataset: each SCN gene with at least 900 bp and  
485 more than 80% samples ( $\geq 62$  individuals); (3) all-sample dataset: each SCN with at least 900 bp and  
486 more than 100% samples (77 individuals). These three datasets can be available from the Dryad Digital  
487 Repository (Data 2, 3, 4): <https://doi.org/10.5061/dryad.2jm63xsq5>. We used both concatenated and  
488 coalescent-based methods for phylogenetic inference of each dataset. We used PartitionFinder2<sup>123,124</sup> to  
489 estimate the best-fit partitioning schemes and/or nucleotide substitution models under the corrected  
490 Akaike information criterion (AICc) and linked branch lengths, as well as with rcluster<sup>125</sup> algorithm  
491 options for the nuclear dataset. The resulting partitioning schemes and evolutionary models were used  
492 for the following Maximum Likelihood (ML) tree using IQ-TREE2 v. 2.1.3<sup>126</sup> with 1000 SH-aLRT and  
493 the ultrafast bootstrap replicates and RAxML 8.2.12<sup>121</sup> with GTRGAMMA model for each partition and  
494 clade support assessed with 200 rapid bootstrap (BS) replicates. The shrunk trees from TreeShrink<sup>122</sup>  
495 were used to estimate a coalescent-based species tree with ASTRAL-III (Zhang et al., 2018) using local  
496 posterior probabilities (LPP)<sup>127</sup> to assess clade support. Each of the gene trees was rooted, and low  
497 support branches ( $\leq 10$ ) were collapsed using Newick Utilities<sup>128</sup> or *phyc*<sup>129</sup> since collapsing gene tree  
498 nodes with BS support below a threshold value will help to improve accuracy<sup>130</sup>. In total, nine  
499 phylogenies were generated for topological comparison, and these nine trees are available from the  
500 Dryad Digital Repository: <https://doi.org/10.5061/dryad.2jm63xsq5>.

### 501 **Detecting and visualizing nuclear gene tree discordance**

502 To explore the discordance among gene trees, we employed *phyparts* v. 0.0.1<sup>29</sup> to calculate the  
503 conflicting/concordant bipartitions by comparing the nuclear gene trees against the ML tree inferred

504 from RAxML with a BS threshold of 50 (i.e., gene-tree branches/nodes with less than 50% BS were  
505 considered uninformative) for filtering out poorly supported branches, thus alleviating noise in the  
506 results of the conflict analysis<sup>29</sup>. We also used the internode certainty all (ICA) value that resulted from  
507 *phyparts* to quantify the degree of conflict on each node of a species tree given individual gene trees<sup>131</sup>.  
508 *Phyparts* results were visualized with *phypartspiecharts.py* (by Matt Johnson, available from  
509 <https://github.com/mossmatters/MJPythonNotebooks/blob/master/phypartspiecharts.py>). Furthermore, in  
510 order to distinguish lack of support from conflicting support in the species tree, we conducted Quartet  
511 Sampling (QS)<sup>41</sup> analysis with 100 replicates and the log-likelihood cutoff 2. The QS method  
512 subsamples quartets from the input tree and alignment to assess the confidence, consistency, and  
513 informativeness of internal tree relationships, and the reliability of each terminal branch, and then four  
514 values are given in this analysis: QC = Quartet Concordance, QD = Quartet Differential, QI = Quartet  
515 Informativeness, and QF = Quartet Fidelity. The QS result was visualized with *plot\_QC\_ggtree.R* (by  
516 ShuiyinLIU, available from [https://github.com/ShuiyinLIU/QS\\_visualization](https://github.com/ShuiyinLIU/QS_visualization)). Both the *phyparts* and  
517 QS results can provide alternative evidence for evaluating the discordance between gene trees.

518 Comparing the nine topologies inferred above, we found two species (*Malus coronaria* and *M.*  
519 *kansuensis*) with conflicting phylogenetic positions among trees (referring to the result below). We used  
520 the “alternative relationship test” in *phyckle*<sup>28</sup> to investigate conflicting bipartitions and discover the  
521 gene trees supporting each bipartition. Considering the complex origin of *Malus coronaria*, we  
522 employed the two bipartitions supported by Phylonetworks analysis (see Fig. 4 & Table 1 in Results).  
523 Two or more user-specified alternative bipartitions could be used as a constraint to infer gene trees.  
524 Arbitrarily, we set the cutoff of  $\Delta\ln L > 100$  as the outlier genes<sup>132</sup>. The resulting gene dataset supporting  
525 each bipartition was then used to estimate phylogenetic inference based on the concatenated (IQ-TREE2  
526 and RAxML) and coalescent-based methods (ASTRAL-III) mentioned above. The resulting 12 trees  
527 could be available from the Dryad Digital Repository: <https://doi.org/10.5061/dryad.2jm63xsq5>.



## 528 **Coalescence simulation and phylogenetic network estimation**

529 To measure the goodness-of-fit of the coalescent model with ILS explaining the gene tree  
530 discordance adequately, we performed a coalescent simulation analysis following the methods in  
531 previous studies<sup>34,133-135</sup>. Briefly, if the simulated gene trees based on the coalescent model correspond  
532 well to the empirical gene trees, the gene tree discordance may be explained by ILS. Given the  
533 calculation of gene tree distances, we subsampled 27 species representing each major clade in the  
534 phylogenetic framework of the tribe Maleae. The function “sim.coaltree.sp” implemented in the R  
535 package Phybase v. 1.5<sup>136</sup> has been used to simulate 10,000 gene trees with the multispecies coalescent  
536 (MSC) model.

537 Hybrid Detector (HyDe) can be used to detect hybridization using phylogenetic invariants arising  
538 under the coalescent model with hybridization<sup>137</sup>. We sampled 40 taxa, including all 39 *Malus* s.l.  
539 individuals and one outgroup (*Pyrus communis*) to detect the possible hybridization events within *Malus*  
540 s.l. This dataset can be available from the Dryad Digital Repository (Data 6):  
541 <https://doi.org/10.5061/dryad.2jm63xsq5>. The  $\gamma$  denotes the inheritance probability of parent 1 (P1),  
542 while  $1 - \gamma$  would be the probability of the hybrid population being sister to parent 2 (P2). Generally,  
543 significant  $\gamma$  values close to 0.5 indicate a recent hybridization event; significant  $\gamma$  values closer to 0 or 1  
544 indicate an ancient hybridization event remained in the extant species. We herein set the  $\gamma$  threshold at  
545 0.3 and 0.7, which followed convention<sup>132</sup>.

546 To explore the possibility of reticulation as a cause of discordance in the apples and their allies, we  
547 employed the Species Networks applying Quartets (SNaQ) method<sup>43</sup> implemented in the software  
548 PhyloNetworks 0.14.0<sup>44</sup>, which explicitly accommodates introgression/gene flow and ILS. Given the  
549 computational limitation of PhyloNetworks, we used two datasets to test for hybridization events, i.e.,  
550 27-taxa sampling at the tribe level of Maleae and 14-taxa sampling at the genus level of *Malus*. These  
551 two datasets are available from the Dryad Digital Repository (Data 7 & 8):  
552 <https://doi.org/10.5061/dryad.2jm63xsq5>. Considering that *Malus* members have been reported to have  
553 hybridized with many genera in Maleae, e.g., *Aria* (Pers.) Host and *Torminaria* M.Roem.<sup>5</sup>, we sampled

554 27 individuals, including five species representing each major clade in *Malus* s.l. and 22 outgroup  
555 species in Maleae. This taxon sampling scheme represents a reasonable compromise between taxonomic  
556 coverage and computational cost. The 27-taxa dataset construction followed the method described above  
557 (i.e., Nuclear dataset construction and phylogenetic analysis). The best trees generated from RAxML  
558 were used to estimate the quartet concordance factors (CFs), representing the proportion of genes  
559 supporting each possible relationship between each set of four species. The resulting CFs and the  
560 ASTRAL species tree were used as initial input to run SNaQ analysis ( $h = 0$ ), and the resulting best  
561 network was used as starting topology to run the next  $h$  value ( $h + 1$ ), and so on. We investigated  $h$   
562 values ranging from 0 to 5 with 50 runs in each  $h$  for estimating the best phylogenetic network. Each run  
563 generated a pseudo-deviance score: a value for fitting the network to the data, and estimated the  
564 inheritance probabilities (i.e. the proportion of genes contributed by each parental population to a hybrid  
565 taxon) for each network. Similarly, we also sampled 14 species, including 13 *Malus* species and one  
566 outgroup (*Pyrus communis*), to test the hybridization events among *Malus* members. The method  
567 followed that of the 27-taxa sampling dataset mentioned above. The best network was visualized using  
568 Dendroscope v 3.7.4<sup>138</sup>.

### 569 **Plastome assembly, annotation, phylogenetic analysis, and cytonuclear discordance**

570 A two-step strategy was used for obtaining high-quality chloroplast genomes. NOVOPlasty v.  
571 4.3.1<sup>139</sup> was applied first to assemble the plastomes with high-quality raw data. Then we used the  
572 successive assembly approach<sup>140</sup>, combining the reference-based and the *de novo* assembly methods to  
573 assemble the remaining low-quality samples. With the *de novo* assembly and a seed-and-extend  
574 algorithm, NOVOPlasty was the least laborious approach and resulted in accurate plastomes; however,  
575 this program needs sufficient high-quality raw reads without gaps to cover the whole plastome. The  
576 whole plastomes assembled from NOVOPlasty then could be used as references for assembling the  
577 remaining samples. The successive method provided an excellent approach to obtaining relatively  
578 accurate and nearly complete plastomes with or without gaps from lower-coverage raw data. Due to the

579 sensitivity of Bowtie2 v. 2.4.2<sup>141</sup> to the reference, this successive method needs a closely related  
580 reference sequence with increased time and RAM requirements. Several recent studies have described  
581 the procedure in detail<sup>21,60,103,140,142,143</sup>. All assembled plastomes have been submitted to GenBank with  
582 the accession numbers listed in Supplementary Table S1.

583 The assembled plastid genomes from the low-coverage and high-coverage datasets were annotated  
584 using PGA<sup>144</sup> with a closely related plastome (MN062004: *Malus ioensis*) downloaded from GenBank  
585 as the reference, and the results of automated annotation were checked manually. The coding sequences  
586 of plastomes were translated into proteins to manually check the start and stop codons in Geneious  
587 Prime<sup>109</sup>. The custom annotations in the GenBank format were converted into the FASTA format, and  
588 five-column feature tables file required by NCBI submission using GB2sequin<sup>145</sup>.

589 Given the considerable variation among plastid introns at the level of Maleae, we extracted 80  
590 coding genes (CDSs) using Geneious Prime<sup>109</sup>, and these CDSs were aligned by MAFFT v. 7.475<sup>117</sup>  
591 with default parameters, respectively. This dataset with 77 samples and 80 plastid coding genes is  
592 available from the Dryad Digital Repository (Data 5): <https://doi.org/10.5061/dryad.2jm63xsq5>. The  
593 best-fit partitioning schemes and/or nucleotide substitution models for each dataset were estimated using  
594 PartitionFinder2<sup>123,124</sup>, under the corrected Akaike information criterion (AICc) and linked branch  
595 lengths, as well as with recluster<sup>125</sup> algorithm options. The partitioning schemes and evolutionary model  
596 for each subset were used for the downstream phylogenetic analysis. Like the nuclear analysis, we  
597 estimated the ML tree by IQ-TREE2 v. 2.1.3<sup>126</sup> with 1000 SH-aLRT and the ultrafast bootstrap replicates  
598 and RAxML 8.2.12<sup>121</sup> with GTRGAMMA model for each partition and clade support assessed with 200  
599 rapid BS replicates. We also used ASTRAL-III<sup>130</sup> for estimating a coalescent-based species tree. These  
600 three trees are available from the Dryad Digital Repository: <https://doi.org/10.5061/dryad.2jm63xsq5>.  
601 Cytonuclear discordance at various levels was detected in *Malus* s.l. (Fig. 7); coalescent simulation was  
602 also employed for evaluating the importance of ILS in explaining cytonuclear discordance<sup>35,135</sup>. We used  
603 the R package Phybase v. 1.5 to simulate 10,000 gene trees based on the ASTRAL species tree from  
604 SCN genes under MSC model. We used *Phyparts* v. 0.01<sup>29</sup> to explore conflicts among the simulated

605 gene trees and plastid tree, and the proportion of gene tree concordance compared to the plastid genome  
606 tree was used to qualify the discordance.

### 607 **Dating and ancestral area reconstruction**

608 We aim to estimate the age of divergence of the three major clades identified from hundreds of  
609 SCN genes and 80 plastid coding genes in *Malus* s.l. The fossils used in this study are listed in Table 3.  
610 *Malus obensis* and the clade *Malus doumeri* - *Docynia delavayi* were grouped together because of the  
611 fruit similarity. *Malus parahupehensis* was thought to be similar to the living species *M. hupehensis*;  
612 however, this fossil species showed more similarities to *M. doumeri* because of the dentate margin and  
613 parallel, craspedodromous venation<sup>15</sup>. Thus, we grouped *M. parahupehensis*, *M. doumeri*, *M. obensis*,  
614 and *Docynia delavayi* as monophyletic. The earliest fossil, *Malus kingiensis*, was found in the middle  
615 Eocene from the western Kamchatka peninsula and can not be assigned to any living lineages of *Malus*  
616 s.l. based on the morphology; thus, this fossil species likely represented the stem clade of *Malus*  
617 *doumeri* and *Docynia delavayi*. However, only one fossil, *Malus antiqua*, was found in Europe, and this  
618 fossil with deeply lobed leaves was similar to the Mediterranean species. Therefore, we grouped this  
619 fossil with the two Mediterranean living species (*M. florentina* and *Eriolobus trilobatus*). Five fossil  
620 species were described from North America, especially the abundant fossil records in western North  
621 America. More or less deeply lobed leaves characterized all these leaf fossils, significantly distinct from  
622 the living western North American species (*Malus fusca*). They showed more similarities to the eastern  
623 North American and Mediterranean species, and these species were thus grouped together. Additionally,  
624 leaf fossil of *Malus* or *Pyrus* from the Republic site, Washington<sup>146</sup> was used to constrain the divergence  
625 between *Malus* and *Pyrus* at 46-44 Mya.

626 We ran the dating analyses based on the SCN and plastid datasets to test the divergence time  
627 differences with significant cytonuclear discordance. Given the intensive computational burden of dating  
628 analysis using BEAST2, we employed a 19-taxa dataset with only one individual for each species in  
629 *Malus* s.l. and *Pyrus communis* as the outgroup, and this dataset is available from the Dryad Digital

630 Repository (Data 13): <https://doi.org/10.5061/dryad.2jm63xsq5>. The divergence time estimation was run  
631 under a GTR model with a gamma rate inferred from PartitionFinder2<sup>123,124</sup>, an uncorrelated lognormal  
632 relaxed clock<sup>147</sup>, and the fossilized birth-death model<sup>148,149</sup>. Markov Chain Monte Carlo (MCMC)  
633 chains were run for 100,000,000, sampling every 20,000 generations in five parallel jobs. We used the  
634 LogCombiner v1.10 to combine log and tree files from the five independent runs of BEAST. The  
635 MCMC trace file was analyzed in Tracer v1.7.1<sup>150</sup>. Maximum credibility trees were generated in  
636 TreeAnnotator v1.10, and FigTree v1.4.4 visualized the MCC tree.

637 To test the ancestral areas of three major clades of *Malus*, we conducted the ancestral area  
638 construction using BioGeoBEARS v. 1.1.1<sup>151</sup> implemented in RASP v. 4.2<sup>152</sup>. Geological evidence  
639 suggests that an aridity barrier existed from the western-most part of China to the eastern Asian coast  
640 from the Paleogene to the Miocene. It has been hypothesized to have acted as a climate barrier between  
641 these two regions<sup>153</sup>; thus, we subdivided East Asia into the northern and the southern areas<sup>154-159</sup>. Six  
642 biogeographic areas were defined across the distribution of *Malus* s.l.: (A), Southern East Asia; (B),  
643 Northern East Asia; (C), Europe and Central Asia; (D), Mediterranean; (E), eastern North America; (F),  
644 western North America. The MCC tree summarized by TreeAnnotator was used as input of RASP. The  
645 *maxarea* was set to six, i.e., the number of potential areas of a hypothetical ancestor was restricted to a  
646 maximum of six regions. The model with the highest AICc\_wt value has been chosen as the best model.

## 647 **Conclusions**

648 We resolved the phylogenetic backbone of *Malus* s.l. using 785 nuclear loci (77 taxa) and 80 plastid  
649 coding genes (75 taxa). The nuclear phylogeny supported the monophyly of *Malus* s.l. (including  
650 *Docynia*) and three strongly supported major clades within the genus. However, widespread gene tree  
651 conflicts among nuclear gene trees indicated the complicated evolutionary history of *Malus*, and ILS,  
652 hybridization, and allopolyploidy have played an important role in the evolution of *Malus*, explaining  
653 this cytonuclear discordance. We detected a deep hybridization event involving *Malus doumeri* as a  
654 hybrid between the ancestor of pome-beared species and *Docynia delavayi*, and a recent hybridization

655 event (*M. coronaria*) between *M. sieversii* and a taxon of the clade of *M. ioensis* and *M. angustifolia*.  
656 However, our plastid result recovered the biphyly of *Malus* s.l., with the combined eastern North  
657 American and the Mediterranean clade sister to the East Asian genus *Pourthiaea*. The well-supported  
658 cytonuclear discordance could be best explained by the chloroplast capture event that occurred in  
659 western North America in the Eocene. The phylogenomic case study of the apple genus implicated that  
660 multiple methods accounting for ILS and gene flow can help untangle complex phylogenetic  
661 relationships among species, and concatenation method or methods only accounting for ILS (coalescent-  
662 based method) are biased and not appropriate for phylogenetic inferences in lineages with a highly  
663 complex evolutionary history. Our historical biogeographic analysis without fossil species in northern  
664 East Asia and western North America resulted in the East Asian origin, contrastingly that involving  
665 fossil and living species supported a widespread East Asian-western North American origin of *Malus*  
666 s.l., followed by subsequent extinction events in northern East Asia and western North America in the  
667 Eocene, and this indicated that integrating fossil and living species could promote the more accurate  
668 estimation of dating analysis, as well as ancestral area reconstruction<sup>160</sup>. The robust phylogenomic  
669 framework for the apple genus should provide an evolutionary basis for the breeding and crop  
670 improvement of apples and their close relatives. The study also represents an excellent case for utilizing  
671 the recently proposed deep genome skimming approach for obtaining nuclear and organelle genes for  
672 robust phylogenetic reconstructions.

## 673 **Acknowledgments**

674 All computational analyses were conducted on the Smithsonian Institution High Performance  
675 Computing Cluster (SI/HPC, “Hydra”: <https://doi.org/10.25572/SIHPC>). National Natural Science  
676 Foundation of China supports this research (Grant No.: 32000163 & 31620103902).

677 **Author details**

678 <sup>1</sup>State Key Laboratory of Systematic and Evolutionary Botany, Institute of Botany, Chinese Academy of  
679 Sciences, Beijing 100093, China. <sup>2</sup>Department of Botany, National Museum of Natural History,  
680 Smithsonian Institution, PO Box 37012, Washington, DC 20013-7012, USA. <sup>3</sup>Key Laboratory of Plant  
681 Resources Conservation and Sustainable Utilization, South China Botanical Garden, Chinese Academy  
682 of Sciences, Guangzhou 510650, Guangdong, China. <sup>4</sup>Guangdong Provincial Key Laboratory of Applied  
683 Botany, South China Botanical Garden, Chinese Academy of Sciences, Guangzhou 510650, Guangdong,  
684 China. <sup>5</sup>National Institute of Biological Resources, Incheon 22689, South Korea. <sup>6</sup>School of Ecology  
685 and Nature Conservation, Beijing Forestry University, Beijing, 100083 PR China. <sup>7</sup>Department of Plant  
686 and Microbial Biology, North Carolina State University, Raleigh, NC 27965, USA. <sup>8</sup>State Key  
687 Laboratory of Genetic Engineering and Collaborative Innovation Center of Genetics and Development,  
688 Ministry of Education Key Laboratory of Biodiversity and Ecological Engineering, Institute of Plant  
689 Biology, Center of Evolutionary Biology, School of Life Sciences, Fudan University, Shanghai 200433,  
690 China. <sup>9</sup>Department of Biology, Huck Institutes of the Life Sciences, Pennsylvania State University,  
691 510D Mueller Laboratory, University Park, PA 16802 USA. <sup>10</sup>College of Life Sciences, Liaocheng  
692 University, Liaocheng 252059, China

693 **Author contributions**

694 B.B.L. designed and led the project. D.Y.H. and J.W. supervised the study. B.B.L. carried out the  
695 phylogenomic analyses and wrote the draft manuscript. C.X. performed the experiment of deep genome  
696 skimming. C.R., M.K., R.H., J.H., and W.B.Z. participated in the phylogenetic and biogeographic



697 analyses. G.Z.Q. provided suggestions on structuring the paper. C.H.H. and H.M. provided part of the  
698 transcriptomic data. All the authors contributed to the writing and interpretation of the results, and  
699 approved the final manuscript.

## 700 **Data availability**

701 Raw reads have been deposited in the NCBI Sequence Read Archive (BioProject PRJNA759205). The  
702 customized scripts for SCN gene analysis, tree files, pre-and post-filtered alignments for all analyses are  
703 available from the Dryad Digital Repository: <https://doi.org/10.5061/dryad.2jm63xsq5>.

## 704 **Conflict of interest**

705 The authors declare no competing interests.

## 706 **References**

- 707 1. Kalkman, C. Rosaceae in The Families and Genera of Vascular Plants. Vol. VI. Flowering Plants.  
708 Dicotyledons. Celastrales, Oxalidales, Rosales, Cornales, Ericales Vol. 6 (ed Kubitzki, K.) 343-386  
709 (Springer, 2004).
- 710 2. Lu, L.D. *et al.* Rosaceae in Flora of China. Volume 9: Pittosporaceae through Connaraceae Vol. 9  
711 (eds Wu, Z.Y., Raven, P.H. & Hong, D.Y.) 46-434 (Science Press & Missouri Botanical Garden  
712 Press, 2003).
- 713 3. Phipps, J. Rosaceae in Flora of North America North of Mexico Magnoliophyta: Picramniaceae to  
714 Rosaceae Vol. 9 (eds Flora of North America editorial Committee) 18-662 (Oxford University  
715 Press, 2004).
- 716 4. Kurtto, A.K. Rosaceae (pro parte majore) in Euro+Med Plantbase - the information resource for  
717 Euro-Mediterranean plant diversity (2009).

- 
- 718 5. Robertson, K.R., Phipps, J.B., Rohrer, J.R. & Smith, P.G. A synopsis of genera in Maloideae  
719 (Rosaceae). *Syst. Bot.* **16**, 376-394 (1991).
- 720 6. Koehne, B.A.E. Deutsche dendrologie (Verlag von Ferdinand Enke, 1893).
- 721 7. Beissner, L., Schelle, E. & Zabel, H. Handbuch der Laubholz-Benennung (Verlagsbuchhandlung  
722 Paul Parey, 1903).
- 723 8. Schneider, C.K. Illustriertes Handbuch der Laubholzkunde (Verlag von Gustav Fisher, 1906).
- 724 9. Koidzumi, G. Contributiones ad floram Asiae orientalis. *Acta Phytotax. Geobot.* **3**, 146-162 (1934).
- 725 10. Rehder, A. Manual of cultivated trees and shrubs hardy in North America, exclusive of the  
726 subtropical and warmer temperate regions, ed. 2. (Macmillan, 1940).
- 727 11. Huckins, C.A. A revision of the sections of the genus *Malus* Miller. Ph.D. 796 (Cornell University,  
728 1972).
- 729 12. Phipps, J.B., Robertson, K.R., Smith, P.G. & Rohrer, J.R. A Checklist of the Subfamily Maloideae  
730 (Rosaceae). *Canad. J. Bot.* **68**, 2209-2269 (1990).
- 731 13. Langenfeld, V.T. Apple tree systematics in Apple Tree: Morphological Evolution, Phylogeny,  
732 Geography, and Systematics of the Genus (ed Langenfeld, V.T.) 119-195 (Zinatne, 1991).
- 733 14. Yunong, L. A primarily modern systematics of the genus *Malus* Mill. in the world. *J. Fruit Sci.* S1  
734 (1996).
- 735 15. Qian, G.Z. The taxonomic study of the genus *Malus* Mill. Ph.D. (Nanjing Forestry University,  
736 Nanjing, 2005).
- 737 16. Li, Y.N. A critical review of the species and the taxonomy of *Malus* Mill in the world. *J. Fruit Sci.*  
738 **13**, 63-81 (1996).
- 739 17. Robinson, J.P., Harris, S.A. & Juniper, B.E. Taxonomy of the genus *Malus* Mill. (Rosaceae) with  
740 emphasis on the cultivated apple, *Malus domestica* Borkh. *Pl. Syst. Evol.* **226**, 35-58 (2001).
- 741 18. Lo, E.Y.Y. & Donoghue, M.J. Expanded phylogenetic and dating analyses of the apples and their  
742 relatives (Pyreae, Rosaceae). *Mol. Phylogenet. Evol.* **63**, 230-243 (2012).

- 743 19. Jin, G.H. Phylogenomics and biogeography of *Malus* Mill. in *Kunming Institute of Botany, Chinese*  
744 *Academy of Sciences* Master 129 (University of Chinese Academy of Sciences, Kunming, 2014).
- 745 20. Zhang, S.D. *et al.* Diversification of Rosaceae since the Late Cretaceous based on plastid  
746 phylogenomics. *New Phytol.* **214**, 1355-1367 (2017).
- 747 21. Liu, B.-B., Campbell, C.S., Hong, D.-Y. & Wen, J. Phylogenetic relationships and chloroplast  
748 capture in the *Amelanchier-Malacomeles-Peraphyllum* clade (Maleae, Rosaceae): evidence from  
749 chloroplast genome and nuclear ribosomal DNA data using genome skimming. *Mol. Phylogenet.*  
750 *Evol.* **147**, 106784 (2020).
- 751 22. Xiang, Y.Z. *et al.* Evolution of Rosaceae fruit types based on nuclear phylogeny in the context of  
752 geological times and genome duplication. *Mol. Biol. Evol.* **34**, 262-281 (2017).
- 753 23. Wen, J. *et al.* Transcriptome sequences resolve deep relationships of the grape family. *Plos One* **8**,  
754 e74394 (2013).
- 755 24. L veill -Bourret, E., Starr, J.R., Ford, B.A., Lemmon, E.M. & Lemmon, A.R. Resolving rapid  
756 radiations within angiosperm families using anchored phylogenomics. *Syst. Biol.* **67**, 94-112  
757 (2018).
- 758 25. Herrando-Moraira, S. *et al.* Nuclear and plastid DNA phylogeny of tribe Cardueae (Compositae)  
759 with Hyb-Seq data: A new subtribal classification and a temporal diversification framework. *Mol.*  
760 *Phylogenet. Evol.* **137**, 313-332 (2019).
- 761 26. Feuda, R. *et al.* Improved modeling of compositional heterogeneity supports sponges as sister to all  
762 other animals. *Curr. Biol.* **27**, 3864-3870.e4 (2017).
- 763 27. Walker, J.F., Brown, J.W. & Smith, S.A. Analyzing contentious relationships and outlier genes in  
764 phylogenomics. *Syst. Biol.* **67**, 916-924 (2018).
- 765 28. Smith, S.A., Walker-Hale, N., Walker, J.F. & Brown, J.W. Phylogenetic conflicts, combinability,  
766 and deep phylogenomics in plants. *Syst. Biol.* **69**, 579-592 (2020).

- 767 29. Smith, S.A., Moore, M.J., Brown, J.W. & Yang, Y. Analysis of phylogenomic datasets reveals  
768 conflict, concordance, and gene duplications with examples from animals and plants. *BMC Evol.*  
769 *Biol.* **15**, 150 (2015).
- 770 30. Gonçalves, D.J.P., Simpson, B.B., Ortiz, E.M., Shimizu, G.H. & Jansen, R.K. Incongruence  
771 between gene trees and species trees and phylogenetic signal variation in plastid genes. *Mol.*  
772 *Phylogenet. Evol.* **138**, 219-232 (2019).
- 773 31. Gonçalves, D.J.P., Jansen, R.K., Ruhlman, T.A. & Mandel, J.R. Under the rug: Abandoning  
774 persistent misconceptions that obfuscate organelle evolution. *Mol. Phylogenet. Evol.* **151**, 106903  
775 (2020).
- 776 32. Doyle, J.J. Defining coalescent genes: Theory meets practice in organelle phylogenomics. *Syst.*  
777 *Biol.* (2021).
- 778 33. Walker, J.F., Walker-Hale, N., Vargas, O.M., Larson, D.A. & Stull, G.W. Characterizing gene tree  
779 conflict in plastome-inferred phylogenies. *PeerJ* **7**, e7747 (2019).
- 780 34. Morales-Briones, D.F. *et al.* Disentangling sources of gene tree discordance in phylogenomic data  
781 sets: testing ancient hybridizations in Amaranthaceae s.l. *Syst. Biol.* (2020).
- 782 35. Rose, J.P., Toledo, C.A.P., Lemmon, E.M., Lemmon, A.R. & Sytsma, K.J. Out of sight, out of  
783 mind: widespread nuclear and plastid-nuclear discordance in the flowering plant genus  
784 *Polemonium* (Polemoniaceae) suggests widespread historical gene flow despite limited nuclear  
785 signal. *Syst. Biol.* **70**, 162-180 (2020).
- 786 36. Soltis, D.E., Soltis, P.S., Collier, T.G. & Edgerton, M.L. Chloroplast DNA variation within and  
787 among genera of the *Heuchera* group (Saxifragaceae): evidence for chloroplast transfer and  
788 paraphyly. *Am. J. Bot.* **78**, 1091-1112 (1991).
- 789 37. Yi, T.S., Jin, G.H. & Wen, J. Chloroplast capture and intra- and inter-continental biogeographic  
790 diversification in the Asian - New World disjunct plant genus *Osmorhiza* (Apiaceae). *Mol.*  
791 *Phylogenet. Evol.* (Article) **85**, 10-21 (2015).

- 792 38. Liu, X., Wang, Z.S., Shao, W.H., Ye, Z.Y. & Zhang, J.G. Phylogenetic and taxonomic status  
793 analyses of the Abaso section from multiple nuclear genes and plastid fragments reveal new  
794 insights into the North America origin of *Populus* (Salicaceae). *Front. Plant Sci.* **7**, 2022 (2017).
- 795 39. Chifman, J. & Kubatko, L. Quartet inference from SNP data under the coalescent model.  
796 *Bioinformatics* **30**, 3317-3324 (2014).
- 797 40. Mirarab, S. & Warnow, T. ASTRAL-II: coalescent-based species tree estimation with many  
798 hundreds of taxa and thousands of genes. *Bioinformatics* **31**, i44-i52 (2015).
- 799 41. Pease, J.B., Brown, J.W., Walker, J.F., Hinchliff, C.E. & Smith, S.A. Quartet Sampling  
800 distinguishes lack of support from conflicting support in the green plant tree of life. *Am. J. Bot.*  
801 **105**, 385-403 (2018).
- 802 42. Than, C., Ruths, D. & Nakhleh, L. PhyloNet: a software package for analyzing and reconstructing  
803 reticulate evolutionary relationships. *BMC Bioinform.* **9**, 322 (2008).
- 804 43. Solís-Lemus, C. & Ané, C. Inferring phylogenetic networks with maximum pseudolikelihood under  
805 incomplete lineage sorting. *PLoS Genet.* **12**, e1005896 (2016).
- 806 44. Solís-Lemus, C., Bastide, P. & Ané, C. PhyloNetworks: A Package for phylogenetic networks.  
807 *Mol. Biol. Evol.* **34**, 3292-3298 (2017).
- 808 45. Wolfe, J.A. Some aspects of plant geography of the Northern Hemisphere during the late  
809 Cretaceous and Tertiary. *Ann. Missouri Bot. Gard.* 264-279 (1975).
- 810 46. Wen, J., Ickert-Bond, S., Nie, Z.-L. & Li, R. Timing and modes of evolution of eastern Asian-  
811 North American biogeographic disjunctions in seed plants. 252-269 (2010).
- 812 47. Wolfe, J.A. & Wehr, W. Rosaceous Chamaebatiaria-like foliage from the Paleogene of western  
813 North America. *Aliso: A Journal of Systematic and Evolutionary Botany* **12**, 177-200 (1988).
- 814 48. Manchester, S.R. Fruits and seeds of the Middle Eocene nut beds flora, Clarno Formation, Oregon.  
815 *Palaeontogr. Am.* **58**, 1-205 (1994).
- 816 49. Wehr, W. & Hopkins, D. The Eocene orchards and gardens of Republic, Washington. *Wash. geol.*  
817 **22**, 27-34 (1994).

- 818 50. Axelrod, D.I. The Eocene Thunder Mountain flora of central Idaho (University of California Press,  
819 1998).
- 820 51. Leopold, E. & Clay-Poole, S. Florissant leaf and pollen floras of Colorado compared: climatic  
821 implications in Fossil flora and stratigraphy of the Florissant Formation, Colorado. Proceedings of  
822 the Denver Museum of Nature and Science, series Vol. 4 17-70 (2001).
- 823 52. Wheeler, E.A. & Manchester, S.R. Woods of the middle Eocene nut beds flora, Clarno Formation,  
824 Oregon, USA (Published for the International Association of Wood Anatomists at the Nationaal  
825 Herbarium Nederland, 2002).
- 826 53. Campbell, C.S., Evans, R.C., Morgan, D.R., Dickinson, T.A. & Arsenault, M.P. Phylogeny of  
827 subtribe Pyrinae (formerly the Maloideae, Rosaceae): Limited resolution of a complex evolutionary  
828 history. *Pl. Syst. Evol.* **266**, 119-145 (2007).
- 829 54. Chen, X. *et al.* Sequencing of a wild apple (*Malus baccata*) Genome unravels the differences  
830 between cultivated and wild apple species regarding disease resistance and cold tolerance. *G3*  
831 (*Bethesda*) **9**, 2051-2060 (2019).
- 832 55. Velasco, R. *et al.* The genome of the domesticated apple (*Malus x domestica* Borkh.). *Nat. Genet.*  
833 **42**, 833-9 <http://dx.doi.org/10.1038/ng.654> (2010).
- 834 56. Daccord, N. *et al.* High-quality de novo assembly of the apple genome and methylome dynamics of  
835 early fruit development. *Nat. Genet.* **49**, 1099-1106 (2017).
- 836 57. Duan, N. *et al.* Genome re-sequencing reveals the history of apple and supports a two-stage model  
837 for fruit enlargement. *Nat. Commun.* **8**, (2017).
- 838 58. Zhang, L. *et al.* A high-quality apple genome assembly reveals the association of a retrotransposon  
839 and red fruit colour. *Nat. Commun.* **10**, 1494 (2019).
- 840 59. Sun, X. *et al.* Phased diploid genome assemblies and pan-genomes provide insights into the genetic  
841 history of apple domestication. *Nat. Genet.* **52**, 1423-1432 (2020).

- 842 60. Liu, B.-B. *et al.* Capturing single-copy nuclear genes, organellar genomes, and nuclear ribosomal  
843 DNA from deep genome skimming data for plant phylogenetics: A case study in Vitaceae. *J. Syst.*  
844 *Evol.* (2021).
- 845 61. Maureira-Butler, I.J., Pfeil, B.E., Muangprom, A., Osborn, T.C. & Doyle, J.J. The reticulate history  
846 of *Medicago* (Fabaceae). *Syst. Biol.* **57**, 466-482 (2008).
- 847 62. Liang, G.-L. Observations of chromosomes of *Malus* species in China. *Acta Phytotax. Sin.* **25**, 437-  
848 441 (1987).
- 849 63. Chen, R.Y. Chromosome atlas of Chinese fruit trees and their close wild relatives. *Chromosome*  
850 *atlas of Chinese principal economic plants. Tomus I* (1993).
- 851 64. Liang, G.-L. & Li, X.-L. Chromosome studies of Chinese species of *Malus* Mill. *Acta Phytotax.*  
852 *Sin.* **31**, 236-251 (1993).
- 853 65. Schuster, M. & Büttner, R. Chromosome numbers in the *Malus* wild species collection of the  
854 genebank Dresden-Pillnitz. *Genet. Resour. Crop Evol.* **42**, 353-361  
855 <http://dx.doi.org/10.1007/bf02432139> (1995).
- 856 66. Liang, G.-L., Li, Y.-N. & Li, X.-L. Evolutionary study of the chromosomes at pollen mother cell  
857 meiosis in *Malus*. *J. Southwest Agric. Univ.* **18**, 299-307 (1996).
- 858 67. Liang, G.-L. Comparative studies of karyotypes in Chinese species of *Malus*. *J. Southwest Agric.*  
859 *Univ.* **1**, 104-117 (1986).
- 860 68. Pogan, E., Jankun, A. & Wcislo, H. Further studies in chromosome numbers of Polish angiosperms.  
861 Part XXIV. *Acta Biologica Cracoviensia. Series Botanica* **33**, 26, 29-31, 35, 38 (1991).
- 862 69. Liang, G.-L. A preliminary study on G--banding patterns at metaphase chromosomes in *Malus*  
863 *baccata*. *Hereditas* **12**, 4 (1990).
- 864 70. Baranec, T. & Murin, A. Karyogical analyses of some Korean woody plants. *Biologia* **58**, 797-804  
865 (2003).
- 866 71. Probatova, N.S. *et al.* Chromosome numbers of vascular plants from nature reserves of the  
867 Primorsky Territory and the Amur River basin. *Bot. Zhurn. S.S.S.R.* **91**, 1117-1134 (2006).



- 868 72. Liang, G.-L. Induction of Giemsa C-bands and analyses of banding patterns in *Malus sikkimensis*.  
869 *J. Southwest Agric. Univ.* **19**, 95-97 (1997).
- 870 73. Höfer, M. & Meister, A. Genome size variation in *Malus* species. *J. Bot.* **2010**, 1-8 (2010).
- 871 74. Decaisne, M.J. Mémoire sur la Famille des Pomacées. *Nouvelles archives du Muséum d'histoire*  
872 *naturelle* **10**, 45-192 (1874).
- 873 75. Focke, W.O. Rosaceae in Die Natürlichen Pflanzenfamilien nebst ihren Gattungen und wichtigeren  
874 Arten, insbesondere den Nutzpflanzen, unter Mitwirkung zahlreicher hervorragender Fachgelehrten  
875 begründet T.3 Abt.3 (eds Engler, A., Krause, K., Pilger, R.K.F. & Prantl, K.) (W. Engelmann,  
876 1894).
- 877 76. Rehder, A. Bibliography of cultivated trees and shrubs hardy in the cooler temperate regions of the  
878 northern hemisphere (Jamaica Plain, 1949).
- 879 77. Delectis Florae Reipublicae Popularis Sinicae Agenda Academiae Sinicae Edita Flora Reipublicae  
880 Popularis Sinicae (Science Press, 1974).
- 881 78. WILLIAMS, A.H. Chemical evidence from the flavonoids relevant to the classification of *Malus*  
882 species. *Bot. J. Linn. Soc.* **84**, 31-39 (1982).
- 883 79. Rieseberg, L.H. & Soltis, D. Phylogenetic consequences of cytoplasmic gene flow in plants. *Trends*  
884 *Plant Sci.* **5**, 65-84 (1991).
- 885 80. Acosta, M.C. & Premoli, A.C. Evidence of chloroplast capture in South American *Nothofagus*  
886 (subgenus *Nothofagus*, *Nothofagaceae*). *Mol. Phylogenet. Evol.* **54**, 235-242 (2010).
- 887 81. Wen, J. Evolution of eastern Asian and eastern North American disjunct distributions in flowering  
888 plants. *Annu. Rev. Ecol. Evol. Syst.* **30**, 421-455 (1999).
- 889 82. Liu, B.-B. & Hong, D.-Y. A taxonomic revision of the *Pourthiaea villosa* complex (Rosaceae).  
890 *Phytotaxa* **244**, 201-247 (2016).
- 891 83. Liu, B.-B. & Hong, D.-Y. Identity of *Pourthiaea podocarpifolia* (Rosaceae). *Phytotaxa* **269**, 221-  
892 230 (2016).

- 893 84. Liu, B.-B. & Hong, D.-Y. A taxonomic revision of four complexes in the genus *Pourthiaea*  
894 (Rosaceae) (Magnolia Press, 2017).
- 895 85. Campbell, C.S., Greene, C.W. & Dickinson, T.A. Reproductive biology in subfam. Maloideae  
896 (Rosaceae). *Syst. Bot.* **16**, 333-349 (1991).
- 897 86. Wagner, N.D., He, L. & Hörandl, E. Phylogenomic relationships and evolution of polyploid *Salix*  
898 species revealed by RAD sequencing data. *Front. Plant Sci.* **11**, (2020).
- 899 87. Cheng, M.H., Yang, X.H. & Zeng, W.G. A preliminary report on investigation and study of *Malus*  
900 *xiaojinensis* — an apple stock resource. *J. Southwest Agric. Univ.* **3**, 38-43 (1984).
- 901 88. Shi, S.-Y. *et al.* Genetic diversity of *Malus toringoides* (Rehd.) Hughes based on AFLP. *Acta*  
902 *Hortic. Sin.* **33**, 381 (2006).
- 903 89. Douglas, R.G. & Woodruff, F. Deep sea benthic foraminifera in The Sea The Oceanic Lithosphere  
904 (ed Emiliani, C.) 1233-1327 (Wiley-Interscience, 1981).
- 905 90. Haq, B.U., Hardenbol, J. & Vail, P.R. Chronology of Fluctuating Sea Levels Since the Triassic.  
906 *Science* **235**, 1156-1167 (1987).
- 907 91. Zachos, J., Pagani, M., Sloan, L., Thomas, E. & Billups, K. Trends, rhythms, and aberrations in  
908 global climate 65 Ma to present. *Science* **292**, 686-693 (2001).
- 909 92. Savage, J.M. & Vial, J.L. The geographic distribution of frogs: patterns and predictions (University  
910 of Southern California Press. Allan Hancock Foundation, 1973).
- 911 93. An, Z., Kutzbach, J.E., Prell, W.L. & Porter, S.C. Evolution of Asian monsoons and phased uplift  
912 of the Himalaya–Tibetan plateau since Late Miocene times. *Nature* **411**, 62-66 (2001).
- 913 94. Zhu, W.-D., Nie, Z.-L., Wen, J. & Sun, H. Molecular phylogeny and biogeography of *Astilbe*  
914 (Saxifragaceae) in Asia and eastern North America. *Bot. J. Linn. Soc.* **171**, 377-394 (2013).
- 915 95. Deng, T. *et al.* Does the Arcto-Tertiary biogeographic hypothesis explain the disjunct distribution  
916 of northern hemisphere herbaceous plants? The case of *Meehania* (Lamiaceae). *Plos One* **10**,  
917 e0117171 (2015).

- 918 96. Huang, W.-P. *et al.* Molecular phylogenetics and biogeography of the eastern Asian-eastern North  
919 American disjunct *Mitchella* and its close relative *Damnacanthus* (Rubiaceae, Mitchelleae). *Bot. J.*  
920 *Linn. Soc.* **171**, 395-412 (2013).
- 921 97. Nie, Z.L. *et al.* Molecular phylogeny and biogeographic diversification of *Parthenocissus*  
922 (Vitaceae) disjunct between Asia and North America. *Am. J. Bot.* **97**, 1342-53 (2010).
- 923 98. Ma, Z.-Y. *et al.* Phylogenomics, biogeography, and adaptive radiation of grapes. *Mol. Phylogenet.*  
924 *Evol.* **129**, 258-267 (2018).
- 925 99. Leopold, E.B. & MacGinitie, H.D. Development and affinities of Tertiary floras in the Rocky  
926 Mountains. *Floristics and Paleoflorists of Asia and Eastern North America* (1972).
- 927 100. Wing, S.L. Tertiary vegetation of North America as a context for mammalian evolution in  
928 Evolution of Tertiary Mammals of North America, Volume 1: Terrestrial Carnivores, Ungulates,  
929 and Ungulatelike Mammals (eds Janis, C.M., Scott, K.N. & Jacobs, L.L.) 37-60 (Cambridge  
930 University, 1998).
- 931 101. Graham, A. The role of land bridges, ancient environments, and migrations in the assembly of the  
932 North American flora. *J. Syst. Evol.* **56**, 405-429 (2018).
- 933 102. He, H. *et al.* New <sup>40</sup>Ar/<sup>39</sup>Ar dating results from the Shanwang Basin, eastern China: Constraints  
934 on the age of the Shanwang Formation and associated biota. *Phys. Earth Planet. Inter.* **187**, 66-75  
935 (2011).
- 936 103. Liu, B.-B., Liu, G.-N., Hong, D.-Y. & Wen, J. *Eriobotrya* belongs to *Rhaphiolepis* (Maleae,  
937 Rosaceae): evidence from chloroplast genome and nuclear ribosomal DNA data. *Front. Plant Sci.*  
938 **10**, 1731 (2020).
- 939 104. Li, J., Wang, S., Yu, J., Wang, L. & Zhou, S. A modified CTAB protocol for plant DNA extraction.  
940 *Chinese Bulletin of Botany* **48**, 72 (2013).
- 941 105. Chamala, S. *et al.* MarkerMiner 1.0: A new application for phylogenetic marker development using  
942 angiosperm transcriptomes. *Appl. Plant Sci.* **3**, 1400115 (2015).

- 943 106. Altschul, S.F., Gish, W., Miller, W., Myers, E.W. & Lipman, D.J. Basic Local Alignment Search  
944 Tool. *J. Mol. Biol.* **215**, 403-410 (1990).
- 945 107. Altschul, S.F. *et al.* Gapped BLAST and PSI-BLAST: a new generation of protein database search  
946 programs. *Nucleic Acids Res.* **25**, 3389-3402 (1997).
- 947 108. Camacho, C. *et al.* BLAST+: architecture and applications. *BMC Bioinform.* **10**, 421 (2009).
- 948 109. Kears, M. *et al.* Geneious Basic: an integrated and extendable desktop software platform for the  
949 organization and analysis of sequence data. *Bioinformatics* **28**, 1647-1649 (2012).
- 950 110. Morgulis, A. *et al.* Database indexing for production MegaBLAST searches. *Bioinformatics* **24**,  
951 1757-1764 (2008).
- 952 111. Bolger, A.M., Lohse, M. & Usadel, B. Trimmomatic: a flexible trimmer for Illumina sequence  
953 data. *Bioinformatics* **30**, 2114-2120 (2014).
- 954 112. Andrews, S. FastQC: A quality control tool for high throughput sequence data. accessed August 1,  
955 2021 (2018).
- 956 113. Johnson, M.G. *et al.* HybPiper: Extracting coding sequence and introns for phylogenetics from  
957 high - throughput sequencing reads using target enrichment. *Appl. Plant Sci.* **4**, 1600016  
958 <http://dx.doi.org/10.3732/apps.1600016> (2016).
- 959 114. Li, H. & Durbin, R. Fast and accurate short read alignment with Burrows-Wheeler transform.  
960 *Bioinformatics* **25**, 1754-1760 (2009).
- 961 115. Bankevich, A. *et al.* SPAdes: a new genome assembly algorithm and its applications to single-cell  
962 sequencing. *J. Comput. Biol.* **19**, 455-477 (2012).
- 963 116. Slater, G.S.C. & Birney, E. Automated generation of heuristics for biological sequence comparison.  
964 *BMC Bioinform.* **6**, 31 (2005).
- 965 117. Nakamura, T., Yamada, K.D., Tomii, K. & Katoh, K. Parallelization of MAFFT for large-scale  
966 multiple sequence alignments. *Bioinformatics* **34**, 2490-2492 (2018).
- 967 118. Capella-Gutiérrez, S., Silla-Martínez, J.M. & Gabaldón, T. trimAl: a tool for automated alignment  
968 trimming in large-scale phylogenetic analyses. *Bioinformatics* **25**, 1972-1973 (2009).

- 969 119. Borowiec, M.L. Spruceup: fast and flexible identification, visualization, and removal of outliers  
970 from large multiple sequence alignments. *J. Open Source Softw.* **4**, 1635 (2019).
- 971 120. Borowiec, M.L. AMAS: a fast tool for alignment manipulation and computing of summary  
972 statistics. *PeerJ* **4**, e1660 (2016).
- 973 121. Stamatakis, A. RAxML version 8: a tool for phylogenetic analysis and post-analysis of large  
974 phylogenies. *Bioinformatics* **30**, 1312-1313 (2014).
- 975 122. Mai, U. & Mirarab, S. TreeShrink: fast and accurate detection of outlier long branches in  
976 collections of phylogenetic trees. *BMC Genom.* **19**, (2018).
- 977 123. Stamatakis, A. RAxML-VI-HPC: Maximum likelihood-based phylogenetic analyses with  
978 thousands of taxa and mixed models. *Bioinformatics* **22**, 2688-2690 (2006).
- 979 124. Lanfear, R., Frandsen, P.B., Wright, A.M., Senfeld, T. & Calcott, B. PartitionFinder 2: new  
980 methods for selecting partitioned models of evolution for molecular and morphological  
981 phylogenetic analyses. *Mol. Biol. Evol.* **34**, 772-773 (2016).
- 982 125. Lanfear, R., Calcott, B., Kainer, D., Mayer, C. & Stamatakis, A. Selecting optimal partitioning  
983 schemes for phylogenomic datasets. *BMC Evol. Biol.* **14**, 82 (2014).
- 984 126. Minh, B.Q. *et al.* IQ-TREE 2: New models and efficient methods for phylogenetic inference in the  
985 genomic era. *Mol. Biol. Evol.* **37**, 1530-1534 (2020).
- 986 127. Sayyari, E. & Mirarab, S. Fast Coalescent-Based Computation of Local Branch Support from  
987 Quartet Frequencies. *Mol. Biol. Evol.* **33**, 1654-1668 (2016).
- 988 128. Junier, T. & Zdobnov, E.M. The Newick utilities: high-throughput phylogenetic tree processing in  
989 the UNIX shell. *Bioinformatics* **26**, 1669-1670 (2010).
- 990 129. Brown, J.W., Walker, J.F. & Smith, S.A. Phyx: phylogenetic tools for unix. *Bioinformatics* **33**,  
991 1886-1888 (2017).
- 992 130. Zhang, C., Rabiee, M., Sayyari, E. & Mirarab, S. ASTRAL-III: polynomial time species tree  
993 reconstruction from partially resolved gene trees. *BMC Bioinform.* **19**, 153 (2018).

- 994 131. Salichos, L., Stamatakis, A. & Rokas, A. Novel information theory-based measures for quantifying  
995 incongruence among phylogenetic trees. *Mol. Biol. Evol.* **31**, 1261-1271 (2014).
- 996 132. G. J. Hodel, R., Zimmer, E. & Wen, J. A phylogenomic approach resolves the backbone of *Prunus*  
997 (Rosaceae) and identifies signals of hybridization and allopolyploidy. *Mol. Phylogenet. Evol.*  
998 107118 (2021).
- 999 133. Wang, K. *et al.* Incomplete lineage sorting rather than hybridization explains the inconsistent  
1000 phylogeny of the wisent. *Commun. Biol.* **1**, 169 (2018).
- 1001 134. Yang, Y. *et al.* Prickly waterlily and rigid hornwort genomes shed light on early angiosperm  
1002 evolution. *Nat. Plants* **6**, 215-222 (2020).
- 1003 135. He, J. *et al.* A phylotranscriptome study using silica gel-dried leaf tissues produces an updated  
1004 robust phylogeny of Ranunculaceae. (Cold Spring Harbor Laboratory, 2021).
- 1005 136. Liu, L. & Yu, L. Phybase: an R package for species tree analysis. *Bioinformatics* **26**, 962-963  
1006 (2010).
- 1007 137. Blischak, P.D., Chifman, J., Wolfe, A.D. & Kubatko, L.S. HyDe: a Python package for genome-  
1008 scale hybridization detection. *Syst. Biol.* **67**, 821-829 (2018).
- 1009 138. Huson, D.H. *et al.* Dendroscope: An interactive viewer for large phylogenetic trees. *BMC*  
1010 *Bioinform.* **8**, 460 <http://dx.doi.org/10.1186/1471-2105-8-460> (2007).
- 1011 139. Dierckxsens, N., Mardulyn, P. & Smits, G. NOVOPlasty: de novo assembly of organelle genomes  
1012 from whole genome data. *Nucleic Acids Res.* **45**, e18-e18 (2016).
- 1013 140. Zhang, N., Wen, J. & Zimmer, E.A. Congruent deep relationships in the grape family (Vitaceae)  
1014 based on sequences of chloroplast genomes and mitochondrial genes via genome skimming. *Plos*  
1015 *One* **10**, e0144701 (2015).
- 1016 141. Langmead, B. & Salzberg, S.L. Fast gapped-read alignment with Bowtie 2. *Nat. Methods* **9**, 357  
1017 (2012).

- 1018 142. Liu, B.-B. *et al.* Phylogenomic analyses of the *Photinia* complex support the recognition of a new  
1019 genus *Phippsiomeles* and the resurrection of a redefined *Stranvaesia* in Maleae (Rosaceae). *J. Syst.*  
1020 *Evol.* **57**, 678-694 (2019).
- 1021 143. Wang, Y.-B. *et al.* Major clades and a revised classification of *Magnolia* and Magnoliaceae based  
1022 on whole plastid genome sequences via genome skimming. *J. Syst. Evol.* **58**, 673-695 (2020).
- 1023 144. Qu, X.-J., Moore, M.J., Li, D.-Z. & Yi, T.-S. PGA: a software package for rapid, accurate, and  
1024 flexible batch annotation of plastomes. *Plant Methods* **15**, 50 (2019).
- 1025 145. Lehwark, P. & Greiner, S. GB2sequin-A file converter preparing custom GenBank files for  
1026 database submission. *Genomics* **111**, 759-761 (2019).
- 1027 146. MacGinitie, H.D. The Eocene Green River flora of northwestern Colorado and northeastern Utah  
1028 (University of California Press, 1969).
- 1029 147. Drummond, A.J., Ho, S.Y.W., Phillips, M.J. & Rambaut, A. Relaxed phylogenetics and dating with  
1030 confidence. *PLoS Biol.* **4**, (2006).
- 1031 148. Stadler, T. Sampling-through-time in birth–death trees. *J. Theor. Biol.* **267**, 396-404 (2010).
- 1032 149. Heath, T.A., Huelsenbeck, J.P. & Stadler, T. The fossilized birth-death process for coherent  
1033 calibration of divergence-time estimates. *Proceedings of the National Academy of Sciences* **111**,  
1034 E2957-E2966 (2014).
- 1035 150. Rambaut, A., Drummond, A.J., Xie, D., Baele, G. & Suchard, M.A. Posterior summarization in  
1036 Bayesian phylogenetics using Tracer 1.7. *Syst. Biol.* **67**, 901-904 (2018).
- 1037 151. Matzke, N.J. BioGeoBEARS: BioGeography with Bayesian (and likelihood) Evolutionary Analysis  
1038 with R Scripts. version 1.1.1. November 6, 2018 (GitHub, 2018).
- 1039 152. Yu, Y., Harris, A.J., Blair, C. & He, X. RASP (Reconstruct Ancestral State in Phylogenies): a tool  
1040 for historical biogeography. *Mol. Phylogenet. Evol.* **87**, 46-49 (2015).
- 1041 153. Guo, Z.T. *et al.* A major reorganization of Asian climate by the early Miocene. *Clim. Past* **4**, 153-  
1042 174 (2008).



- 1043 154. Donoghue, M.J., Bell, C.D. & Li, J. Phylogenetic Patterns in Northern Hemisphere Plant  
1044 Geography. *Int. J. Plant Sci.* **162**, S41-S52 (2001).
- 1045 155. Manos, P.S. & Stanford, A.M. The historical biogeography of Fagaceae: Tracking the tertiary  
1046 history of temperate and subtropical forests of the Northern Hemisphere. *Int. J. Plant Sci.* **162**, S77-  
1047 S93 (2001).
- 1048 156. Xiang, Q.Y. & Soltis, D.E. Dispersal-Vicariance Analyses of Intercontinental Disjuncts: Historical  
1049 Biogeographical Implications for Angiosperms in the Northern Hemisphere. *Int. J. Plant Sci.* **162**,  
1050 S29-S39 (2001).
- 1051 157. Milne, R.I. & Abbott, R.J. The origin and evolution of Tertiary relict floras. *Adv. Bot. Res.* **38**, 281-  
1052 314 (2002).
- 1053 158. Milne, R.I. Northern Hemisphere plant disjunctions: a window on tertiary land bridges and climate  
1054 change? *Ann. Bot.* **98**, 465-472 (2006).
- 1055 159. Wang, J.J. *et al.* The Biogeographic South-North Divide of Polygonatum (Asparagaceae Tribe  
1056 Polygonateae) within Eastern Asia and Its Recent Dispersals in the Northern Hemisphere. *Plos One*  
1057 **11**, e0166134 (2016).
- 1058 160. Zhou, W.B., Xiang, Q.Y. & Wen, J. Phylogenomics, biogeography, and evolution of morphology  
1059 and ecological niche of the eastern Asian-eastern North American *Nyssa* (Nyssaceae). *J. Syst. Evol.*  
1060 **58**, 571-603 (2020).
- 1061  
1062

1064 Table 1. The result of *phyckle* analysis of detecting the gene dataset supporting each bipartition for *Malus coronaria* and *M.*  
 1065 *sikkimensis*. The result was estimated from the 50%-sample dataset.

| conflict                        | Bipartition                                                                                                                                                                                                                                                                         | number<br>of genes | sum lnL<br>difference | number<br>non-<br>outlier<br>genes | sum lnL<br>difference:<br>outlier genes<br>removed |
|---------------------------------|-------------------------------------------------------------------------------------------------------------------------------------------------------------------------------------------------------------------------------------------------------------------------------------|--------------------|-----------------------|------------------------------------|----------------------------------------------------|
| <i>M.</i><br><i>coronaria</i>   | <i>M. coronaria</i> bipartition A: ( <i>M. coronaria</i> ,( <i>M. angustifolia</i> , <i>M. ioensis</i> ))(all other taxa)                                                                                                                                                           | 445                | 17028.36              | 427                                | 14731.52                                           |
|                                 | <i>M. coronaria</i> bipartition B: ( <i>M. coronaria</i> , <i>M. sieversii</i> )(all other taxa)                                                                                                                                                                                    | 155                | 4126.411              | 153                                | 3876.897                                           |
| <i>M.</i><br><i>sikkimensis</i> | <i>M. sikkimensis</i> bipartition A: ( <i>M. sikkimensis</i> ,( <i>M. baccata</i> var. <i>xiaojinensis</i> , <i>M. orientalis</i> , <i>M. sylvestris</i> , <i>M. sieversii</i> , <i>M. hupehensis</i> , <i>M. toringo</i> , <i>M. baccata</i> , <i>M. rockii</i> ))(all other taxa) | 191                | 3987.746              | 188                                | 3647.953                                           |
|                                 | <i>M. sikkimensis</i> bipartition B: ( <i>M. sikkimensis</i> ,( <i>M. fusca</i> , <i>M. kansuensis</i> ))(all other taxa)                                                                                                                                                           | 409                | 11675.01              | 393                                | 9168.462                                           |

1066 sum lnL difference: the sum of log-likelihood difference; outlier genes indicate the genes for their log-likelihood more than 100.

1067

1068

1069

1070

1071

1072

1073

1074 Table 2. The sporophytic chromosome count number of *Malus* sampled in this study, along with their citations. These 18 species were  
 1075 grouped by Phipps et al. (1991)'s taxonomic system and the clades identified in this study.

| clades identified in this study       | section sensu Phipps et al. (1990)    | species                                    | Sporophytic chromosome count            |
|---------------------------------------|---------------------------------------|--------------------------------------------|-----------------------------------------|
| clade I                               | <i>Malus</i> sect. <i>Sorbomalus</i>  | <i>M. toringo</i>                          | <b>34, 51</b> <sup>62-66</sup>          |
|                                       |                                       | <i>M. sieversii</i>                        | <b>34</b> <sup>62-65,67</sup>           |
|                                       |                                       | <i>M. sylvestris</i>                       | <b>34</b> <sup>63,65,68</sup>           |
|                                       |                                       | <i>M. orientalis</i>                       | -                                       |
|                                       |                                       | <i>M. baccata</i>                          | <b>34</b> <sup>62-64,66,67,69-71</sup>  |
|                                       | <i>Malus</i> sect. <i>Malus</i>       | <i>M. rockii</i>                           | <b>34, 51</b> <sup>62-64,67</sup>       |
|                                       |                                       | <i>M. hupehensis</i>                       | <b>34, 51, 68</b> <sup>62-67</sup>      |
|                                       |                                       | <i>M. baccata</i> var. <i>xiaojinensis</i> | <b>68</b> <sup>63,64</sup>              |
|                                       |                                       | <i>M. sikkimensis</i>                      | <b>34, 68</b> <sup>62-64,66,67,72</sup> |
|                                       |                                       | <i>M. fusca</i>                            | <b>34</b> <sup>3,65</sup>               |
| clade II                              | <i>Malus</i> sect. <i>Sorbomalus</i>  | <i>M. kansuensis</i>                       | <b>34</b> <sup>62,63,65,66</sup>        |
|                                       |                                       | <i>M. angustifolia</i>                     | <b>34, 68</b> <sup>3</sup>              |
|                                       | <i>Malus</i> sect. <i>Chloromeles</i> | <i>M. coronaria</i>                        | <b>34, 51, 68</b> <sup>3,65</sup>       |
|                                       |                                       | <i>M. ioensis</i>                          | <b>34, 51, 68</b> <sup>3,65</sup>       |
|                                       | clade III                             | <i>Malus</i> sect. <i>Sorbomalus</i>       | <i>M. florentina</i>                    |
| <i>Malus</i> sect. <i>Eriolobus</i>   |                                       | <i>M. trilobata</i>                        | <b>34</b> <sup>65,73</sup>              |
| <i>Malus</i> sect. <i>Docyniopsis</i> |                                       | <i>M. doumeri</i>                          | <b>34</b> <sup>63,64</sup>              |
|                                       | <i>Docynia</i>                        | <i>D. delavayi</i>                         | -                                       |

1076 Table 3. Fossil records of *Malus*.

| Age                       | Fossil                                                                       | fossil organ | geographic origin                                                                                          | reference                         |
|---------------------------|------------------------------------------------------------------------------|--------------|------------------------------------------------------------------------------------------------------------|-----------------------------------|
| Eocene (47.8-41.2 Mya)    | <i>Malus collardii</i> Axelrod                                               | leaves       | North America (Thunder Mountain, Idaho, USA)                                                               | Axelrod, 1998                     |
| Eocene (47.8-41.2 Mya)    | <i>Malus kingiensis</i> Budants                                              | leaves       | Eurasia (Rebro Cape, western Kamchatka peninsula, Kamchatka Territory, Russian Federation)                 | Budantsev, 2006                   |
| Eocene (37.71-33.9 Mya)   | <i>Malus florissantensis</i> (Cockerell) MacGinitie                          | leaves       | North America (Green River Formation, Florissant, Colorado, USA)                                           | Cockerell, 1908; MacGinitie, 1953 |
| Eocene (37.71-33.9 Mya)   | <i>Malus pseudocredneria</i> (Cockerell) MacGinitie                          | leaves       | North America (Green River Formation, Florissant, Colorado, USA)                                           | Cockerell, 1908; MacGinitie, 1969 |
| Miocene (23.03-14.18 Mya) | <i>Malus idahoensis</i> R.W.Br.                                              | leaves       | North America (G. W. Oliver coal mine, Salmon, Idaho, USA)                                                 | Brown, 1935                       |
| Miocene (17 Mya)*         | <i>Malus parahupehensis</i> J.Hsu & R.W.Chaney                               | leaves       | NE China (Shanwang, Shandong, China)                                                                       | Hsu & Chaney, 1940                |
| Pliocene (5.33-2.58 Mya)  | <i>Malus obensis</i> M.G.Gorbunov                                            | fruits       | Eurasia (W Siberia)                                                                                        | Gorbunov, 1959                    |
| Pliocene (5.33-2.58 Mya)  | <i>Malus antiqua</i> Doweld = <i>Malus pulcherrima</i> Givulescu nom. illeg. | leaves       | Europe (Chiuzbaia, Județul Maramureș, Romania)                                                             | Doweld (2018)                     |
| Pleistocene (3.2-2.5 Mya) | <i>Malus pseudoangustifolia</i> E.W.Berry                                    | leaves       | North America (right bank of Neuse River 4,5 miles above Seven Springs, Wayne County, North Carolina, USA) | Berry, 1926                       |

1077 \* The timing of the sedimentary sequence of the Shanwang Formation was estimated from  $^{40}\text{Ar}/^{39}\text{Ar}$  analysis of the basalts<sup>102</sup>.

1078

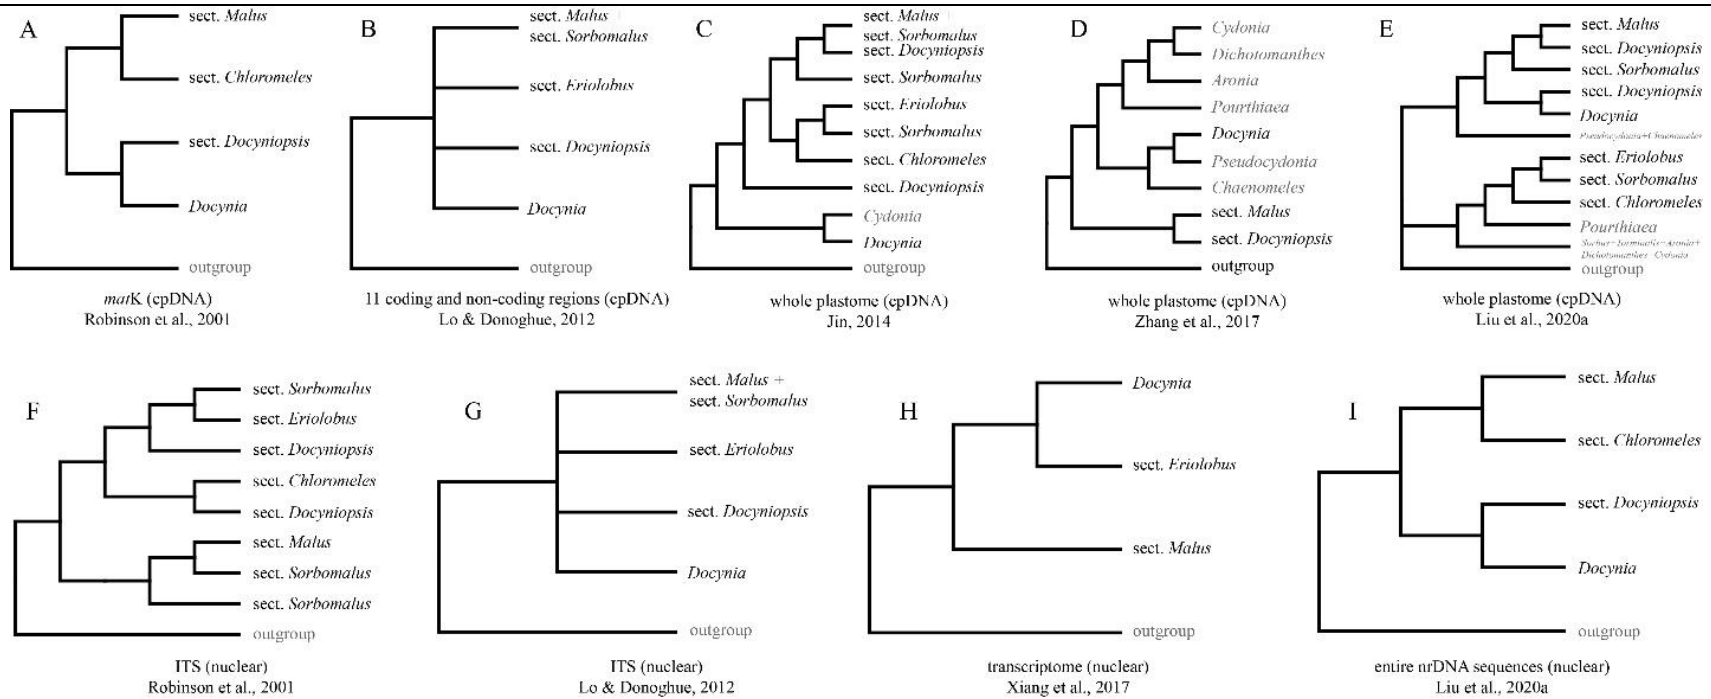

**Fig. 1.** Phylogenetic hypotheses among sections of *Malus* s.l. estimated by previous studies. **a**, plastid *matK* sequence<sup>17</sup>; **b**, 11 plastid coding and non-coding regions<sup>18</sup>; **c**, whole plastome<sup>19</sup>; **d**, whole plastome<sup>20</sup>; **e**, whole plastome<sup>21</sup>; **f**, nuclear ITS sequence<sup>17</sup>; **g**, nuclear ITS sequence<sup>18</sup>; **h**, transcriptome<sup>22</sup>; **i**, entire nrDNA sequences<sup>21</sup>. The sectional delimitation in *Malus* s.l. followed Phipps et al. (1990).

1079

1080

1081

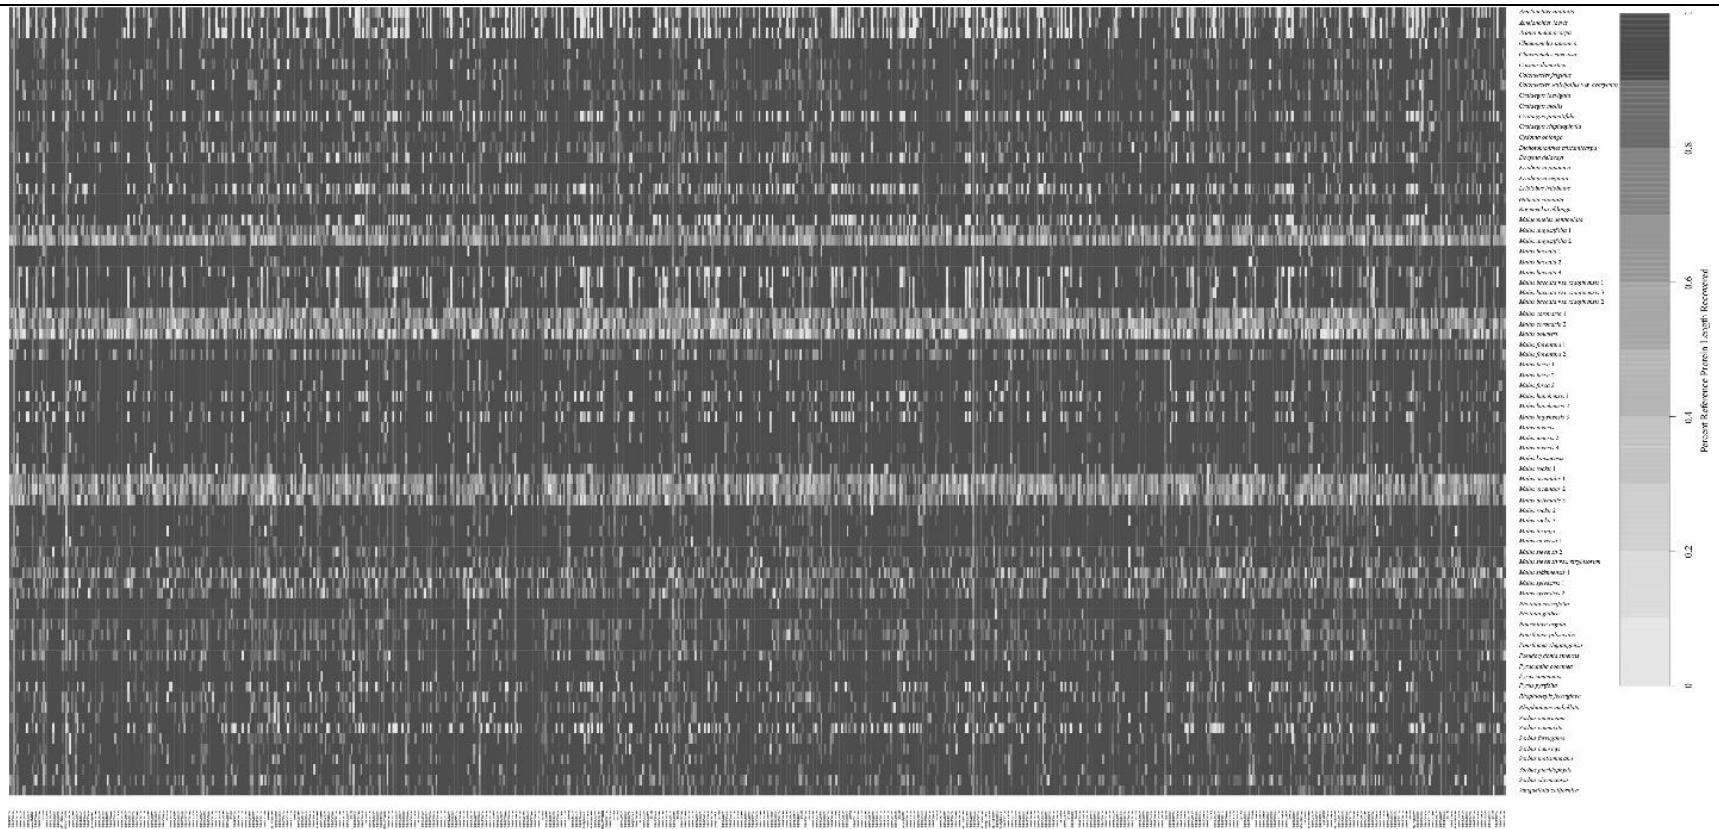

**Fig. 2.** Heat map showing recovery efficiency for 797 genes recovered by HybPiper. Each column is a gene, and each row is one sample. The shade of gray in the cell is determined by the length of sequence recovered by the pipeline, divided by the length of the reference gene (maximum of 1.0).

1083

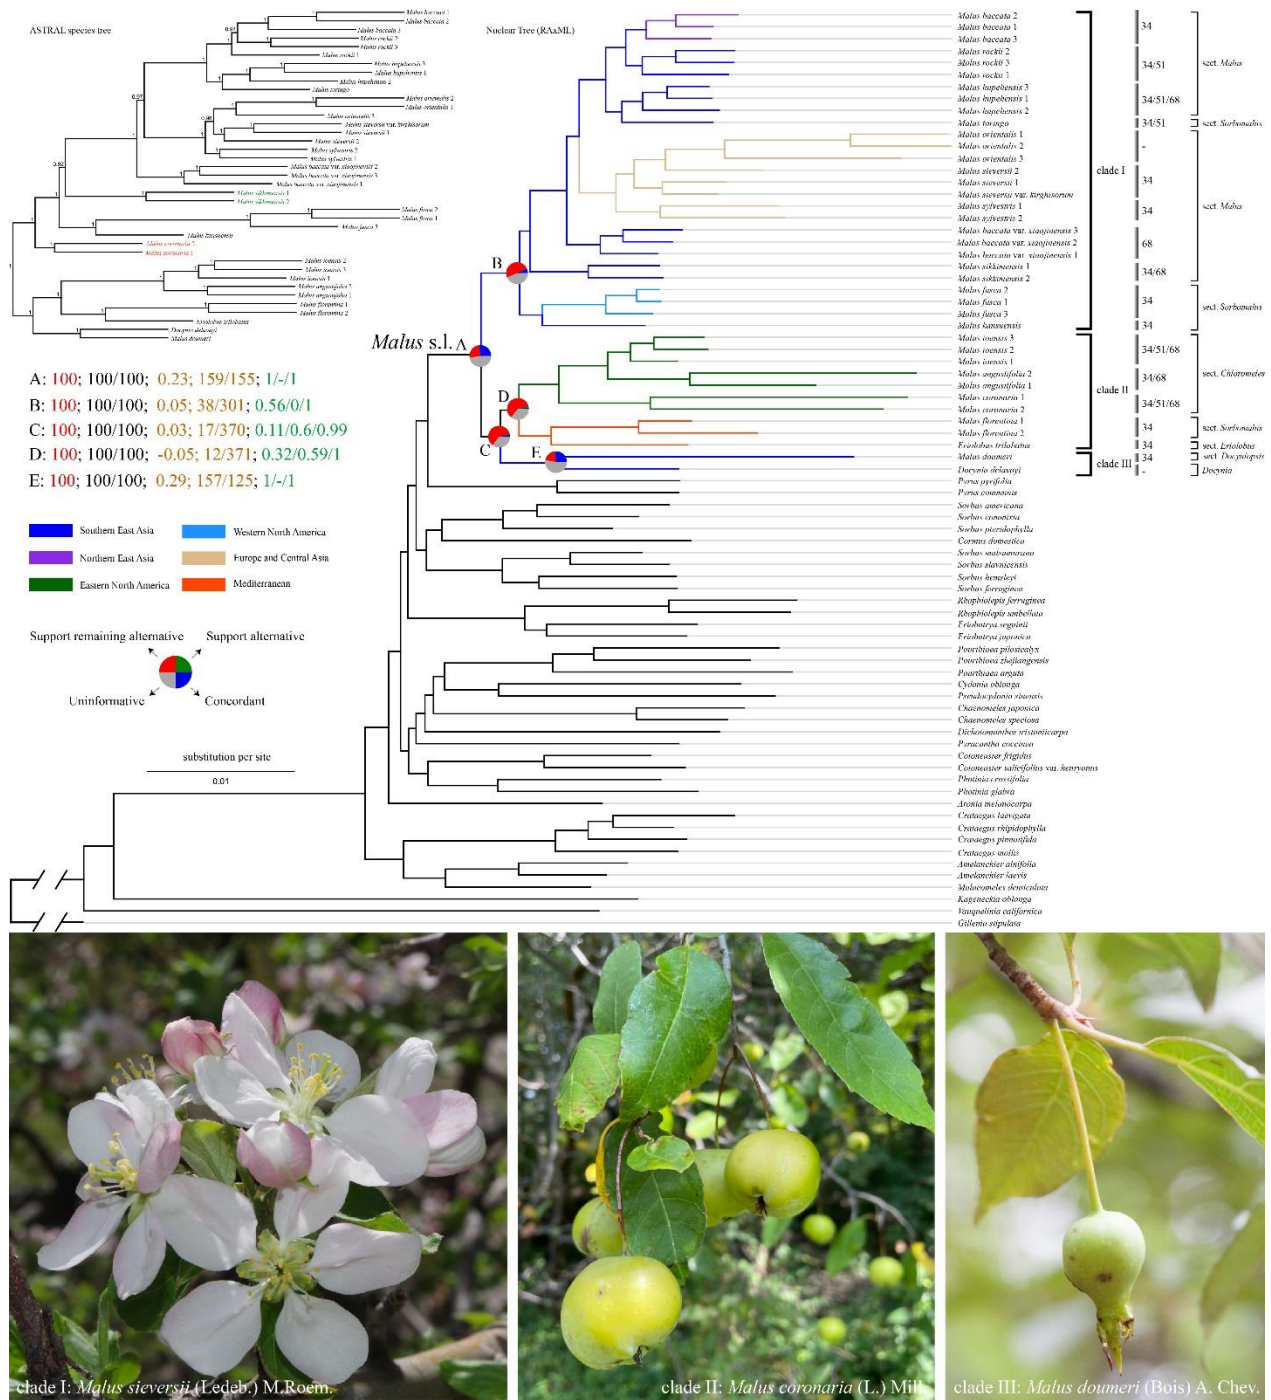

**Fig. 3.** Maximum likelihood phylogeny of *Malus* s.l. in the framework of Maleae inferred from RAxML analysis of the concatenated 80%-sample dataset. Pie charts on the focused five nodes (A, B, C, D, and E) present the proportion of gene trees that support that clade (blue), the proportion that support the main alternative bifurcation (green), the proportion that



support the remaining alternatives (red), and the proportion (conflict or support) that have < 50% bootstrap support (gray). All the other pie charts refer to Fig. S11 available from Dryad. The numbers (top left) indicate values associated with those nodes; they are bootstrap support values estimated from RAxML analysis (e.g., A: 100 labeled by red; see Fig. S4 available on Dryad for all nodes BS), the SH-aLRT support and Ultrafast Bootstrap (UFBoot) support estimated from IQ-TREE2 (e.g., A: 100/100 labeled by black; see Fig. S5 available on Dryad for all nodes support), the Internode Certainty All (ICA) score, the number of gene trees concordant/conflicting with that node in the species tree estimated from *phyparts* (e.g., 0.23; 159/155 labeled by orange; see Fig. S11 available on Dryad for all values), and Quartet Concordance/Quartet Differential/Quartet Informativeness estimated from Quartet Sampling analysis (e.g., 1/-/1 labeled by green; see Fig. S10 available on Dryad for all scores). Branches are colored by their distribution, i.e., dark blue, Southern East Asia; purple, Northern East Asia; green, Eastern North America; light blue, Western North America; yellowish-brown, Europe and Central Asia; red, the Mediterranean. The sporophytic chromosome number is displayed to the right of each species label (see Table 2 for details). The Photo credits: clade I (*Malus sieversii*): Pan Li; clade II (*M. coronaria*): Richard G.J. Hodel; clade III (*M. doumeri*): Bin-Bin Liu.

1084

1085

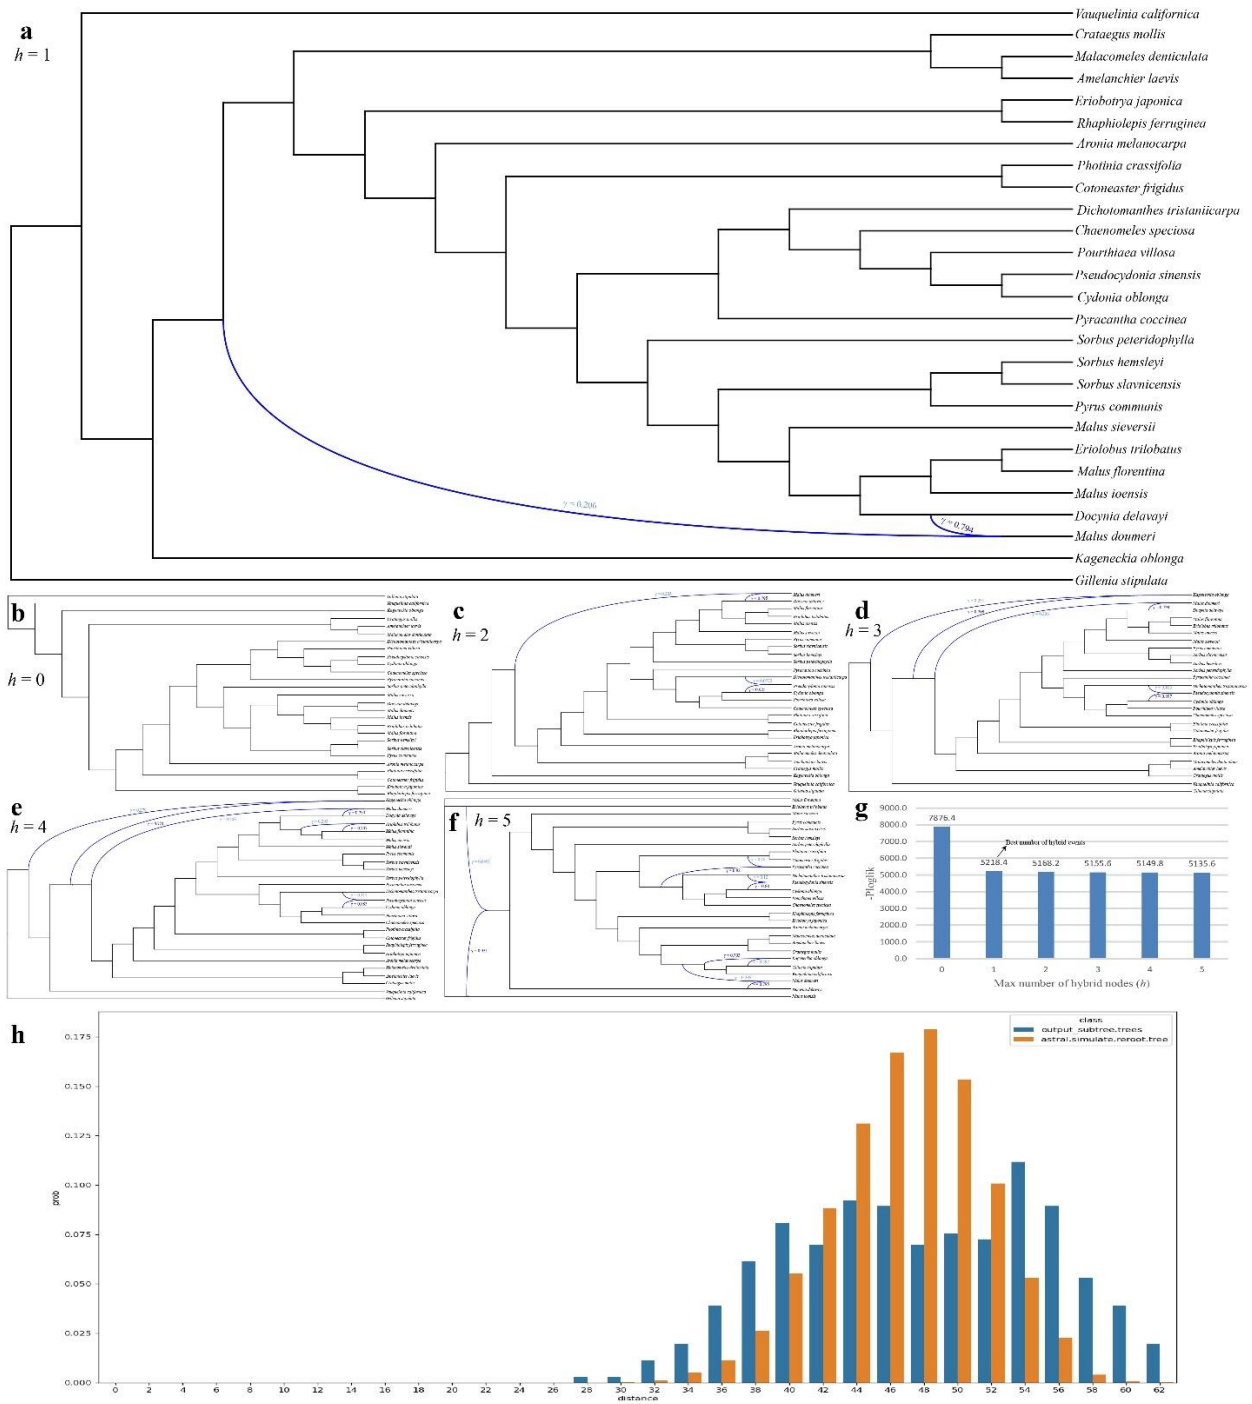

**Fig. 4.** Coalescent simulation and phylogenetic network analysis from the 27-taxa sampling at the tribe level of Maleae. **a-f**, Species networks inferred from SNaQ network analysis with 1 to 5 maximum number of reticulations. **g**, The pseudo-loglikelihood scores (-ploglik) in a bar chart indicated that  $h_{max} = 1$  was the optimal network (A). **h**, Distribution of tree-to-tree distances between empirical gene trees and the ASTRAL species tree, compared to those from the coalescent simulation. Blue curved branches indicate the possible hybridization event. Dark blue and light blue numbers indicate the major and minor inheritance probabilities of hybrid nodes.

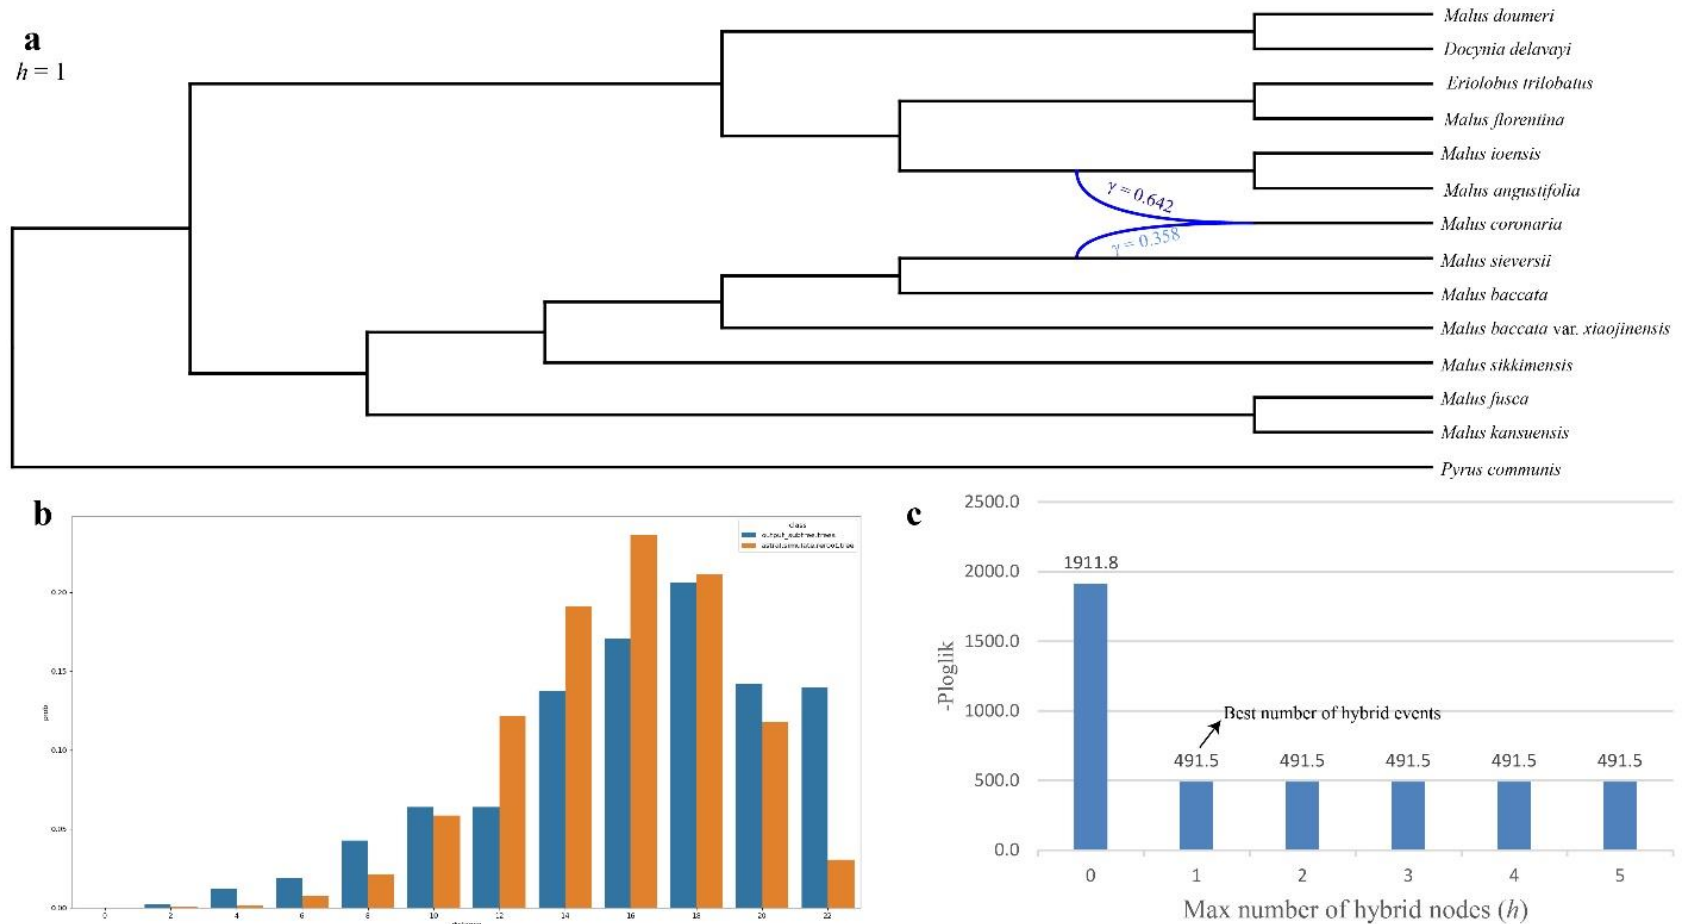

**Fig. 5.** Coalescent simulation and phylogenetic network analysis from the 14-taxa sampling at the genus level of *Malus*. **a**, Species networks inferred from SNaQ network analysis with  $h_{max} = 1$  as the optimal network. **b**, Distribution of tree-to-tree distances between empirical gene trees and the ASTRAL species tree, compared to those from the coalescent simulation. **c**, The pseudo-loglikelihood scores (-ploglik) of one to five maximum number of reticulations. Blue curved branches indicate the possible hybridization event. Dark blue and light blue numbers indicate the major and minor inheritance probabilities of hybrid nodes.

1089

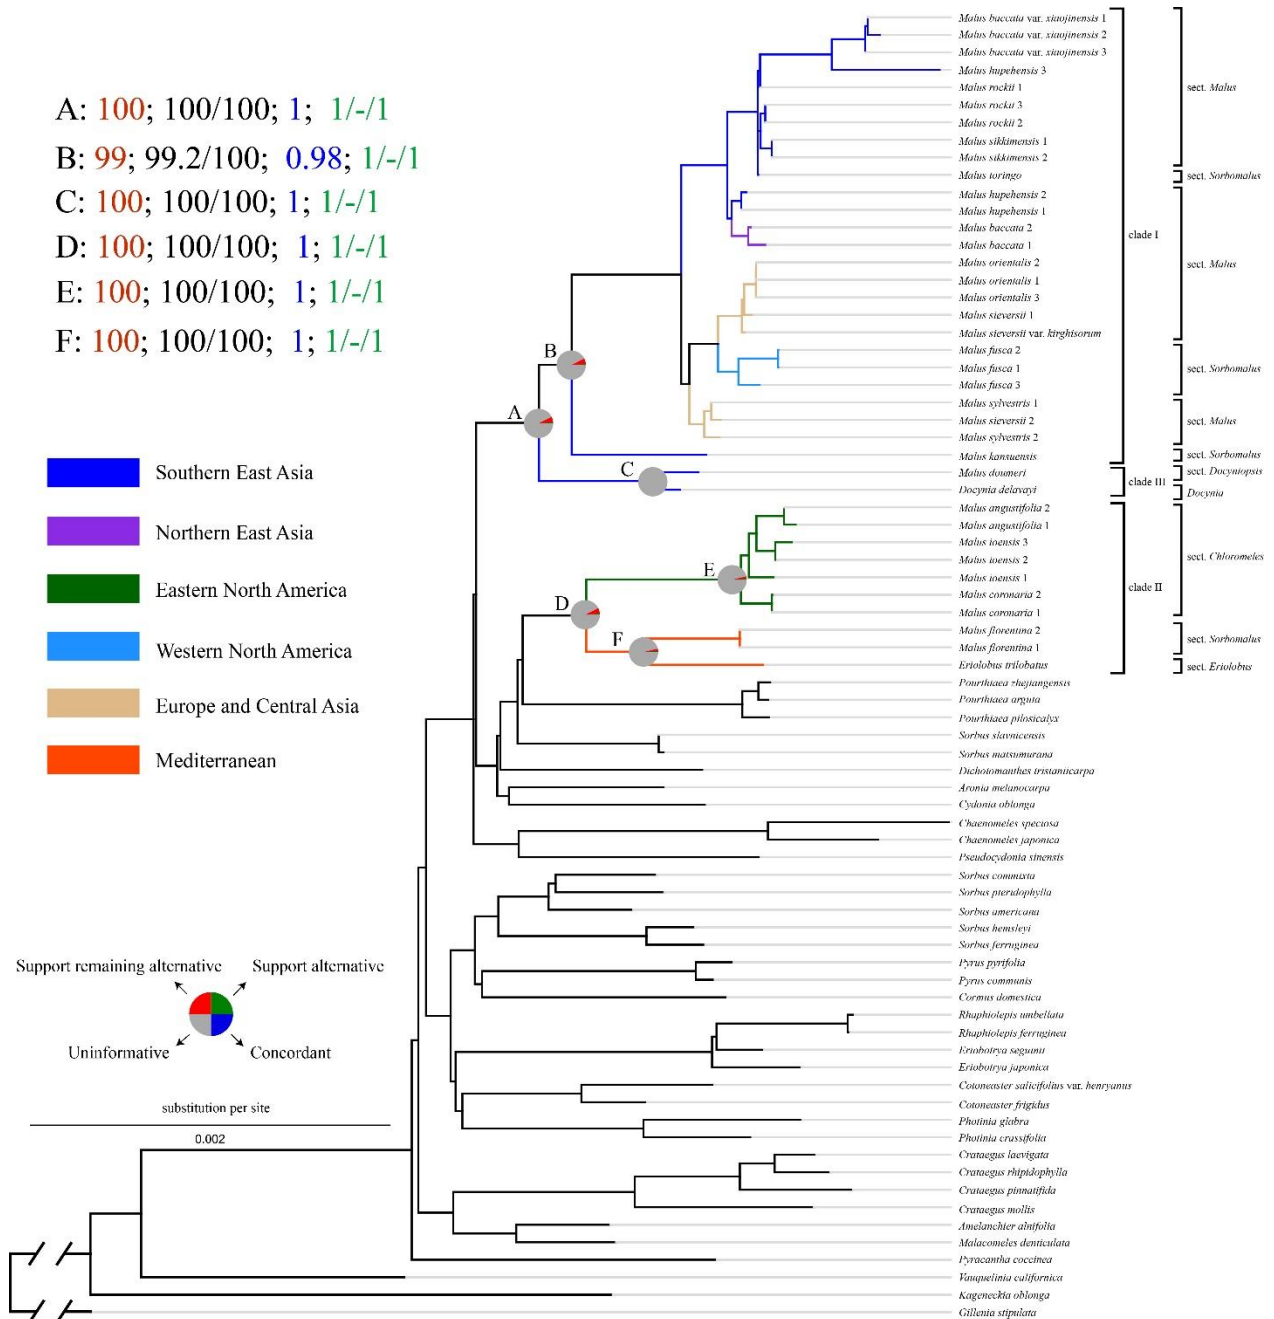

**Fig. 6.** Maximum likelihood phylogeny of *Malus* s.l. in the framework of Maleae inferred from RAxML analysis of 80 plastid coding regions. Pie charts on the focused five nodes (A, B, C, D, E, and F) present the proportion of gene trees that support that clade (blue), the proportion that support the main alternative bifurcation (green), the proportion that support the remaining alternatives (red), and the proportion (conflict or support) that have < 50%

bootstrap support (gray). All the other pie charts refer to Fig. S16, available from Dryad. The numbers (top left) indicate values associated with those nodes; they are bootstrap support values estimated from RAxML analysis (e.g., A: 100 labeled by red; see Fig. S12 available on Dryad for all nodes BS), the SH-aLRT support and Ultrafast Bootstrap (UFBoot) support estimated from IQ-TREE2 (e.g., A: 100/100 labeled by black; see Fig. S13 available on Dryad for all nodes support), the local posterior probability (LPP) estimated from ASTRAL-III (e.g., A: 1 labeled by blue; see Fig. S14 available on Dryad for all LPP), and Quartet Concordance/Quartet Differential/Quartet Informativeness estimated from Quartet Sampling analysis (e.g., 1/-/1 labeled by green; see Fig. S15 available on Dryad for all scores). Branches are colored by their distribution, i.e., dark blue, Southern East Asia; purple, Northern East Asia; green, Eastern North America; light blue, Western North America; yellowish-brown, Europe and Central Asia; red, the Mediterranean.

1090

1091

1092

1093

1094

1095

1096

1097

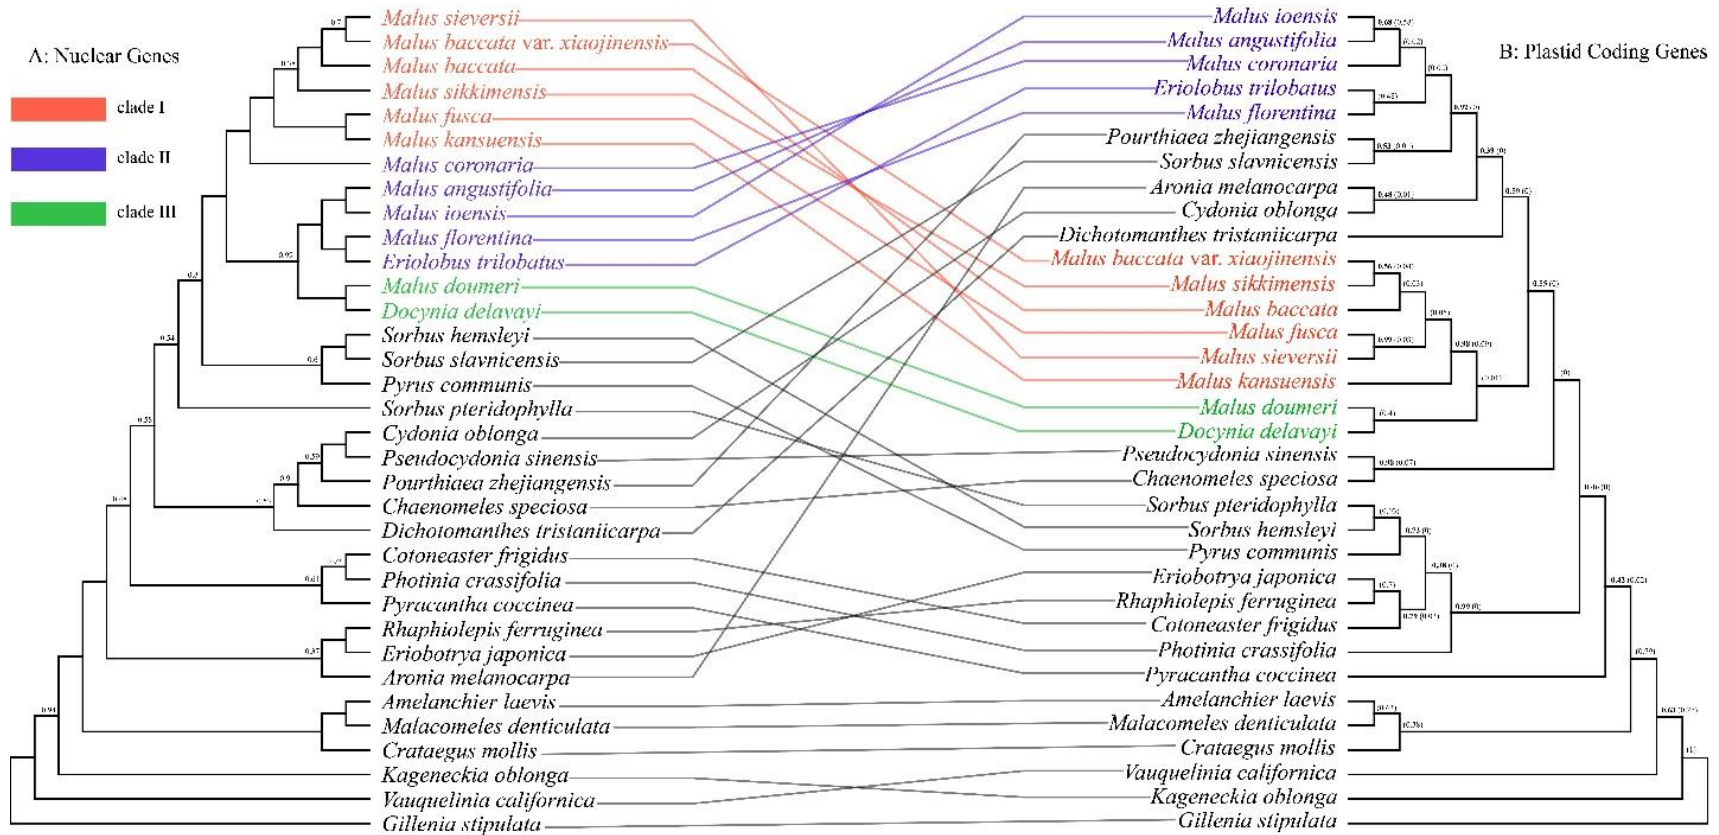

**Fig. 7.** Tanglegram illustrating the cytonuclear discordance. Left: ASTRAL species tree based on SCN genes; right: plastid tree estimated from 80 coding genes. All nodes have maximum support (LPP = 1) unless rooted. Numbers in the brackets in the plastid tree show the contribution of ILS to the conflicts between nuclear and plastid gene trees based on the multispecies coalescent model.

1098



1099

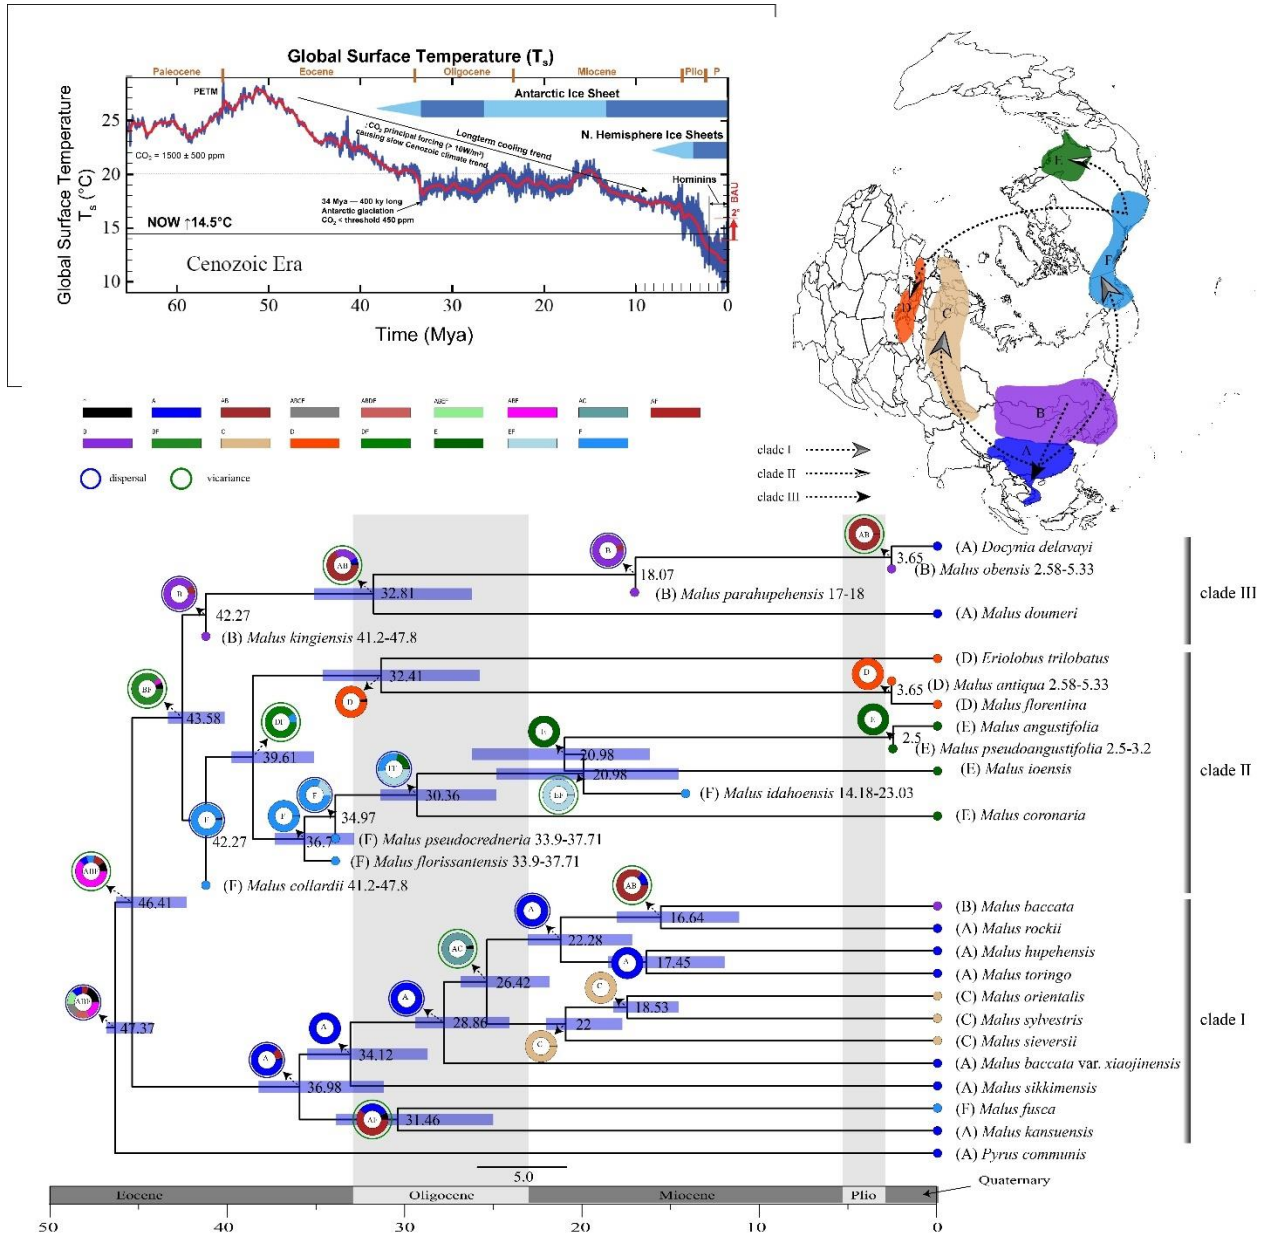

**Fig. 8.** Dated chronogram for the apple genus *Malus* inferred from BEAST with the Fossilized Birth-Death process based on the 19-taxa nuclear dataset. Also shown is the ancestral area reconstruction using BioGeoBEARS implemented in RASP, with the colored key identifying extant and possible ancestral ranges (upper-right map), (A), Southern East Asia; (B), Northern East Asia; (C), Europe and Central Asia; (D), Mediterranean; (E), Eastern North America; (F), Western North America. The upper-left chart displays a global surface temperature, indicating the major global climate trends in the Cenozoic Era (adapted from <https://www.alpineanalytics.com/Climate/DeepTime/WebDownloadImages/CenozoicTsGlobal-7.5w.600ppi.png>).



1 Supplementary files

2 Phylogenomic analyses in the apple genus *Malus* s.l. reveal widespread  
3 hybridization and allopolyploidy driving the diversifications, with insights into the  
4 complex biogeographic history in the Northern Hemisphere

5 Running title: Phylogenomics and biogeography of the apple genus (*Malus*)

6 Bin-Bin Liu<sup>1,2\*</sup>, Chen Ren<sup>3,4</sup>, Myounghai Kwak<sup>5</sup>, Richard G.J. Hodel<sup>2</sup>, Chao Xu<sup>1</sup>, Jian He<sup>6</sup>, Wen-Bin  
7 Zhou<sup>7</sup>, Chien-Hsun Huang<sup>8</sup>, Hong Ma<sup>9</sup>, Guan-Ze Qian<sup>10</sup>, De-Yuan Hong<sup>1</sup>, Jun Wen<sup>2\*</sup>

8 <sup>1</sup>State Key Laboratory of Systematic and Evolutionary Botany, Institute of Botany, Chinese Academy of  
9 Sciences, Beijing 100093, China

10 <sup>2</sup>Department of Botany, National Museum of Natural History, Smithsonian Institution, PO Box 37012,  
11 Washington, DC 20013-7012, USA

12 <sup>3</sup>Key Laboratory of Plant Resources Conservation and Sustainable Utilization, South China Botanical  
13 Garden, Chinese Academy of Sciences, Guangzhou 510650, Guangdong, China.

14 <sup>4</sup>Guangdong Provincial Key Laboratory of Applied Botany, South China Botanical Garden, Chinese  
15 Academy of Sciences, Guangzhou 510650, Guangdong, China.

16 <sup>5</sup>National Institute of Biological Resources, Incheon 22689, South Korea.

17 <sup>6</sup>School of Ecology and Nature Conservation, Beijing Forestry University, Beijing, 100083 PR China.

18 <sup>7</sup>Department of Plant and Microbial Biology, North Carolina State University, Raleigh, NC 27965, USA.

19 <sup>8</sup>State Key Laboratory of Genetic Engineering and Collaborative Innovation Center of Genetics and

20 Development, Ministry of Education Key Laboratory of Biodiversity and Ecological Engineering,  
21 Institute of Plant Biology, Center of Evolutionary Biology, School of Life Sciences, Fudan University,  
22 Shanghai 200433, China.

23 <sup>9</sup>Department of Biology, Huck Institutes of the Life Sciences, Pennsylvania State University, 510D  
24 Mueller Laboratory, University Park, PA 16802 USA.

25 <sup>10</sup>College of Life Sciences, Liaocheng University, Liaocheng 252059, China

26 Correspondance: Bin-Bin Liu ([liubinbin@ibcas.ac.cn](mailto:liubinbin@ibcas.ac.cn)) or Jun Wen ([wenj@si.edu](mailto:wenj@si.edu))

27

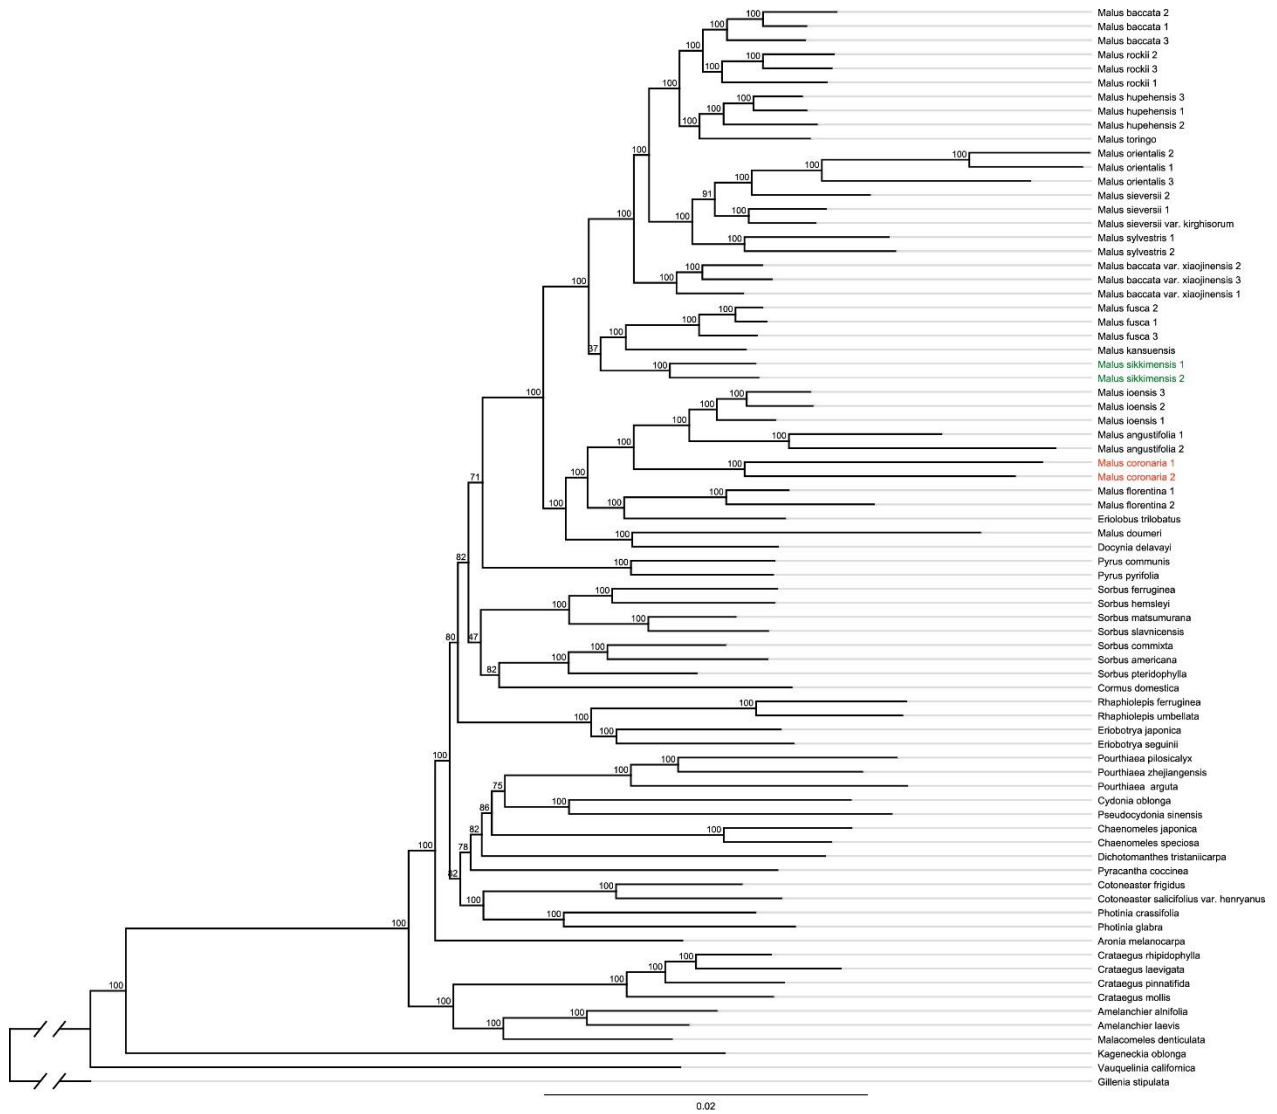

**Fig. S1.** Maximum likelihood phylogeny of *Malus* s.l. in the framework of Maleae inferred from RAxML analysis of the concatenated 50%-sample dataset. Numbers above the branches indicate the bootstrap support.

28

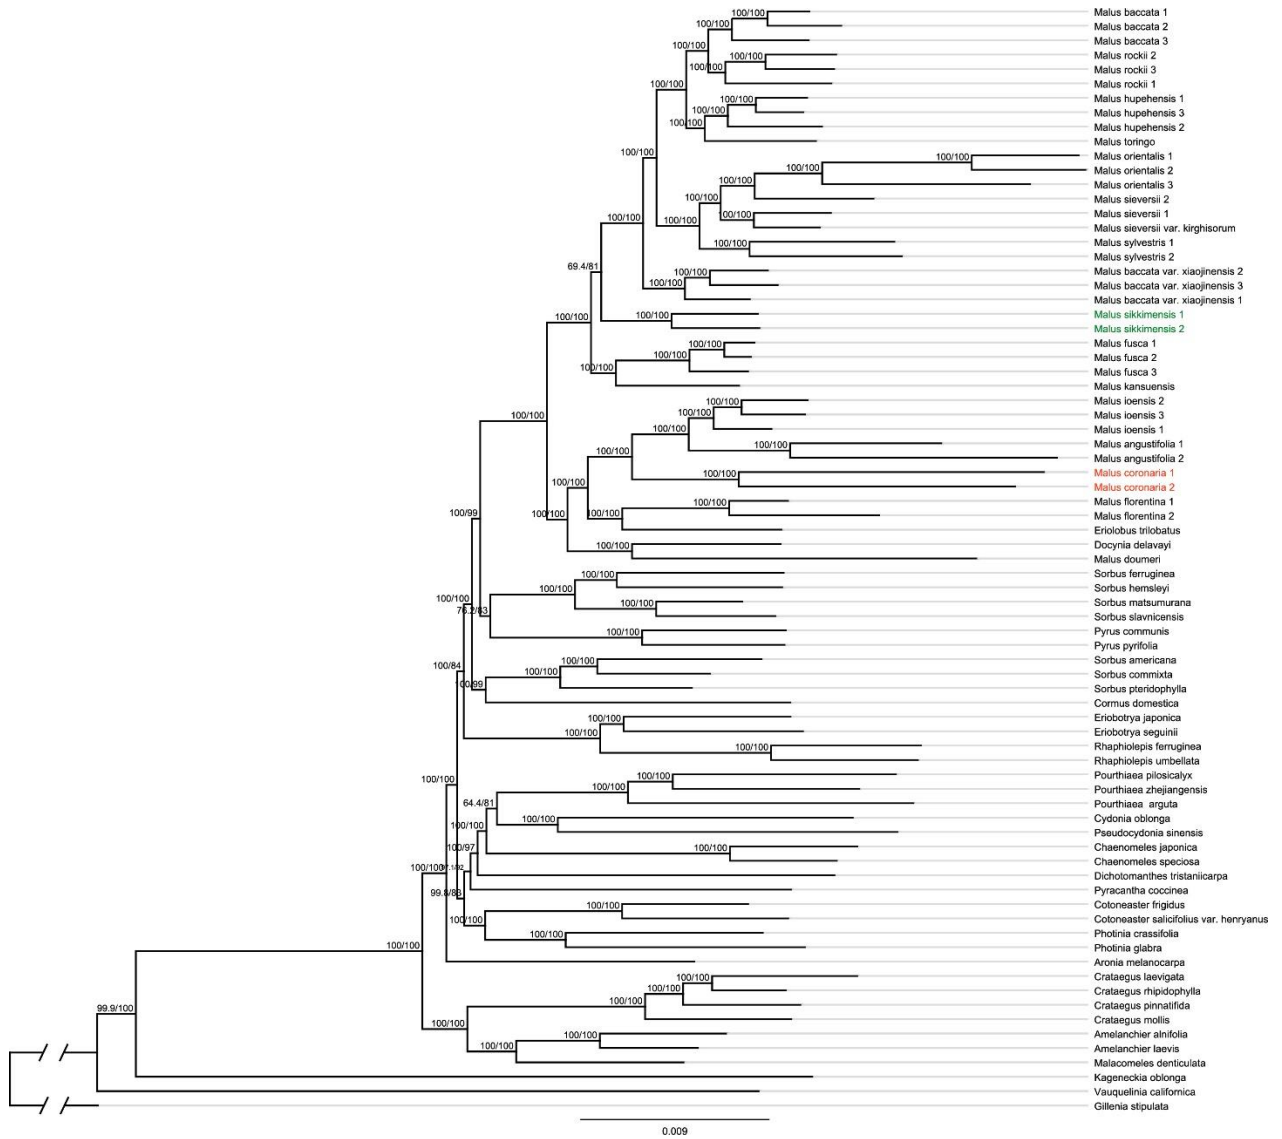

**Fig. S2.** Maximum likelihood phylogeny of *Malus* s.l. in the framework of Maleae inferred from IQ-TREE2 analysis of the concatenated 50%-sample dataset. Numbers above the branches indicate the SH-aLRT support and Ultrafast Bootstrap support.

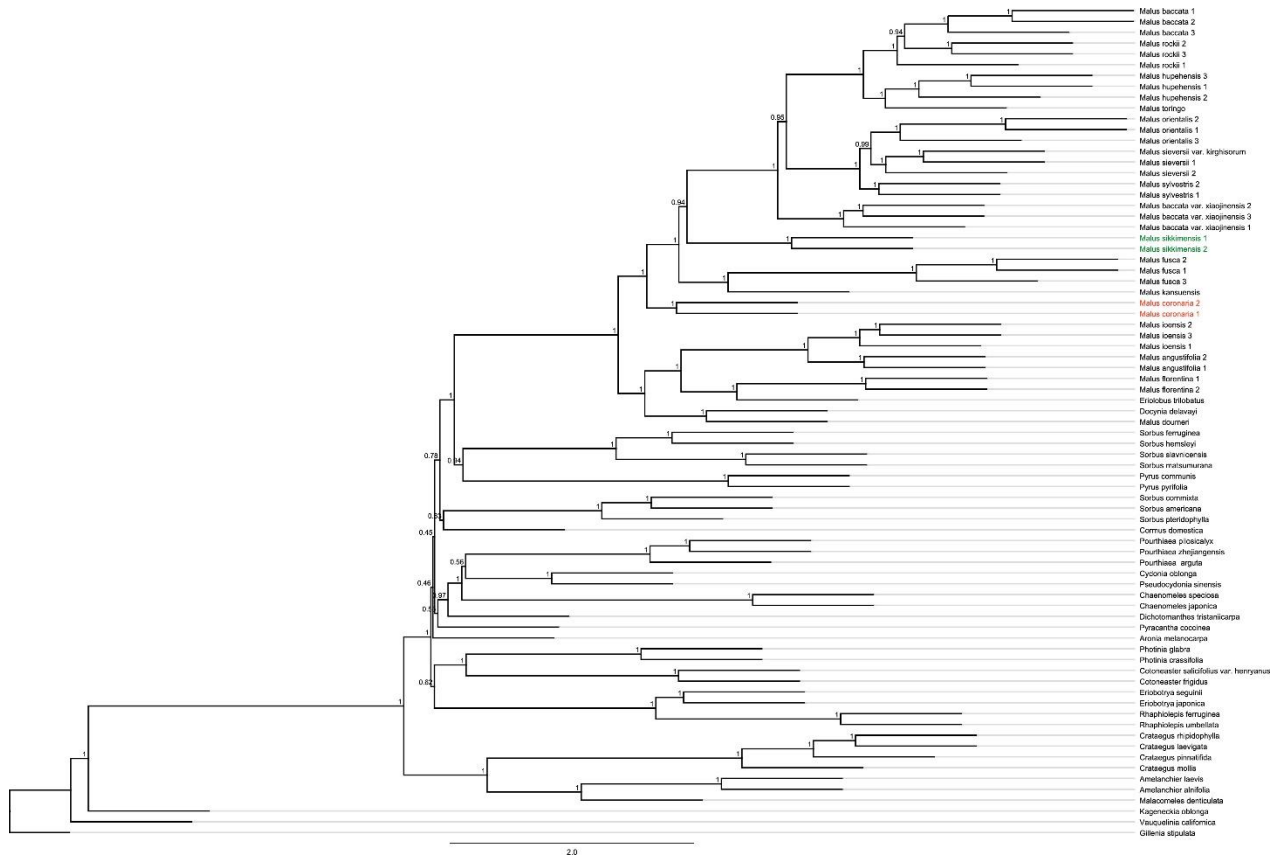

**Fig. S3.** Species tree of *Malus* s.l. in the framework of Maleae inferred from ASTRAL-III of the concatenated 50%-sample dataset. Numbers above the branches indicate the branch support values measuring the support for a local posterior possibility.

30

31

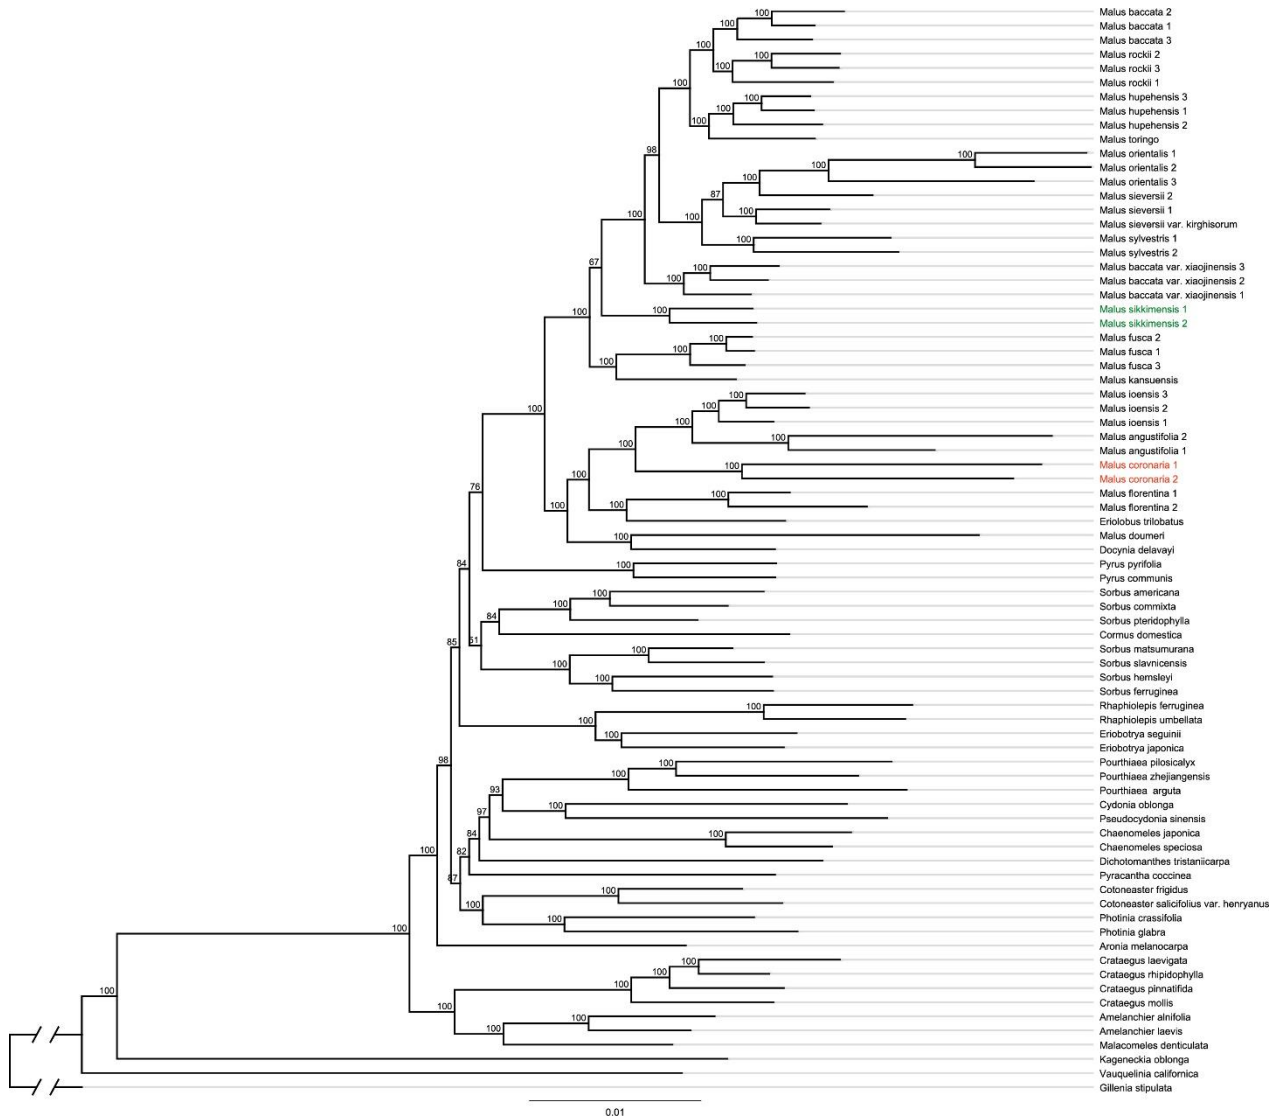

**Fig. S4.** Maximum likelihood phylogeny of *Malus* s.l. in the framework of Maleae inferred from RAxML analysis of the concatenated 80%-sample dataset. Numbers above the branches indicate the bootstrap support (BS).

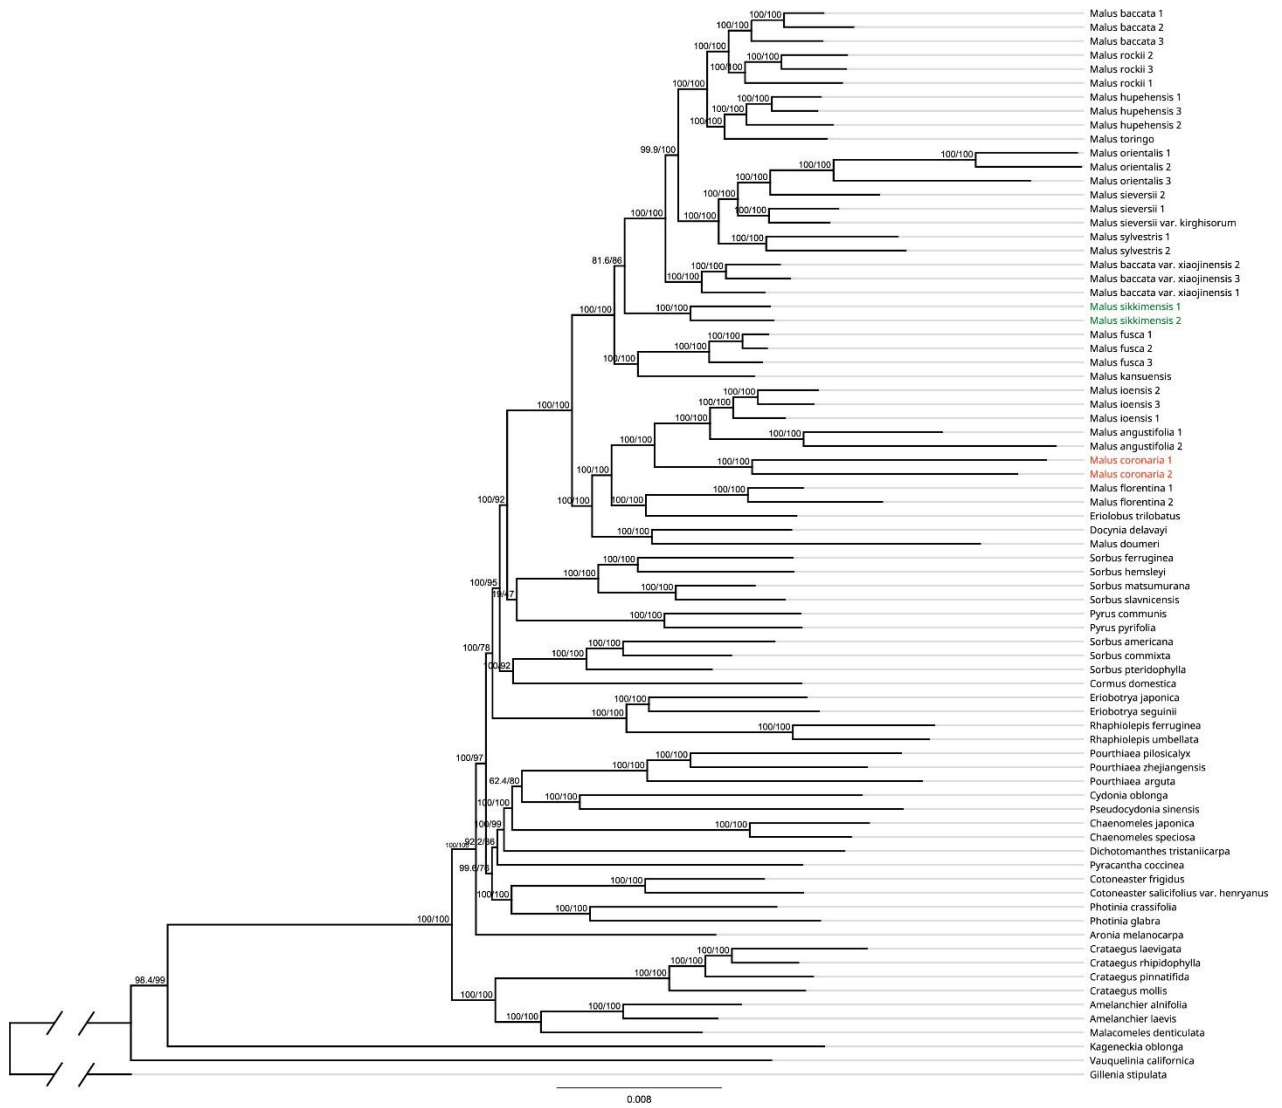

**Fig. S5.** Maximum likelihood phylogeny of *Malus* s.l. in the framework of Maleae inferred from IQ-TREE2 analysis of the concatenated 80%-sample dataset. Numbers above the branches indicate the SH-aLRT support and Ultrafast Bootstrap (UFBoot) support.



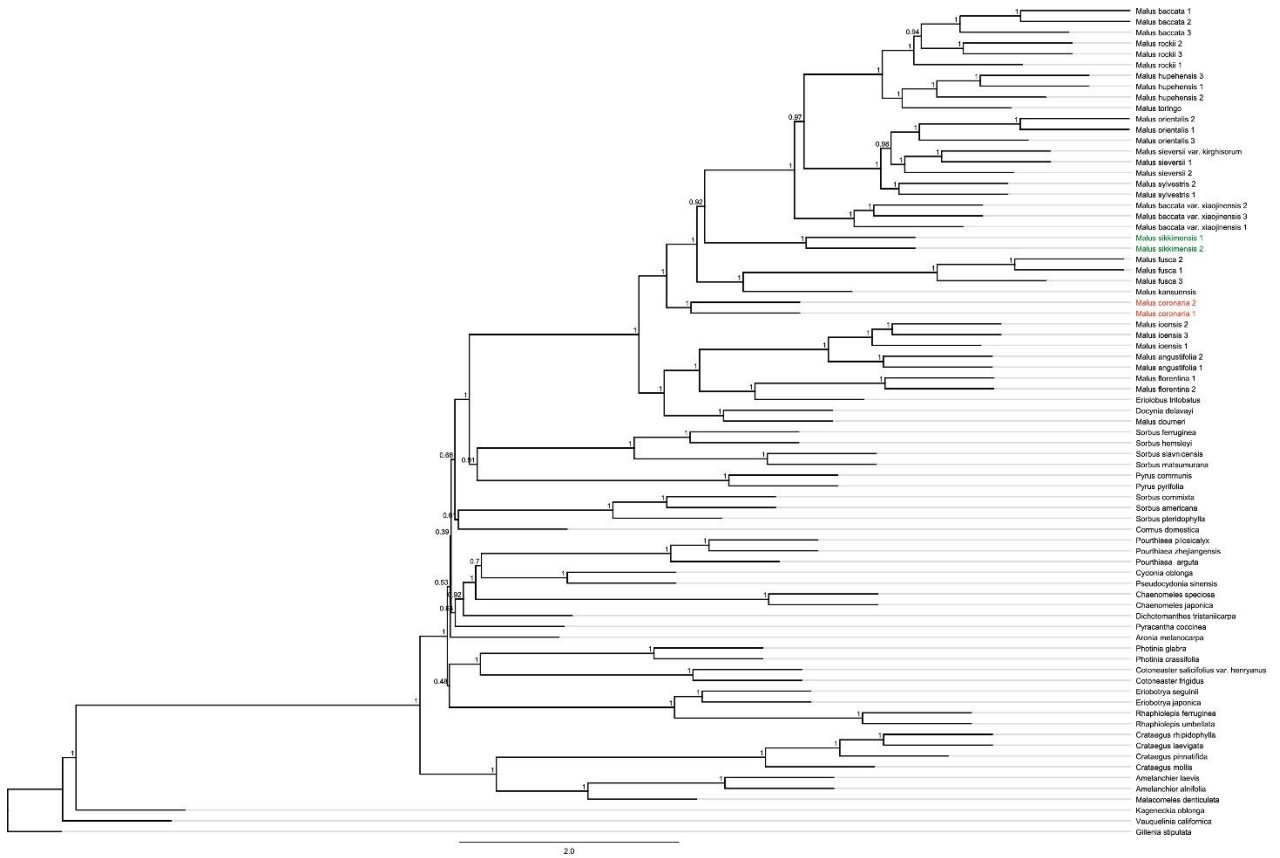

**Fig. S6.** Species tree of *Malus* s.l. in the framework of Maleae inferred from ASTRAL-III of the concatenated 50%-sample dataset. Numbers above the branches indicate the branch support values measuring the support for a local posterior possibility.

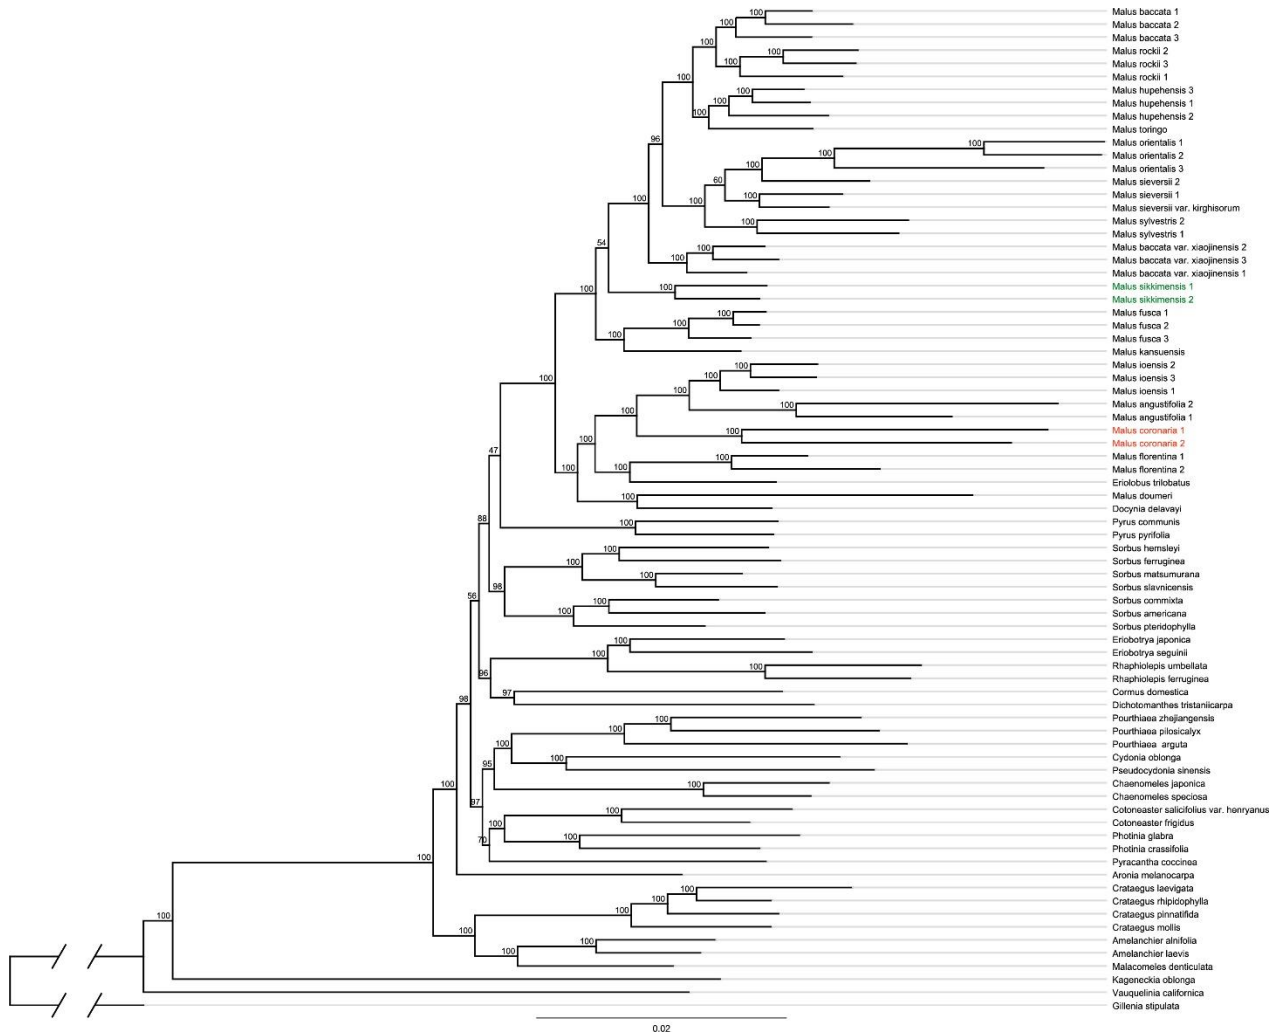

**Fig. S7.** Maximum likelihood phylogeny of *Malus* s.l. in the framework of Maleae inferred from RAxML analysis of the all-sample dataset. Numbers above the branches indicate the bootstrap support (BS).

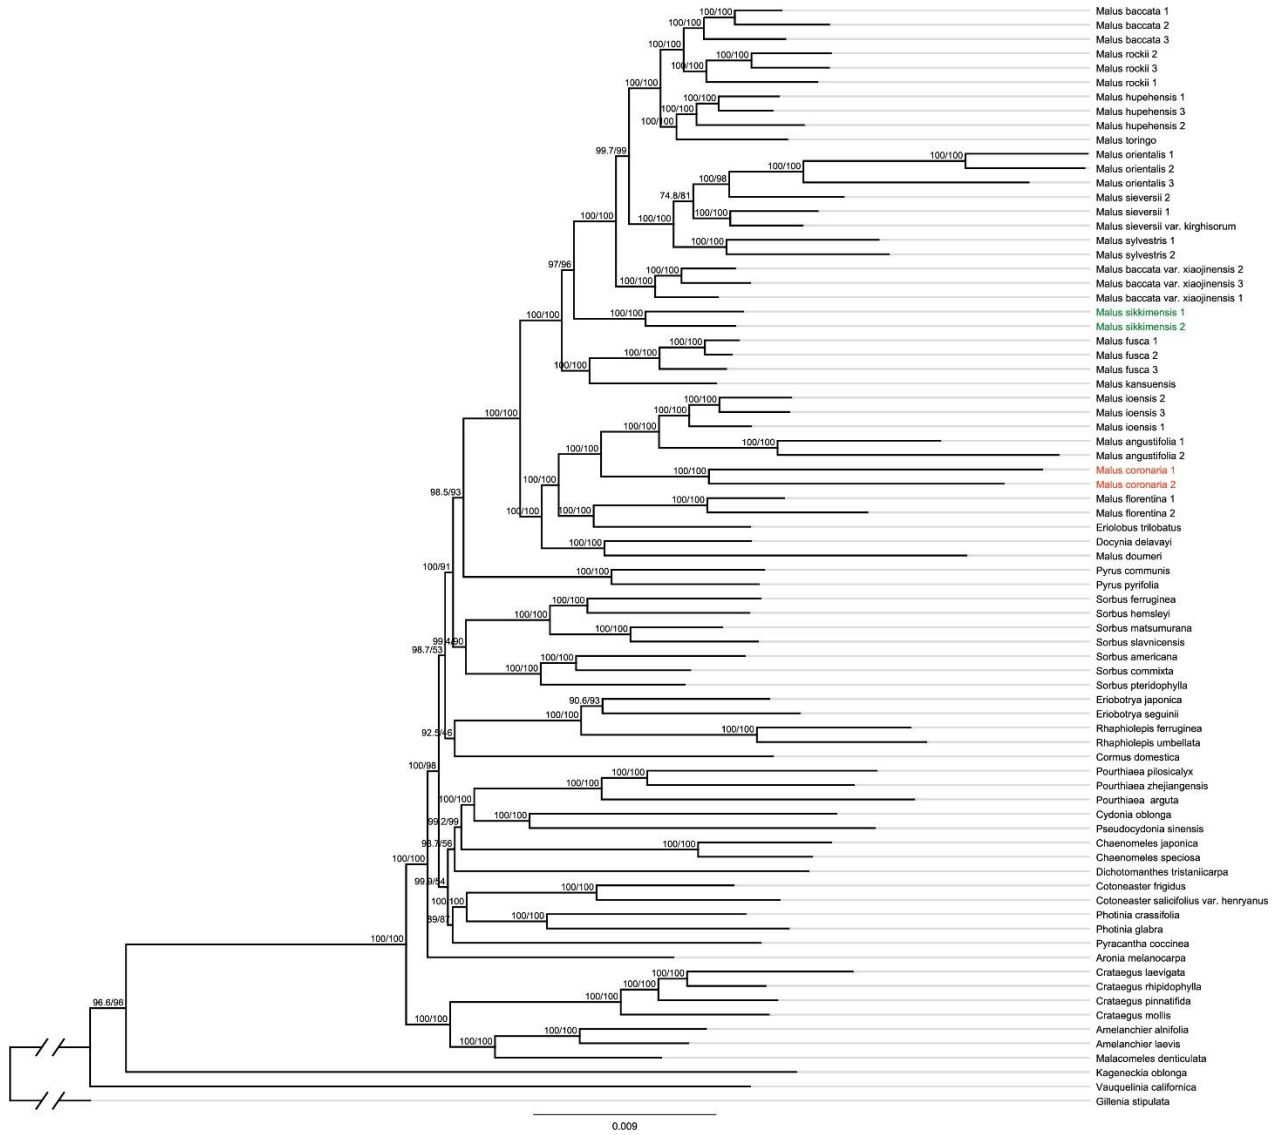

**Fig. S8.** Maximum likelihood phylogeny of *Malus* s.l. in the framework of Maleae inferred from IQ-TREE2 analysis of the all-sample dataset. Numbers above the branches indicate the SH-aLRT support and Ultrafast Bootstrap (UFBoot) support.

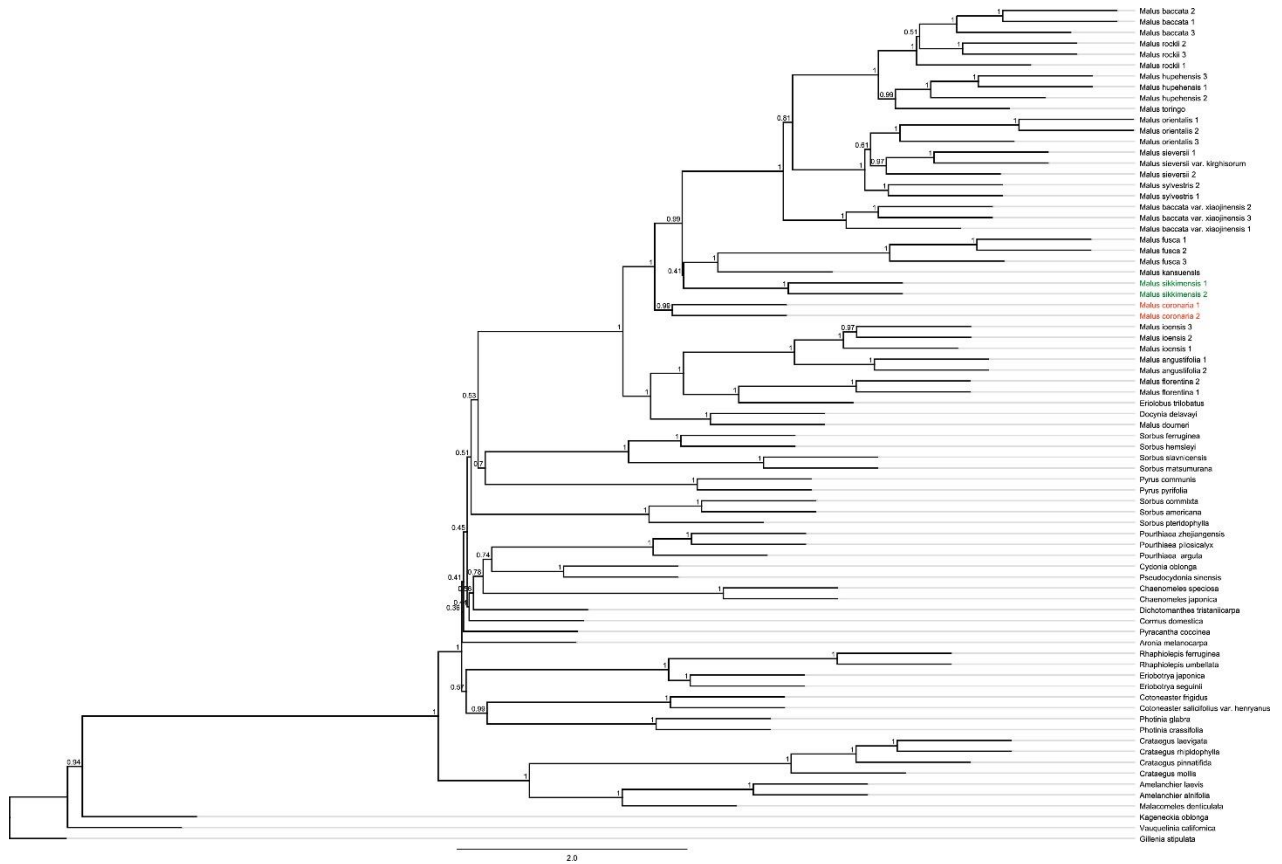

**Fig. S9.** Species tree of *Malus* s.l. in the framework of Maleae inferred from ASTRAL-III of the all-sample dataset. Numbers above the branches indicate the branch support values measuring the support for a local posterior possibility.

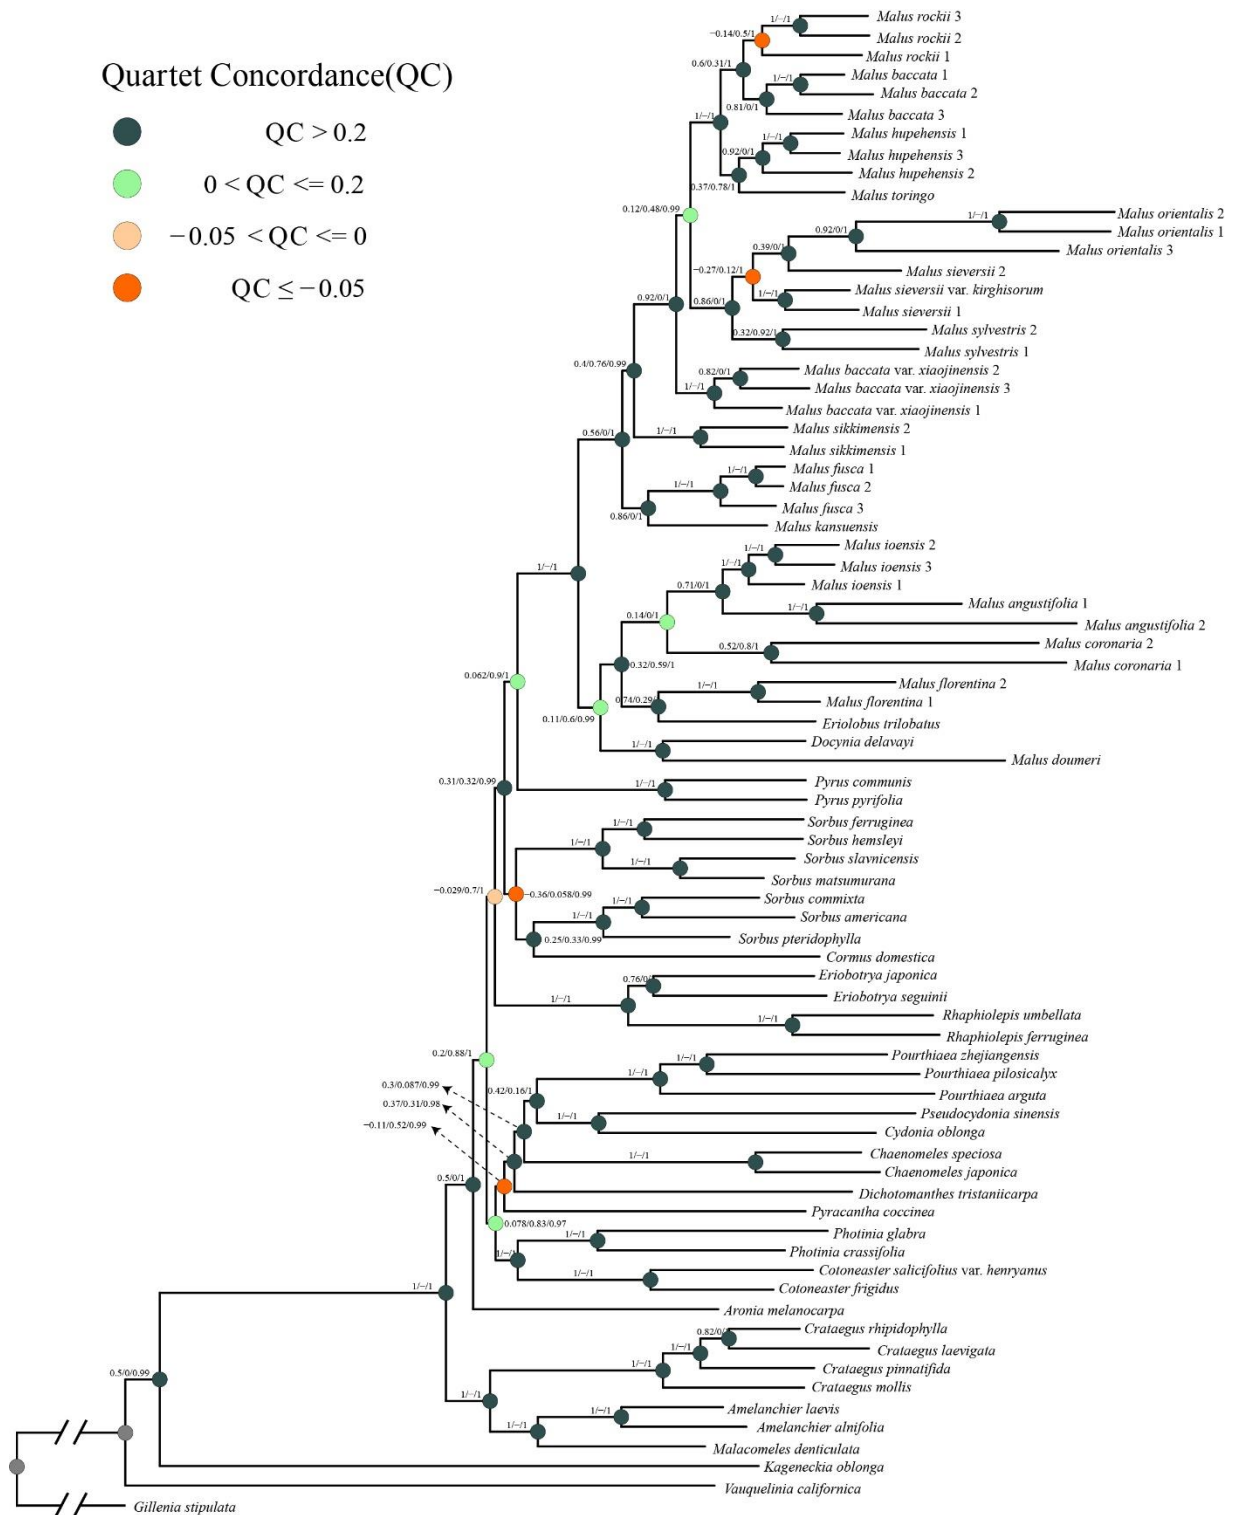

**Fig. S10.** Maximum likelihood phylogeny of *Malus* s.l. in the framework of Maleae inferred from RAxML analysis of the concatenated 80%-sample dataset. Quartet Sampling Scores are shown on branches indicating Quartet Concordance/Quartet Differential/Quartet Informativeness. Quartet Concordance is color-coded according to the legend.

38

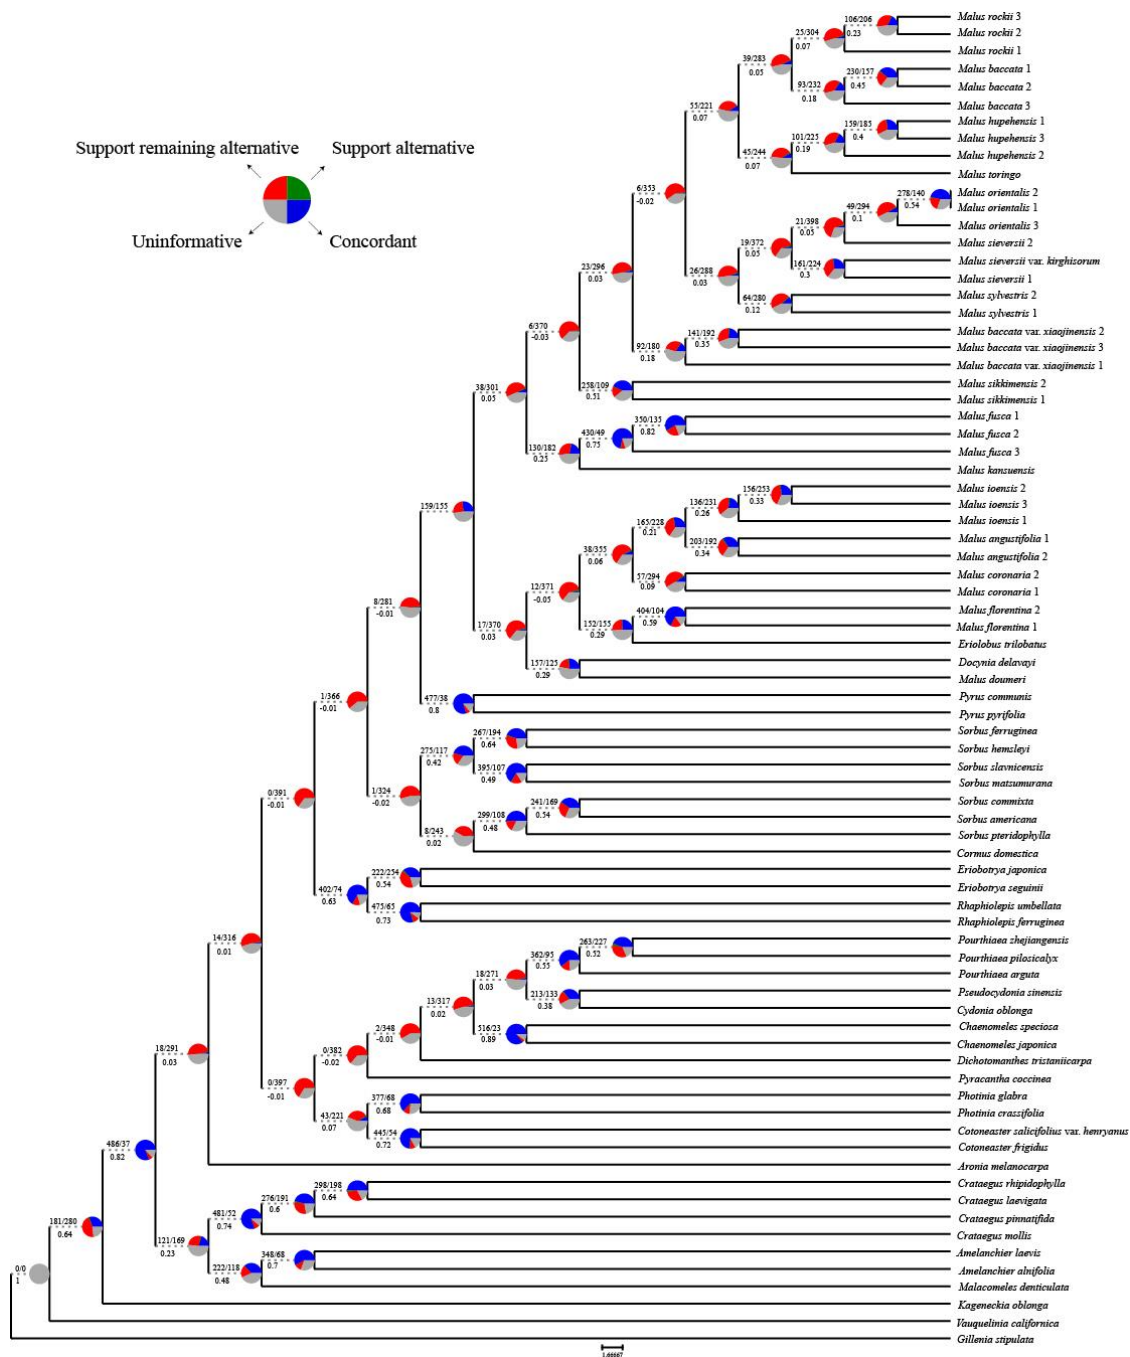

**Fig. S11.** Maximum likelihood cladogram of *Malus* s.l. inferred from RAXML analysis of the concatenated 80%-sample dataset. Numbers above branches indicate the number of gene trees concordant/conflicting with that node in the species tree. Numbers below the branches are the Internode Certainty All (ICA) score. Pie charts on nodes present the proportion of gene trees that support that clade (blue), the proportion that support the main alternative bifurcation (green), the proportion that support the remaining alternatives (red), and the proportion (conflict or support) that have < 50% bootstrap support (gray).

39

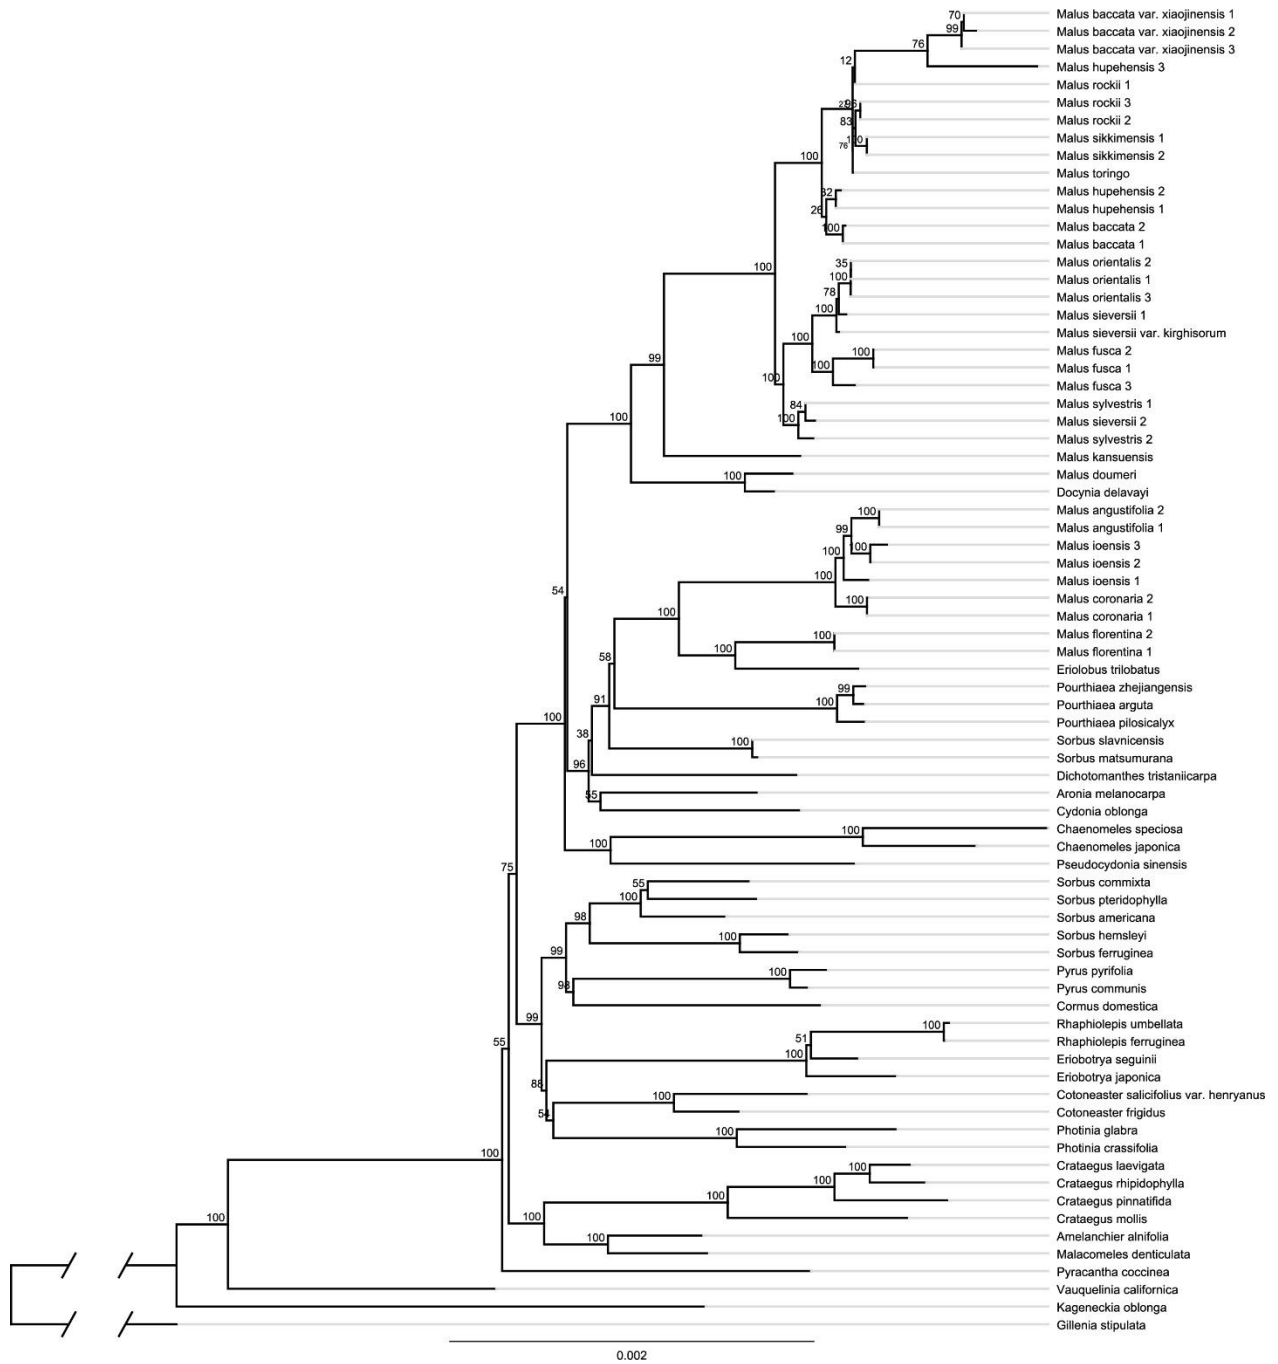

**Fig. S12.** Maximum likelihood phylogeny of *Malus* s.l. in the framework of Maleae inferred from RAxML analysis of the concatenated 80 plastid coding genes. Numbers above the branches indicate the bootstrap support.

40

41



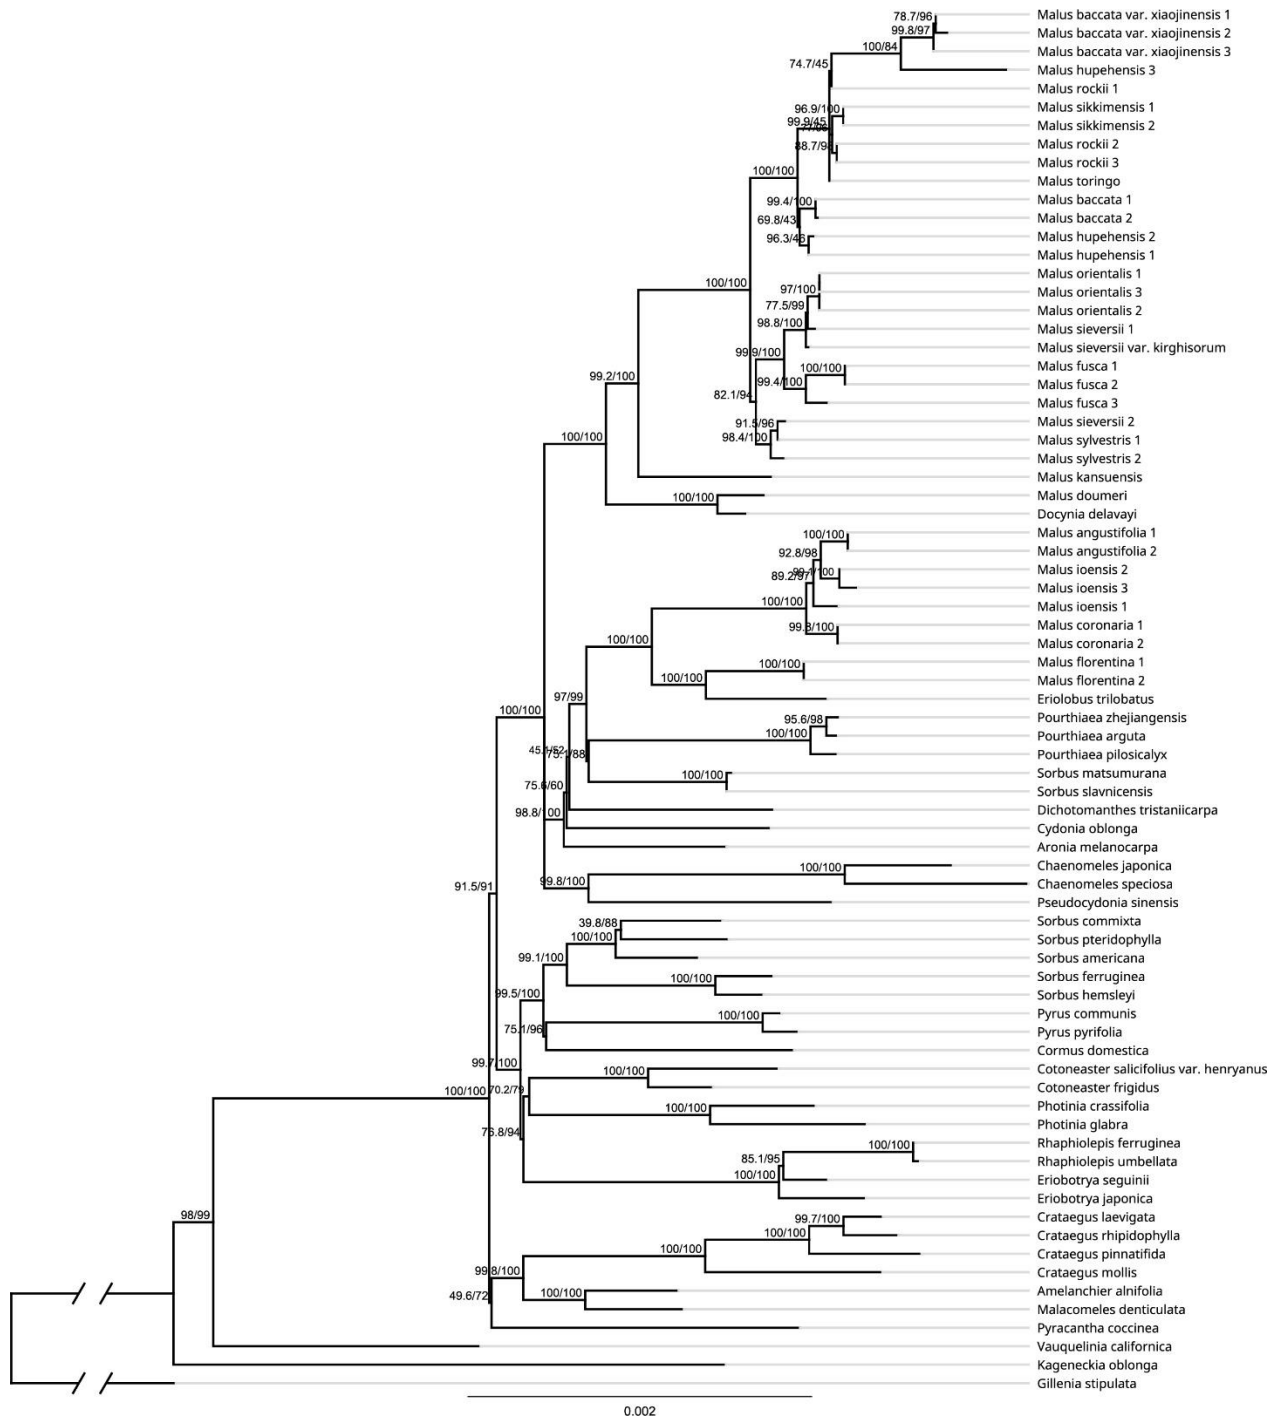

**Fig. S13.** Maximum likelihood phylogeny of *Malus* s.l. in the framework of Maleae inferred from IQ-TREE2 analysis of the concatenated 80 plastid coding genes. Numbers above the branches indicate the SH-aLRT support and Ultrafast Bootstrap support.

42

43

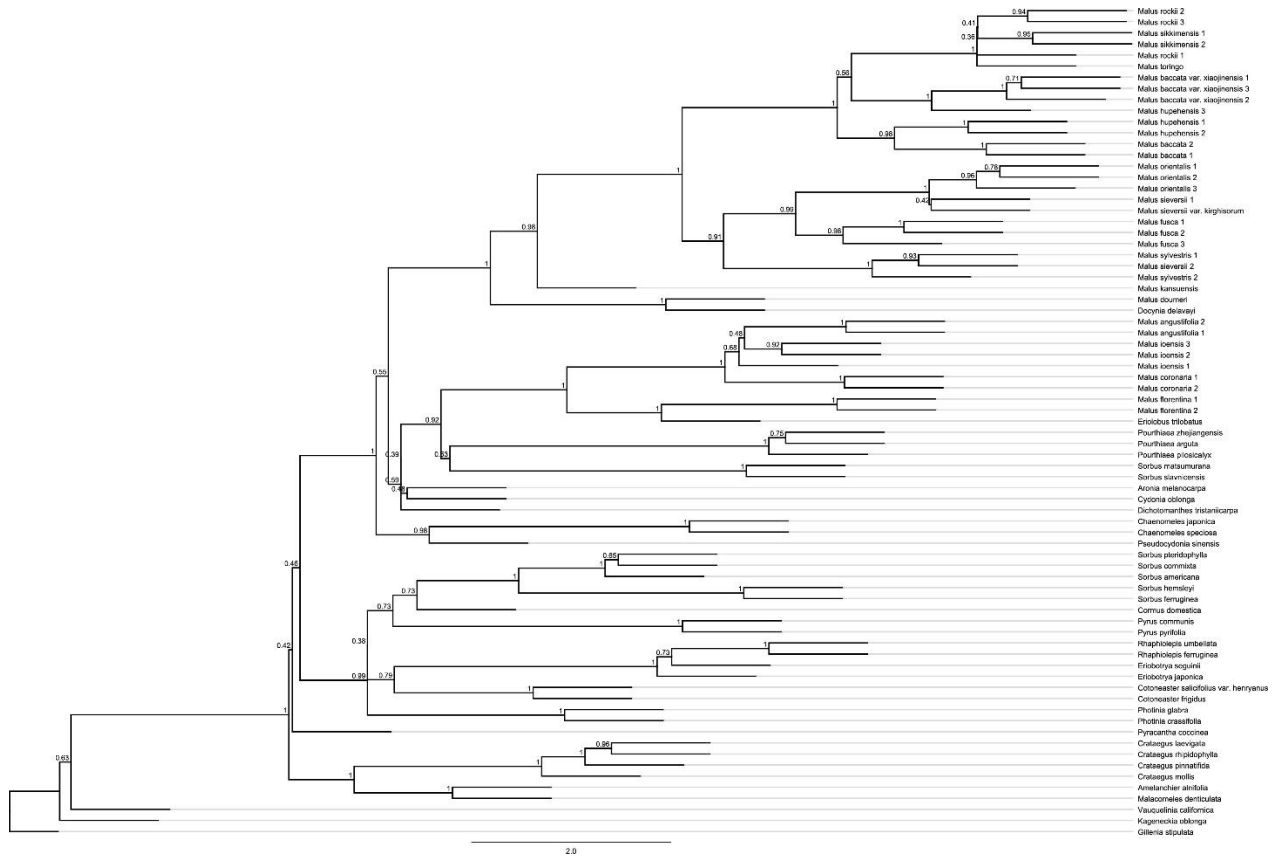

**Fig. S14.** Species tree of *Malus* s.l. in the framework of Maleae inferred from ASTRAL-III of the concatenated 80 plastid coding genes. Numbers above the branches indicate the branch support values measuring the support for a local posterior possibility.

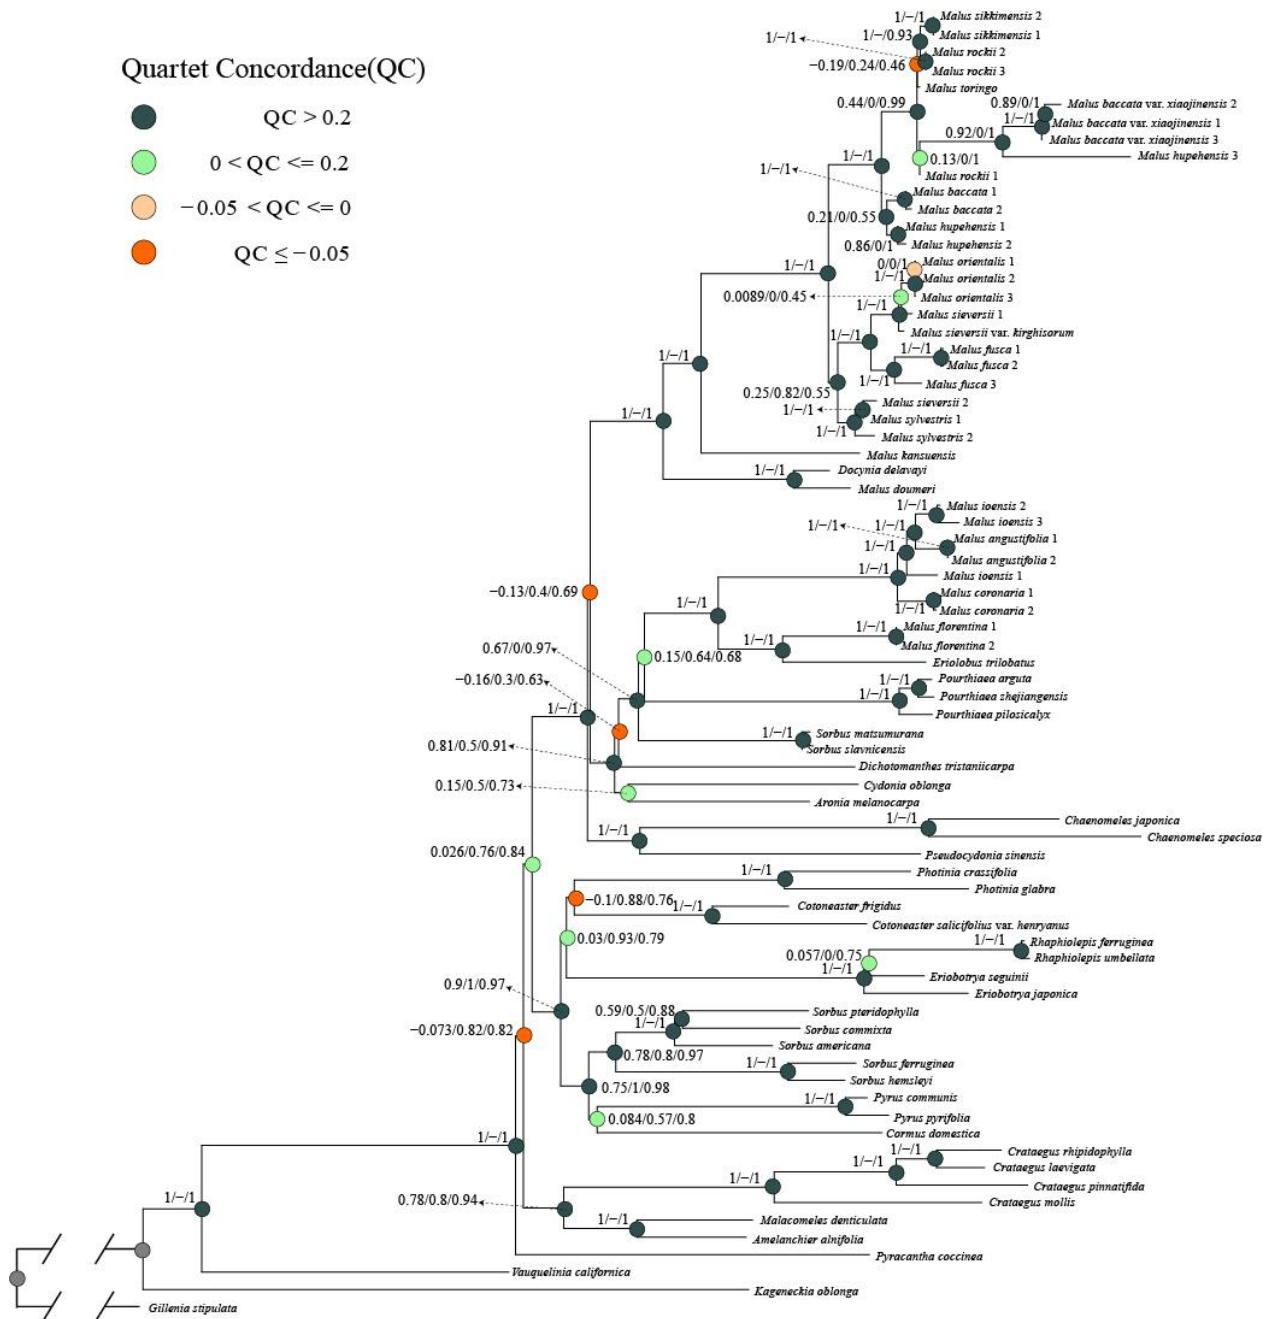

**Fig. S15.** Maximum likelihood phylogeny of *Malus* s.l. in the framework of Maleae inferred from RAxML analysis of the concatenated 80 plastid coding genes. Quartet Samping Scores are shown on branches indicating Quartet Concordance/Quartet Differential/Quartet Informativeness. Quartet Concordance is color-coded according to the legend.

45

46

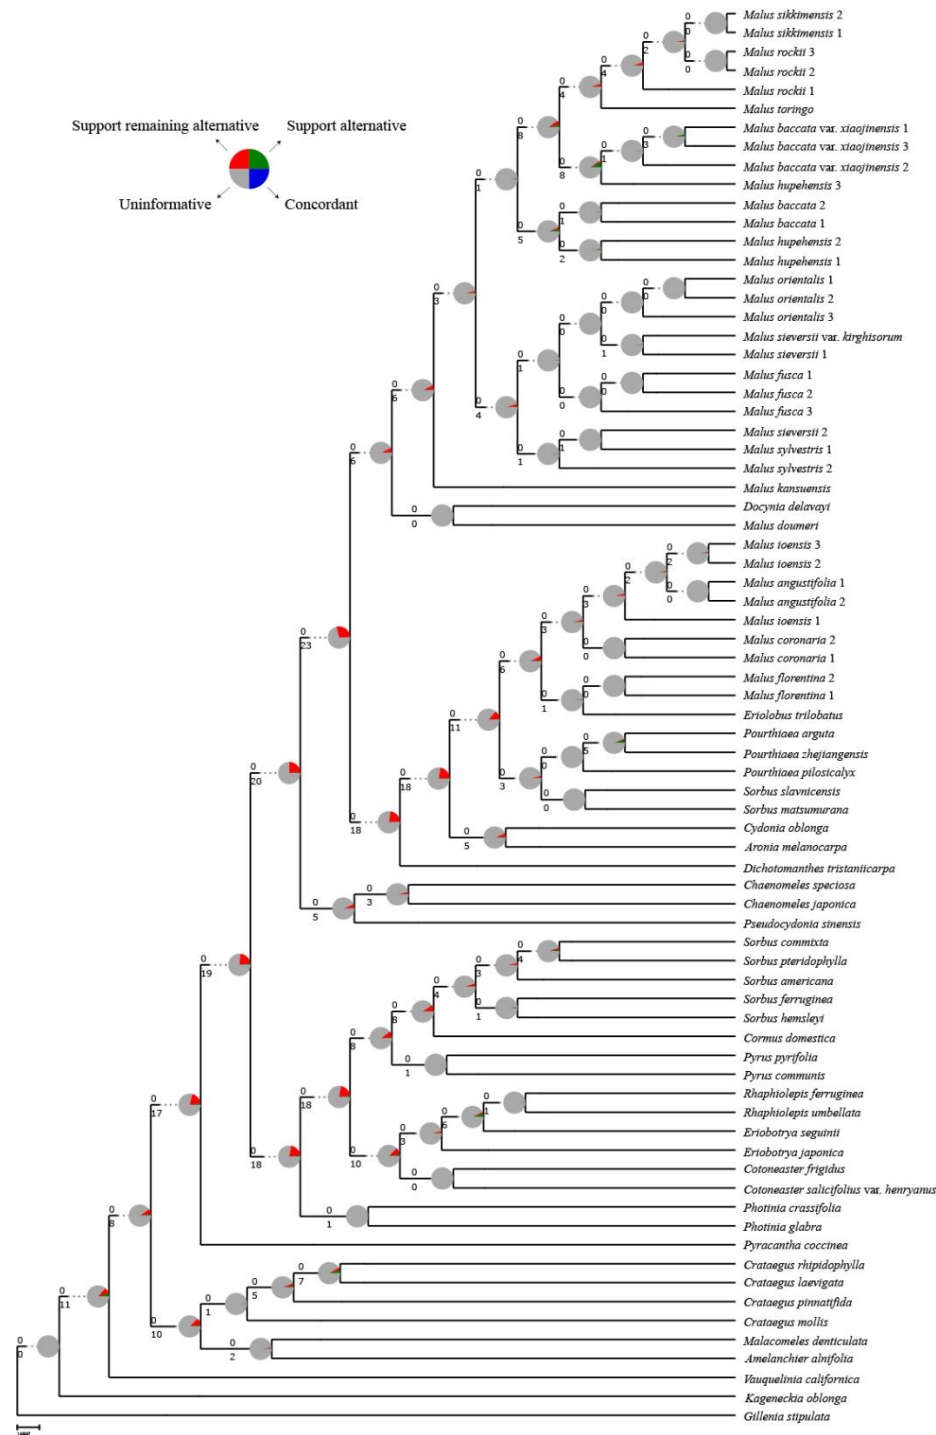

**Fig. S16.** Maximum likelihood cladogram of *Malus* s.l. inferred from RAxML analysis of the concatenated 80 plastid coding genes. Numbers above branches indicate the number of gene trees concordant/conflicting with that node in the species tree. Numbers below the branches are the Internode Certainty All (ICA) score. Pie charts on nodes present the proportion of gene trees that support that clade (blue), the proportion that support the main alternative bifurcation (green), the proportion that support the remaining alternatives (red), and the proportion (conflict or support) that have < 50% bootstrap support (gray).

47

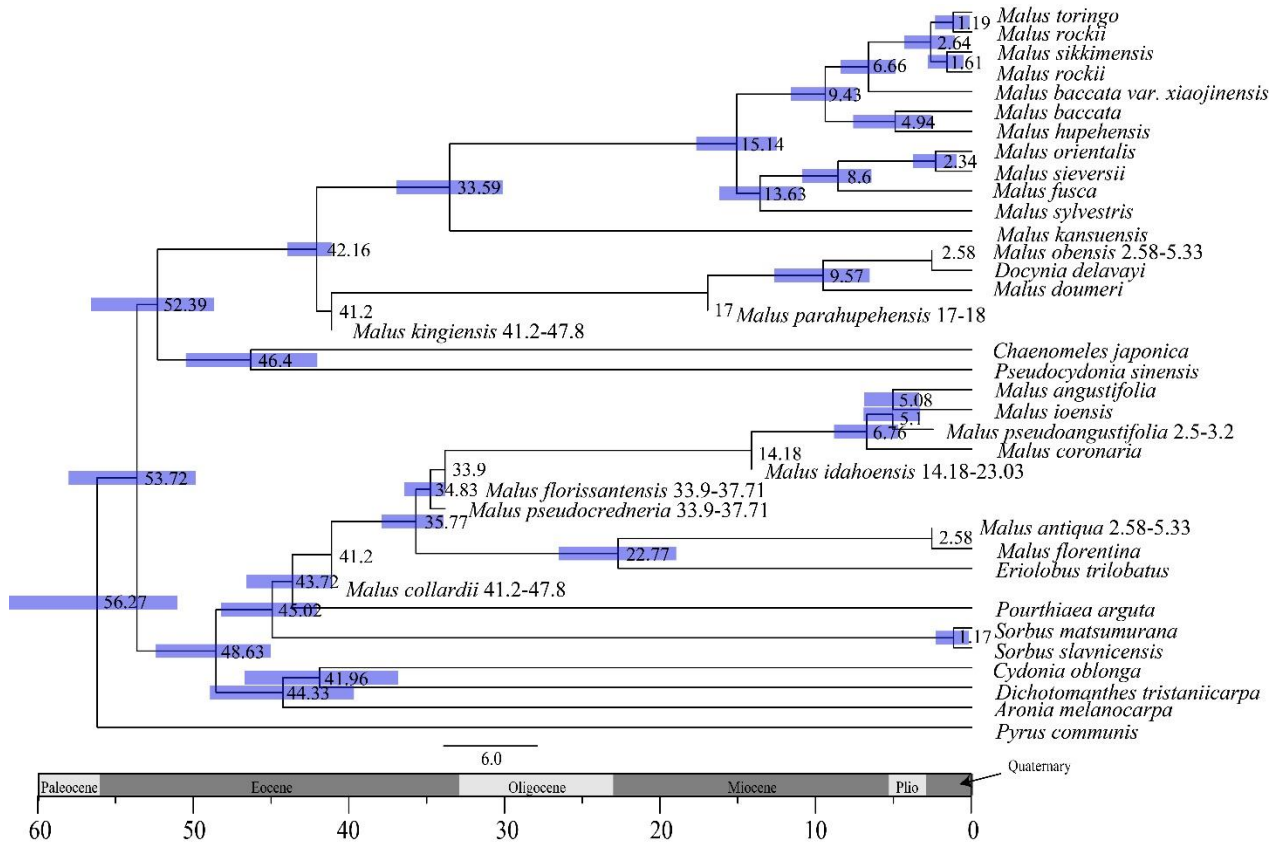

**Fig. S17.** Dated chronogram for the apple genus *Malus* inferred from BEAST with the Fossilized Birth-Death process based on the 80 plastid coding genes dataset.

48

49

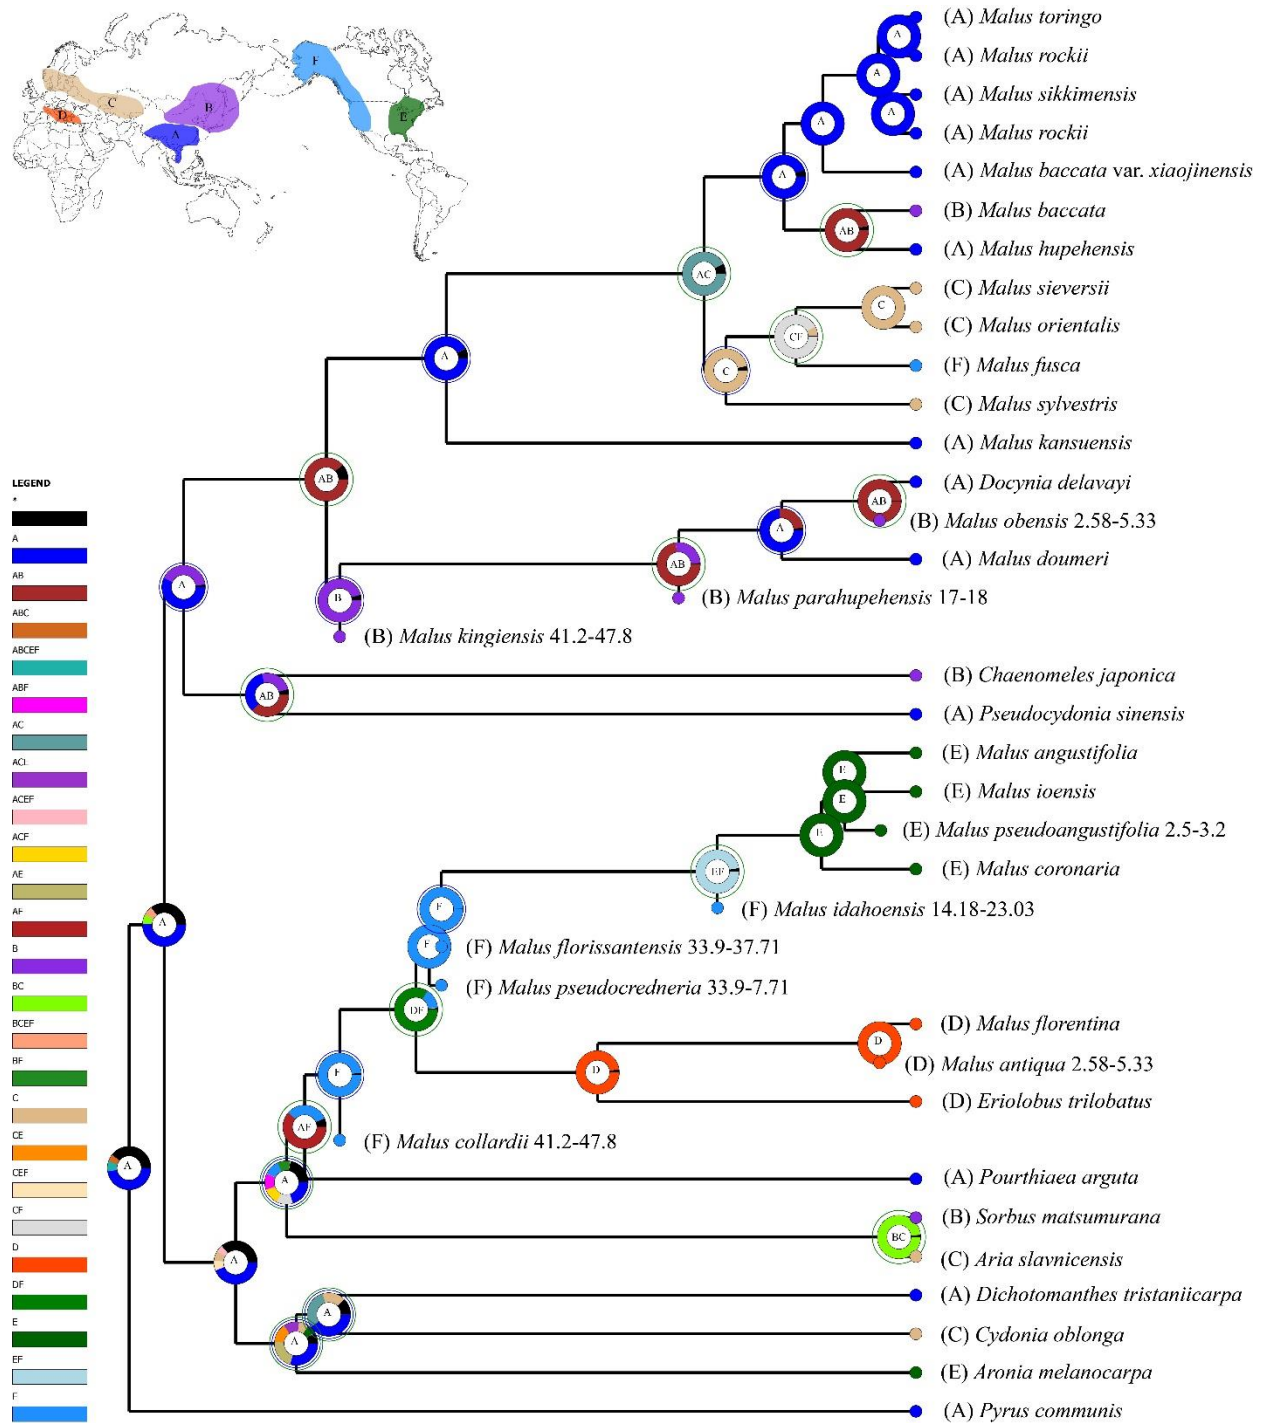

**Fig. S18.** The ancestral area reconstruction using BioGeoBEARS from the 80 plastid coding genes dataset, with the colored key identifying extant and possible ancestral ranges, (A), Southern East Asia; (B), Northern East Asia; (C), Europe and Central Asia; (D), Mediterranean; (E), Eastern North America; (F), Western North America.
